# Supplementary material
Source: PubMed Central journal article supplement (PMC3447998)
Supplement: NIHMS395351-supplement-1_si_001.pdf [file NIHMS395351-supplement-1_si_001.pdf]

Table S1

| Sequence   | % 1Me | % 2Me | % 3Me | Sequence   | % 1Me | % 2Me | % 3Me |
|------------|-------|-------|-------|------------|-------|-------|-------|
| AKKVAFAFAK | ---   | ---   | ---   | MKRRAFAFAK | ---   | ---   | ---   |
| AKRFAFAFAK | ---   | ---   | ---   | MNKRAFAFAK | ---   | ---   | •     |
| AKRVAFAFAK | ---   | ---   | ---   | MNRFAFAFAK | ---   | ---   | •     |
| ARRFAFAFAK | ---   | ---   | ---   | MPKRAFAFAK | •••   | ••••  | •     |
| APKAFAFAK  | •••   | ••    | ---   | MPRRAFAFAK | ••    | ---   | ---   |
| APKFFAFAK  | •••   | ••    | ---   | PPKTAFAFAK | ---   | ••••• | NA    |
| APKKAFAFAK | •••   | •••   | ••    | PPKRAFAFAK | ---   | ••••• | NA    |
| APKRAFAFAK | •••   | •••   | •••   | SAKRAFAFSK | •     | •••   | •••   |
| APKRSAILPK | ••••  | •••   | ---   | SEKRAFAFSK | •     | ---   | ••    |
| APKVAFAFAK | ••    | •     | ---   | SFKRAFAFSK | ---   | ---   | ---   |
| APKWAFAFAK | •••   | •     | ---   | SHKRAFAFSK | ---   | ---   | ---   |
| APRVAFAFAK | ••    | •     | •     | SKKRAFAFSK | ---   | ---   | ---   |
| GGKKAFAFAK | ••    | •     | •     | SKRFAFAFAK | ---   | ---   | ---   |
| GGKRAFAFAK | •     | •     | •     | SKRRAFAFAK | ---   | ---   | ---   |
| GKKFAFAFAK | ---   | ---   | ---   | SMKRAFAFSK | •     | ---   | ---   |
| GKKRAFAFAK | ---   | ---   | ---   | SNKRAFAFSK | •••   | ••    | •     |
| GKRRAFAFAK | ---   | ---   | ---   | SPKAAFAFAK | ••    | ---   | ---   |
| GRRRAFAFAK | ---   | ---   | ---   | SPKDAFAFAK | •     | ---   | ---   |
| GNKPAFAFAK | ••    | ---   | ---   | SPKKAFAFAK | ••••  | ---   | ---   |
| GNKVAFAFAK | •••   | ---   | ---   | SPKLAFAFAK | •••   | •     | ---   |
| GPKKAFAFAK | ••    | ••    | •••   | SPKNAFAFAK | ••    | ••    | ---   |
| GPKPAFAFAK | ••    | ••    | ••    | SPKPAFAFAK | ••    | ---   | ---   |
| GPKRAFAFAK | ••    | ••    | •••   | SPKQAFAFAK | ••    | •     | ---   |
| GPRAAFAFAK | ••    | ---   | ---   | SPKRAFAFAK | •••   | ••    | ---   |
| GPRPAFAFAK | ••    | ••    | ••    | SPKTAFAFAK | ••    | ---   | ---   |
| GSKVAFAFAK | •     | •     | •     | SPKVAFAFAK | •••   | ••    | •     |
| GSKKAFAFAK | •     | •     | ---   | SPRRAFAFAK | ••    | ---   | ---   |
| GSKRAFAFAK | ••    | •     | •     | SQKKAFAFAK | ---   | ---   | •     |
| MGKKAFAFAK | ---   | ---   | •     | SQKRAFAFSK | ••    | ---   | ••    |
| MKKRAFAFAK | ---   | ---   | ---   | SRKRAFAFSK | ---   | ---   | ---   |
| MKRFAFAFAK | ---   | ---   | ---   | SSKRAFAFAK | •     | •••   | •••   |

**Table S1.** NRMT *in vitro* methylation assay results. Sequences and relative abundances of synthetic peptides methylated by NRMT *in vitro*. --- = not detected, • = < 1%, •• = 1-<10%, ••• = 10-<50%, •••• = 50-<90%, ••••• = 90-100%. These peptides were confirmed with MS/MS and accurate mass analysis. To determine the relative abundances of each modified form of the peptide, the areas under the extracted ion chromatogram for each peptide in all of its charge states and modified forms were integrated and summed. The peak area for each modified form was divided by the total area for all unmodified and modified forms present for each peptide to obtain an estimate of the percent of each form of modified peptide.

**Table S2**

|          |          |          |          |          |
|----------|----------|----------|----------|----------|
| A-P-K-X- | G-G-K-X- | M-G-K-X- | P-P-K-X- | S-A-K-X- |
| A-P-R-X- | G-N-K-X- | M-N-K-X- |          | S-E-K-X- |
|          | G-P-K-X- | M-N-R-X- |          | S-M-K-X- |
|          | G-P-R-X- | M-P-K-X- |          | S-N-K-X- |
|          | G-S-K-X- | M-P-R-X- |          | S-P-K-X- |
|          |          |          |          | S-P-R-X- |
|          |          |          |          | S-Q-K-X- |
|          |          |          |          | S-S-K-X- |

**Table S2.** Sequence motifs of peptides methylated *in vitro* by NRMT. N-terminal sequences of peptides methylated *in vitro* by NRMT. This table summarizes table S1 where only positions 1-3 are considered.

**A**

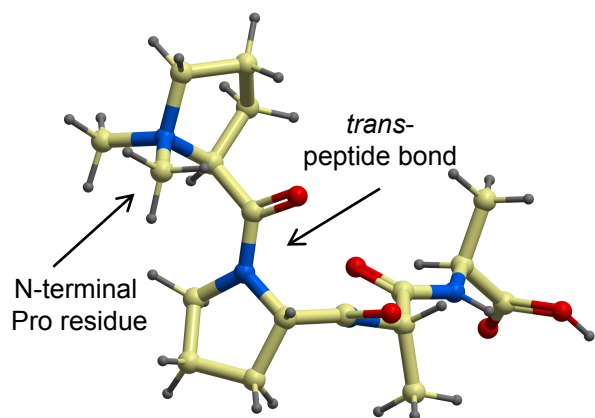

Model of N-terminally di-methylated tetrapeptide me2PPAA in *trans* Pro-Pro peptide bond conformation

**B**

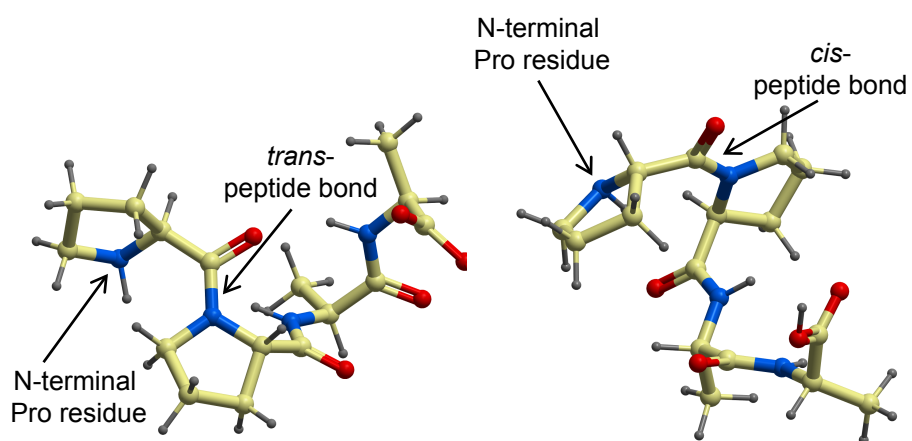

Model of non-methylated tetrapeptide PPAA in *trans* and *cis* Pro-Pro peptide bond conformation

**Supplementary Figure S1.** Addition of N-terminal methyl groups to first proline locks the N-terminally methylated Proline dipeptide in *trans* conformation.

A) A model of di-methylated tetrapeptide PPAA generated by ICM-Pro<sup>19</sup>. All 10 lowest energy conformers calculated by Marvin Suite ver. 5.9.2

(<http://www.chemaxon.com/products/marvin/marvinsketch/>) have the *trans* conformation of the Pro-Pro peptide bond. The lowest energy conformer is shown.

B) A model of non-methylated tetrapeptide PPAA generated by ICM-Pro. Ten lowest energy conformers were calculated by Marvin Suite ver. 5.9.2. Six of the calculated conformers were in *trans* conformation of the Pro-Pro peptide bond and 4 were found to be in *cis*. The lowest energy conformer for *trans* (left) and *cis* (right) are shown.

Fig.S2

A

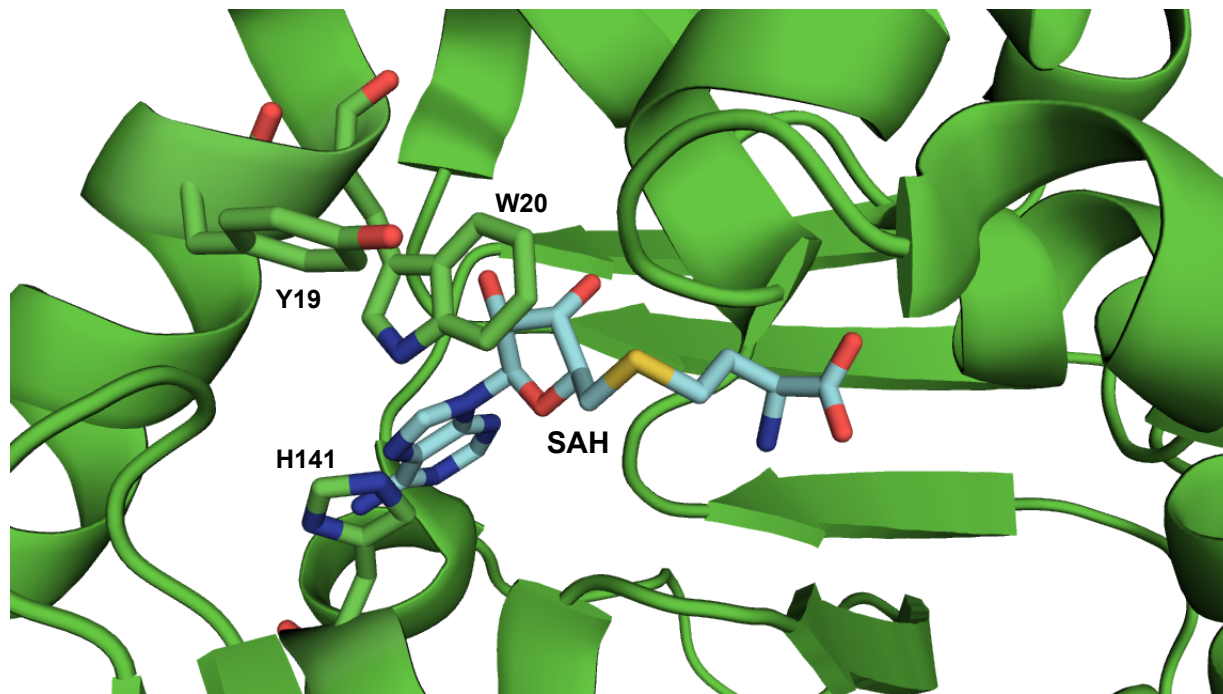

B

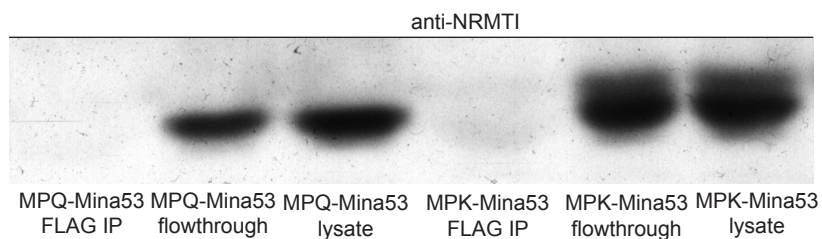

C

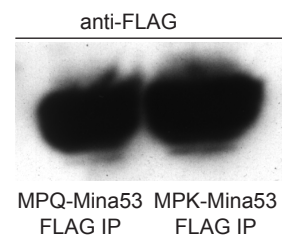

D

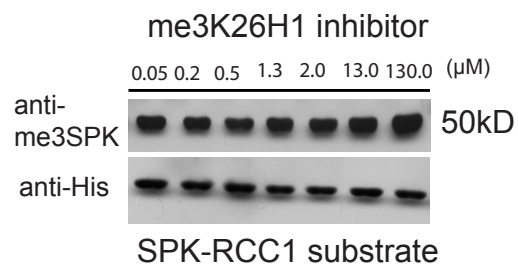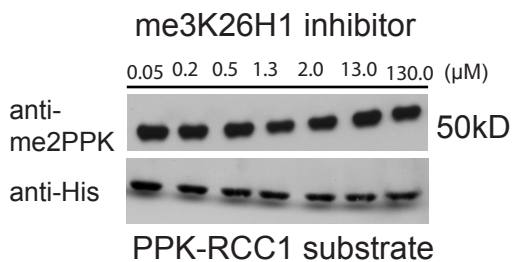

E

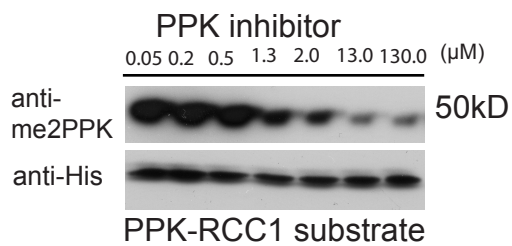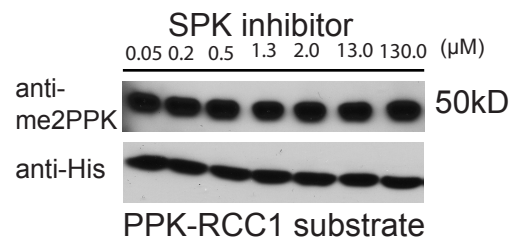

## Supplementary Figure S2.

A) Conserved aromatic residues in NRMT might form a chromodomain-like arrangement of aromatic residues and be responsible for binding of methylated peptides.

B) C-terminally FLAG-tagged overexpressed wild type and MPQ mutant of Mina53 does not bind endogenous NRMT. Both versions of C-terminally FLAG-tagged overexpressed Mina53 protein have initial methionine removed as showed by massspectrometry analysis (data not shown).

C) Both MPK- and MPQ-Mina53 FLAG-tagged proteins are efficiently expressed and immunoprecipitated.

D) NRMT catalyzed N-terminal methylation of SPK-RCC1 and PPK-RCC1 is not inhibited *in vitro* by histone H1 peptide containing tri-methylated lysine H1K26me3 (SPAKKKAT(Kme3)KAAGAG).

E) NRMT catalyzed N-terminal methylation of PPK-RCC1 can be inhibited by non-methylated PPKRIAKRRS peptide. SPKRIAKRRS peptide does not inhibit methylation of PPK-RCC1 *in vitro*.

Fig.S3

**A**

c'-type ions  
 me2-P P K K Q A Q A G G S K K A E Q K K K E K I E  
 z'-type ions

240 368 185 496 249 624 313 695 348 824 413 895 448 952 476 1009 505 1096 549 366 1224 613 409 1352 677 452 1423 712 475 1552 777 518 1680 841 561 1808 905 604 1936 969 646 2064 1033 689 2193 1098 732 2321 1162 775 2434 1218 813 2548 1275 850 2678 1340 894

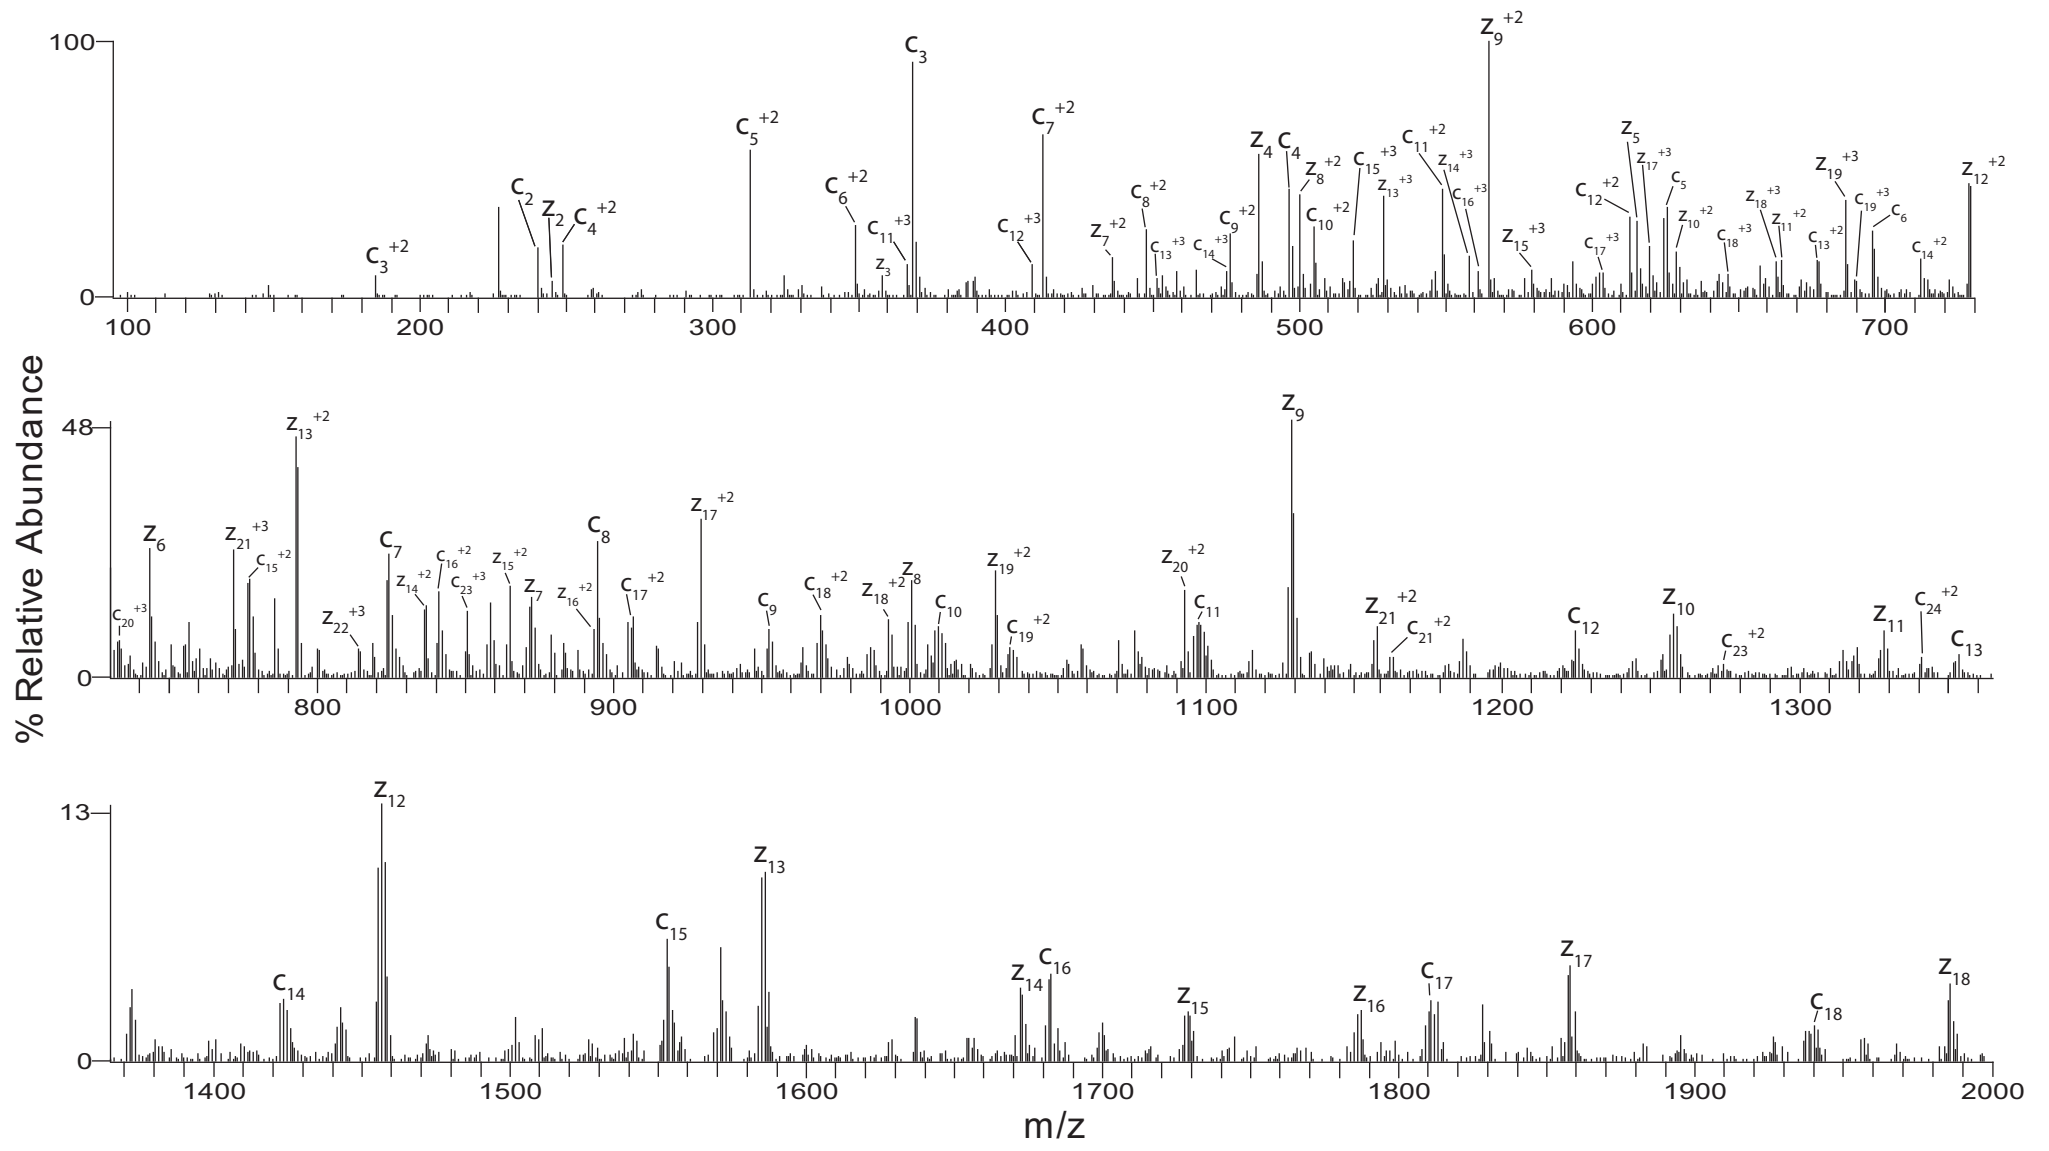



Fig.S3

**B**

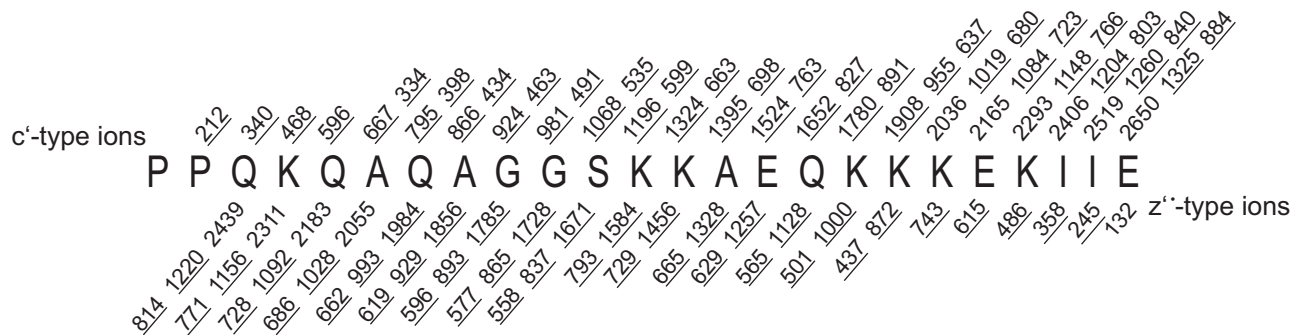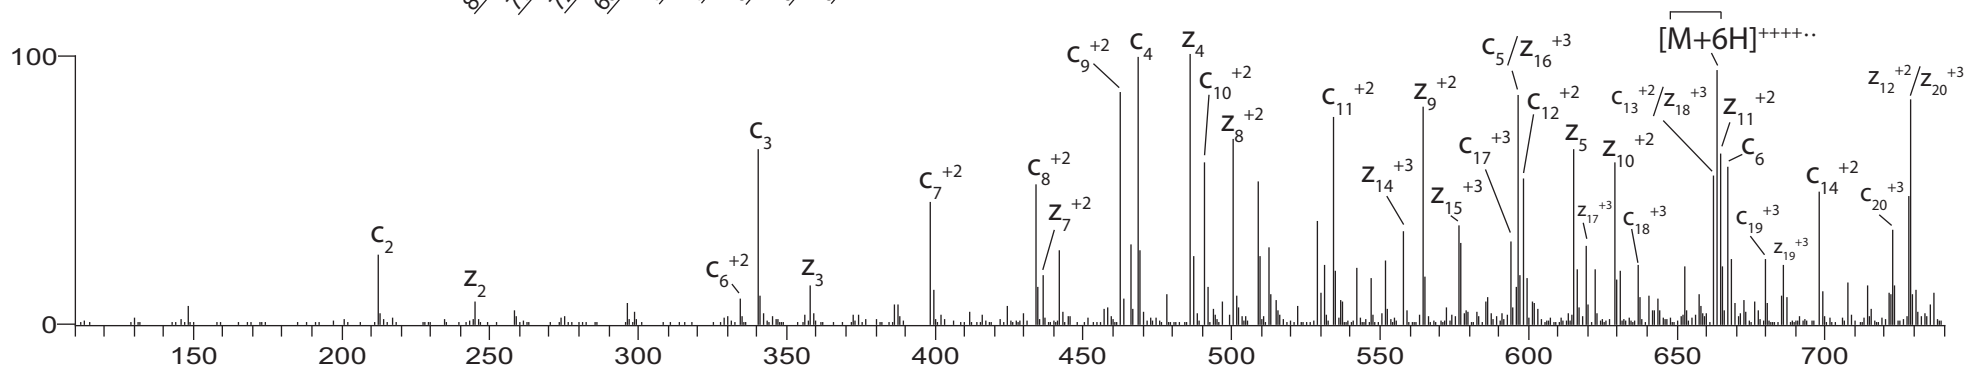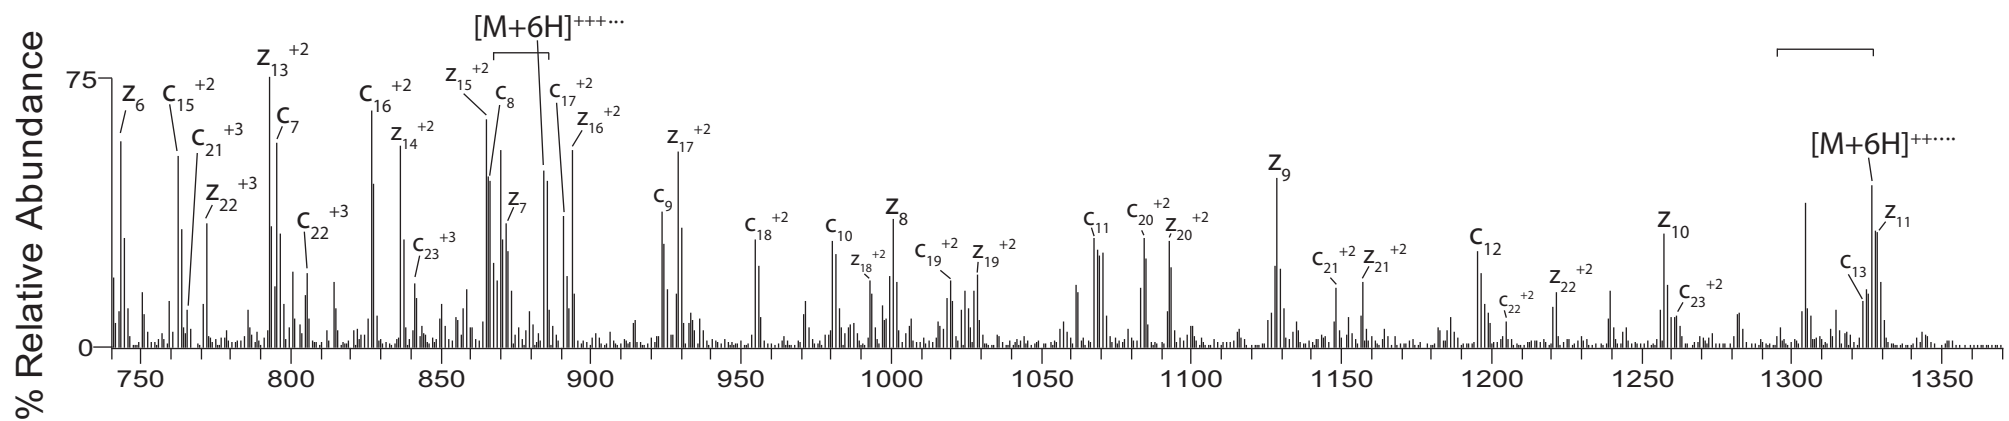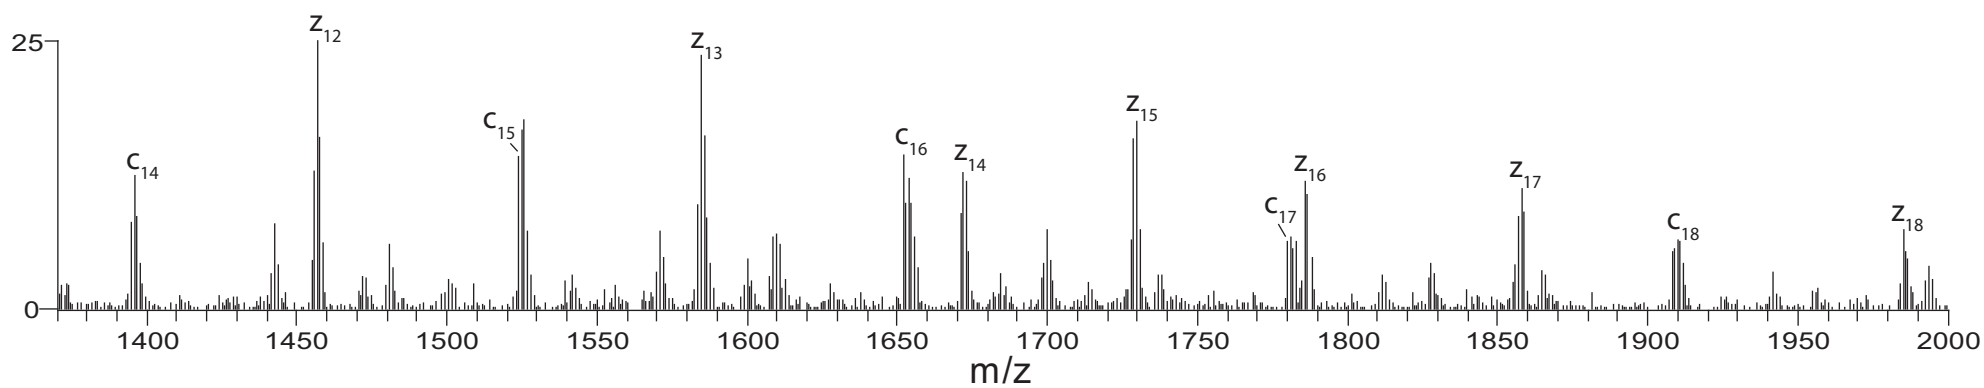

Fig.S3

C

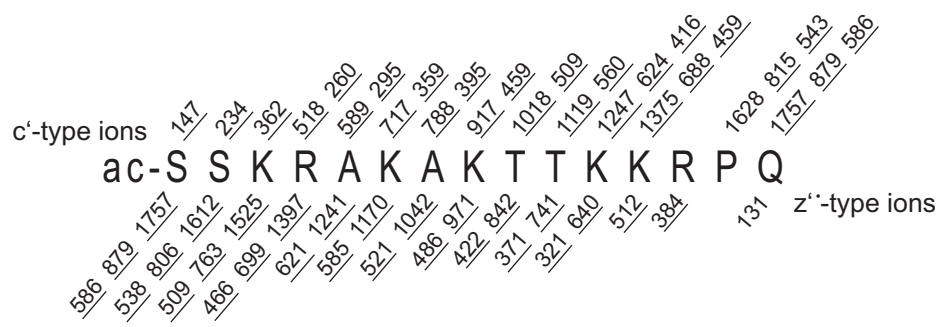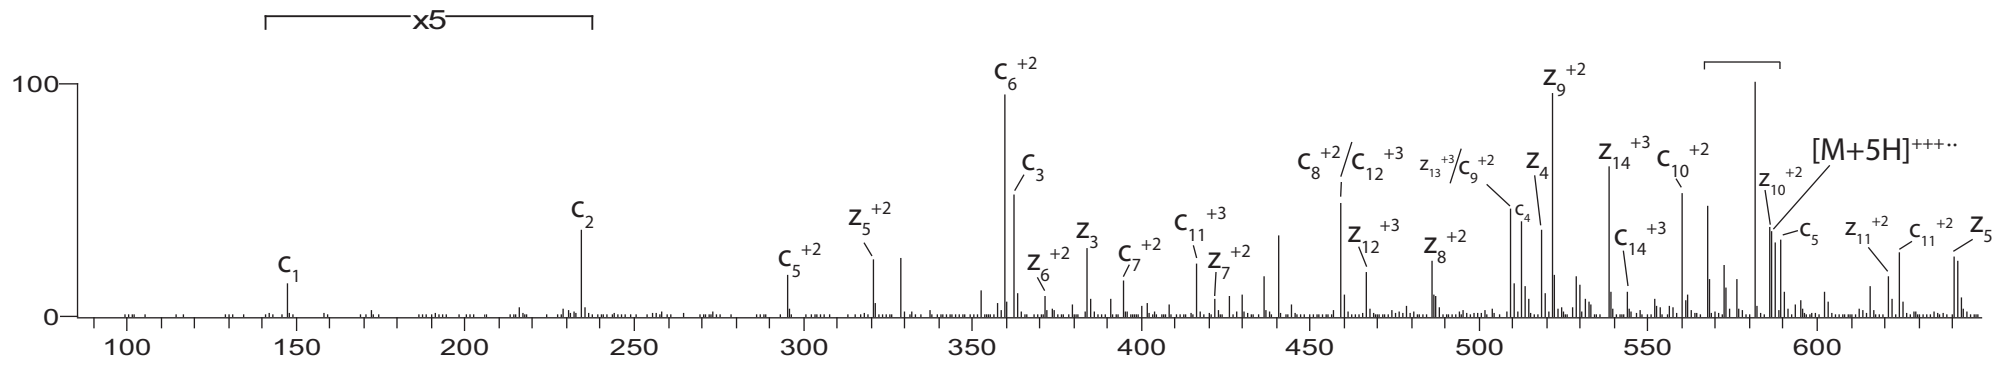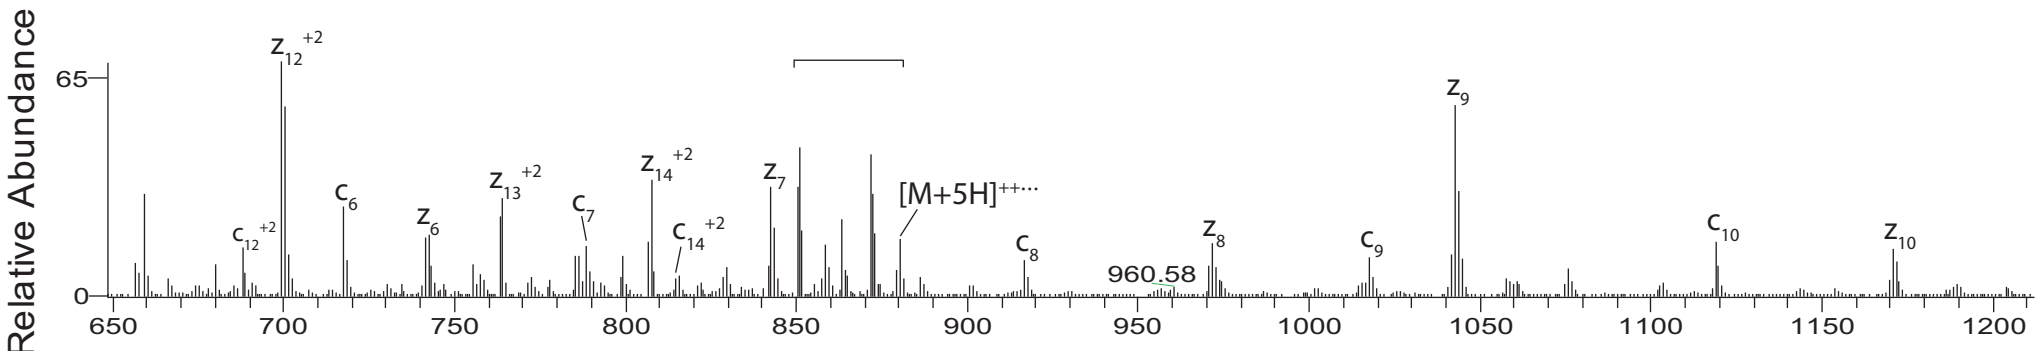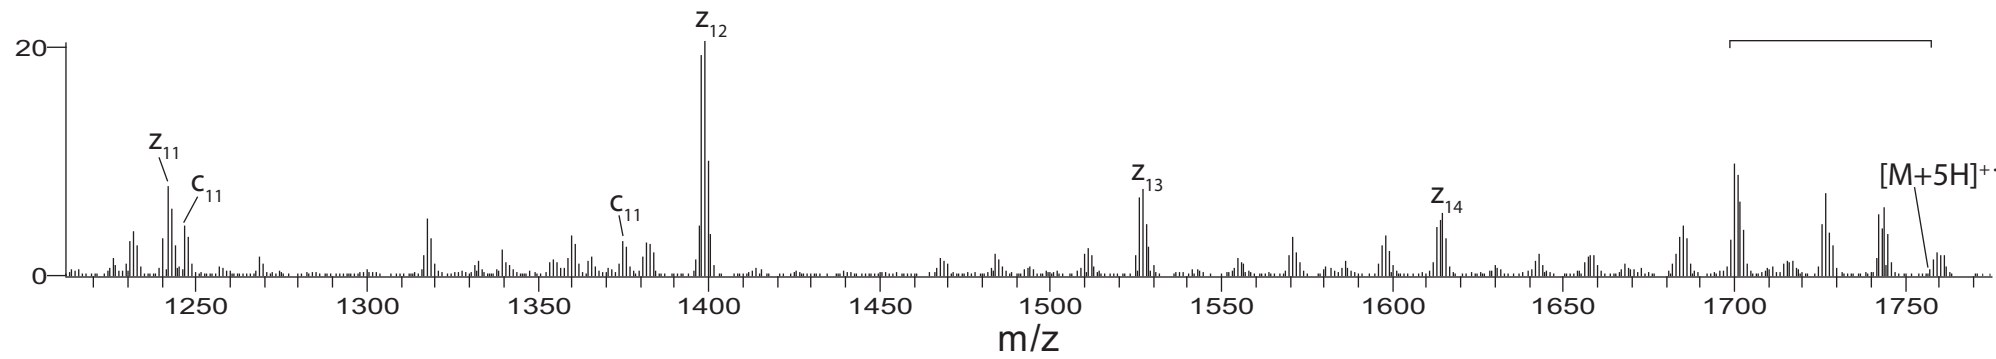

Fig.S3

D

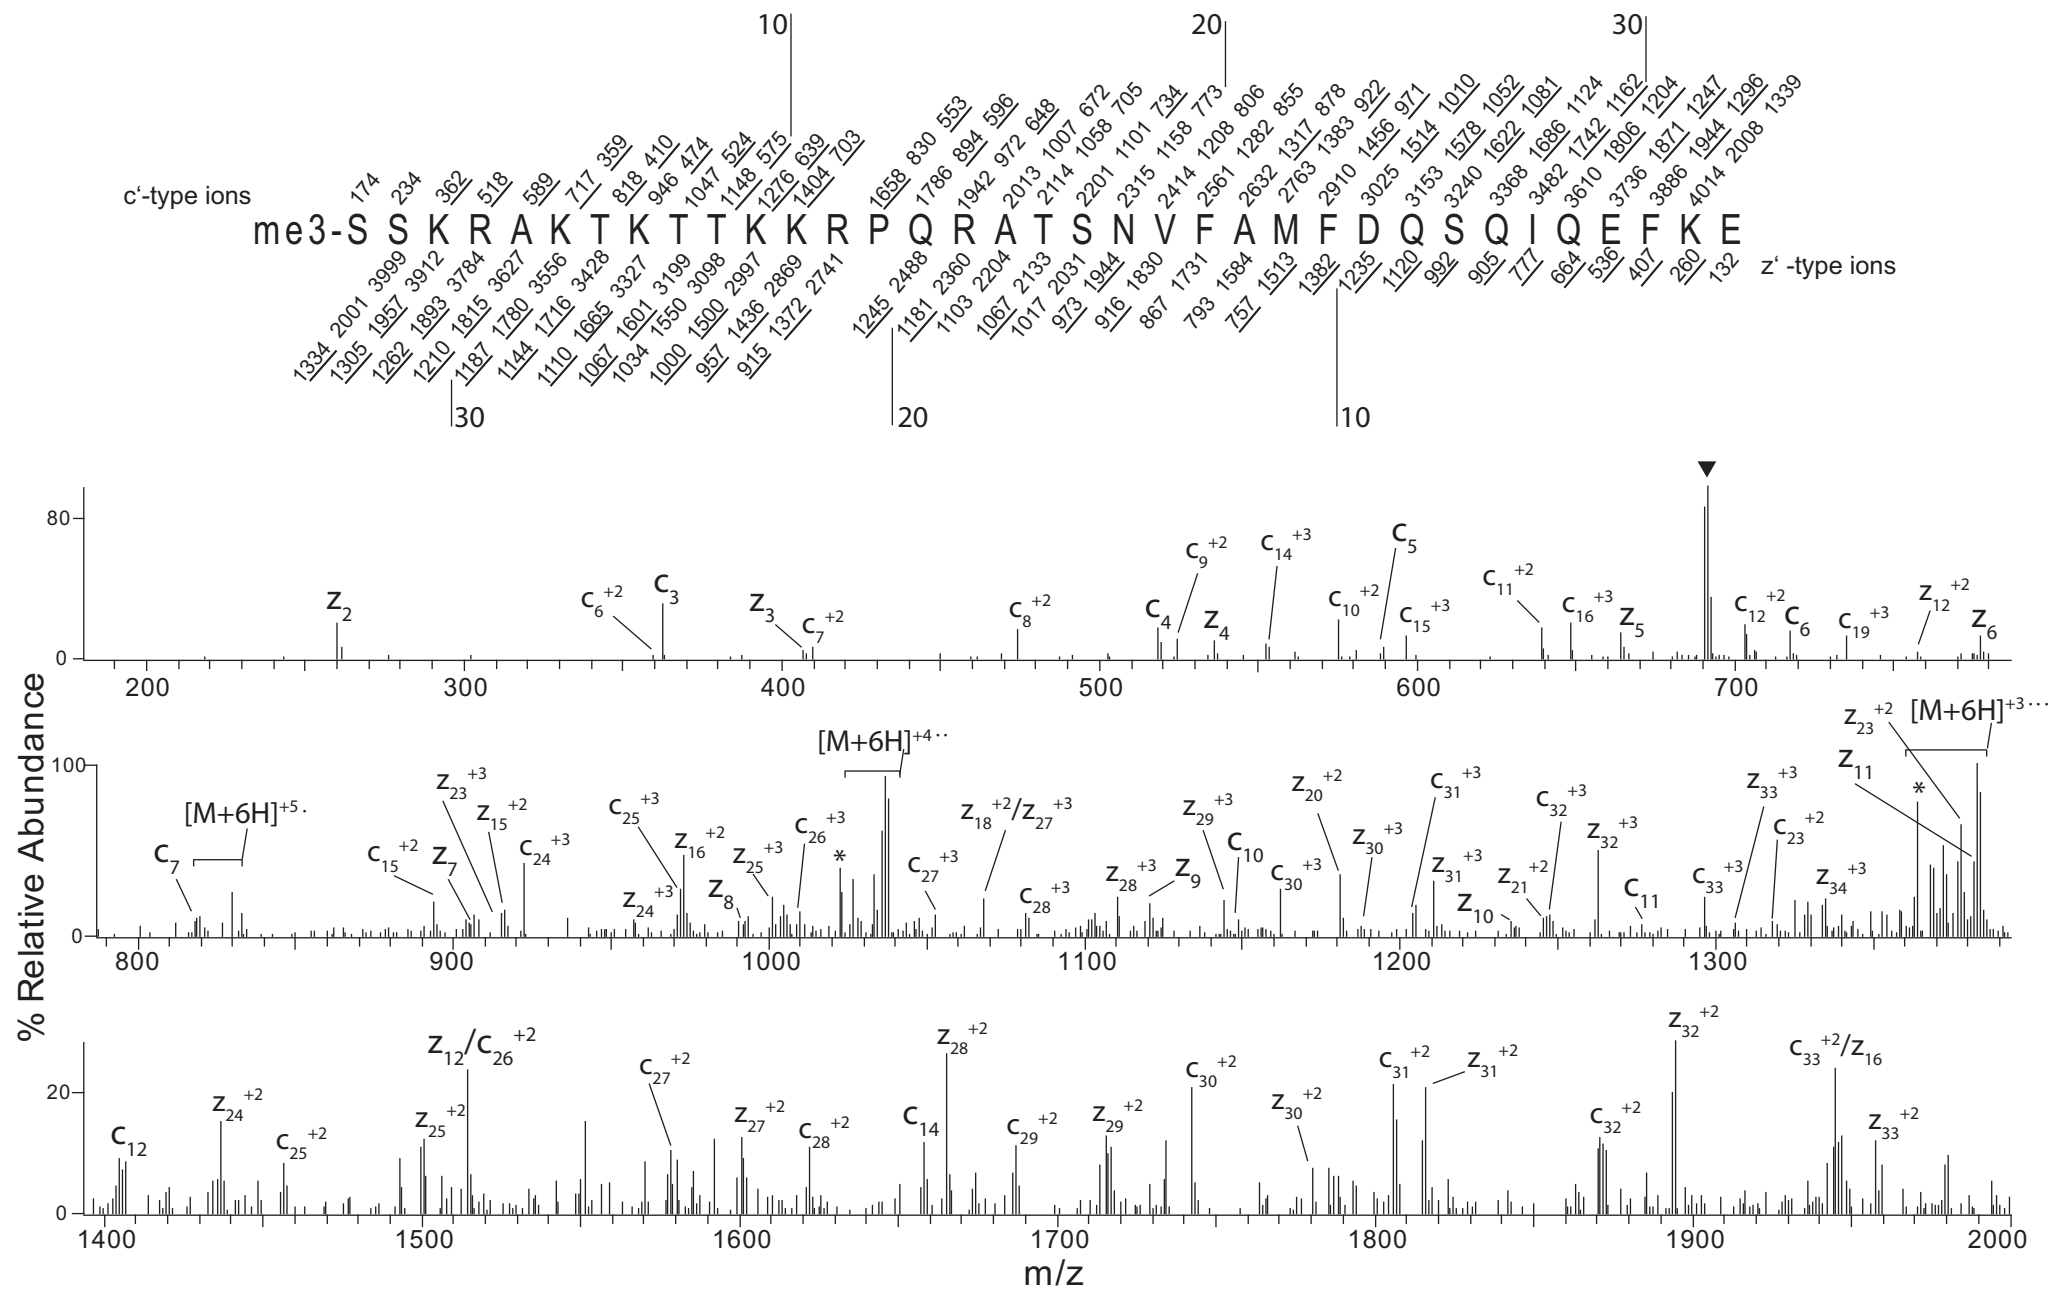

Fig.S3

**E**

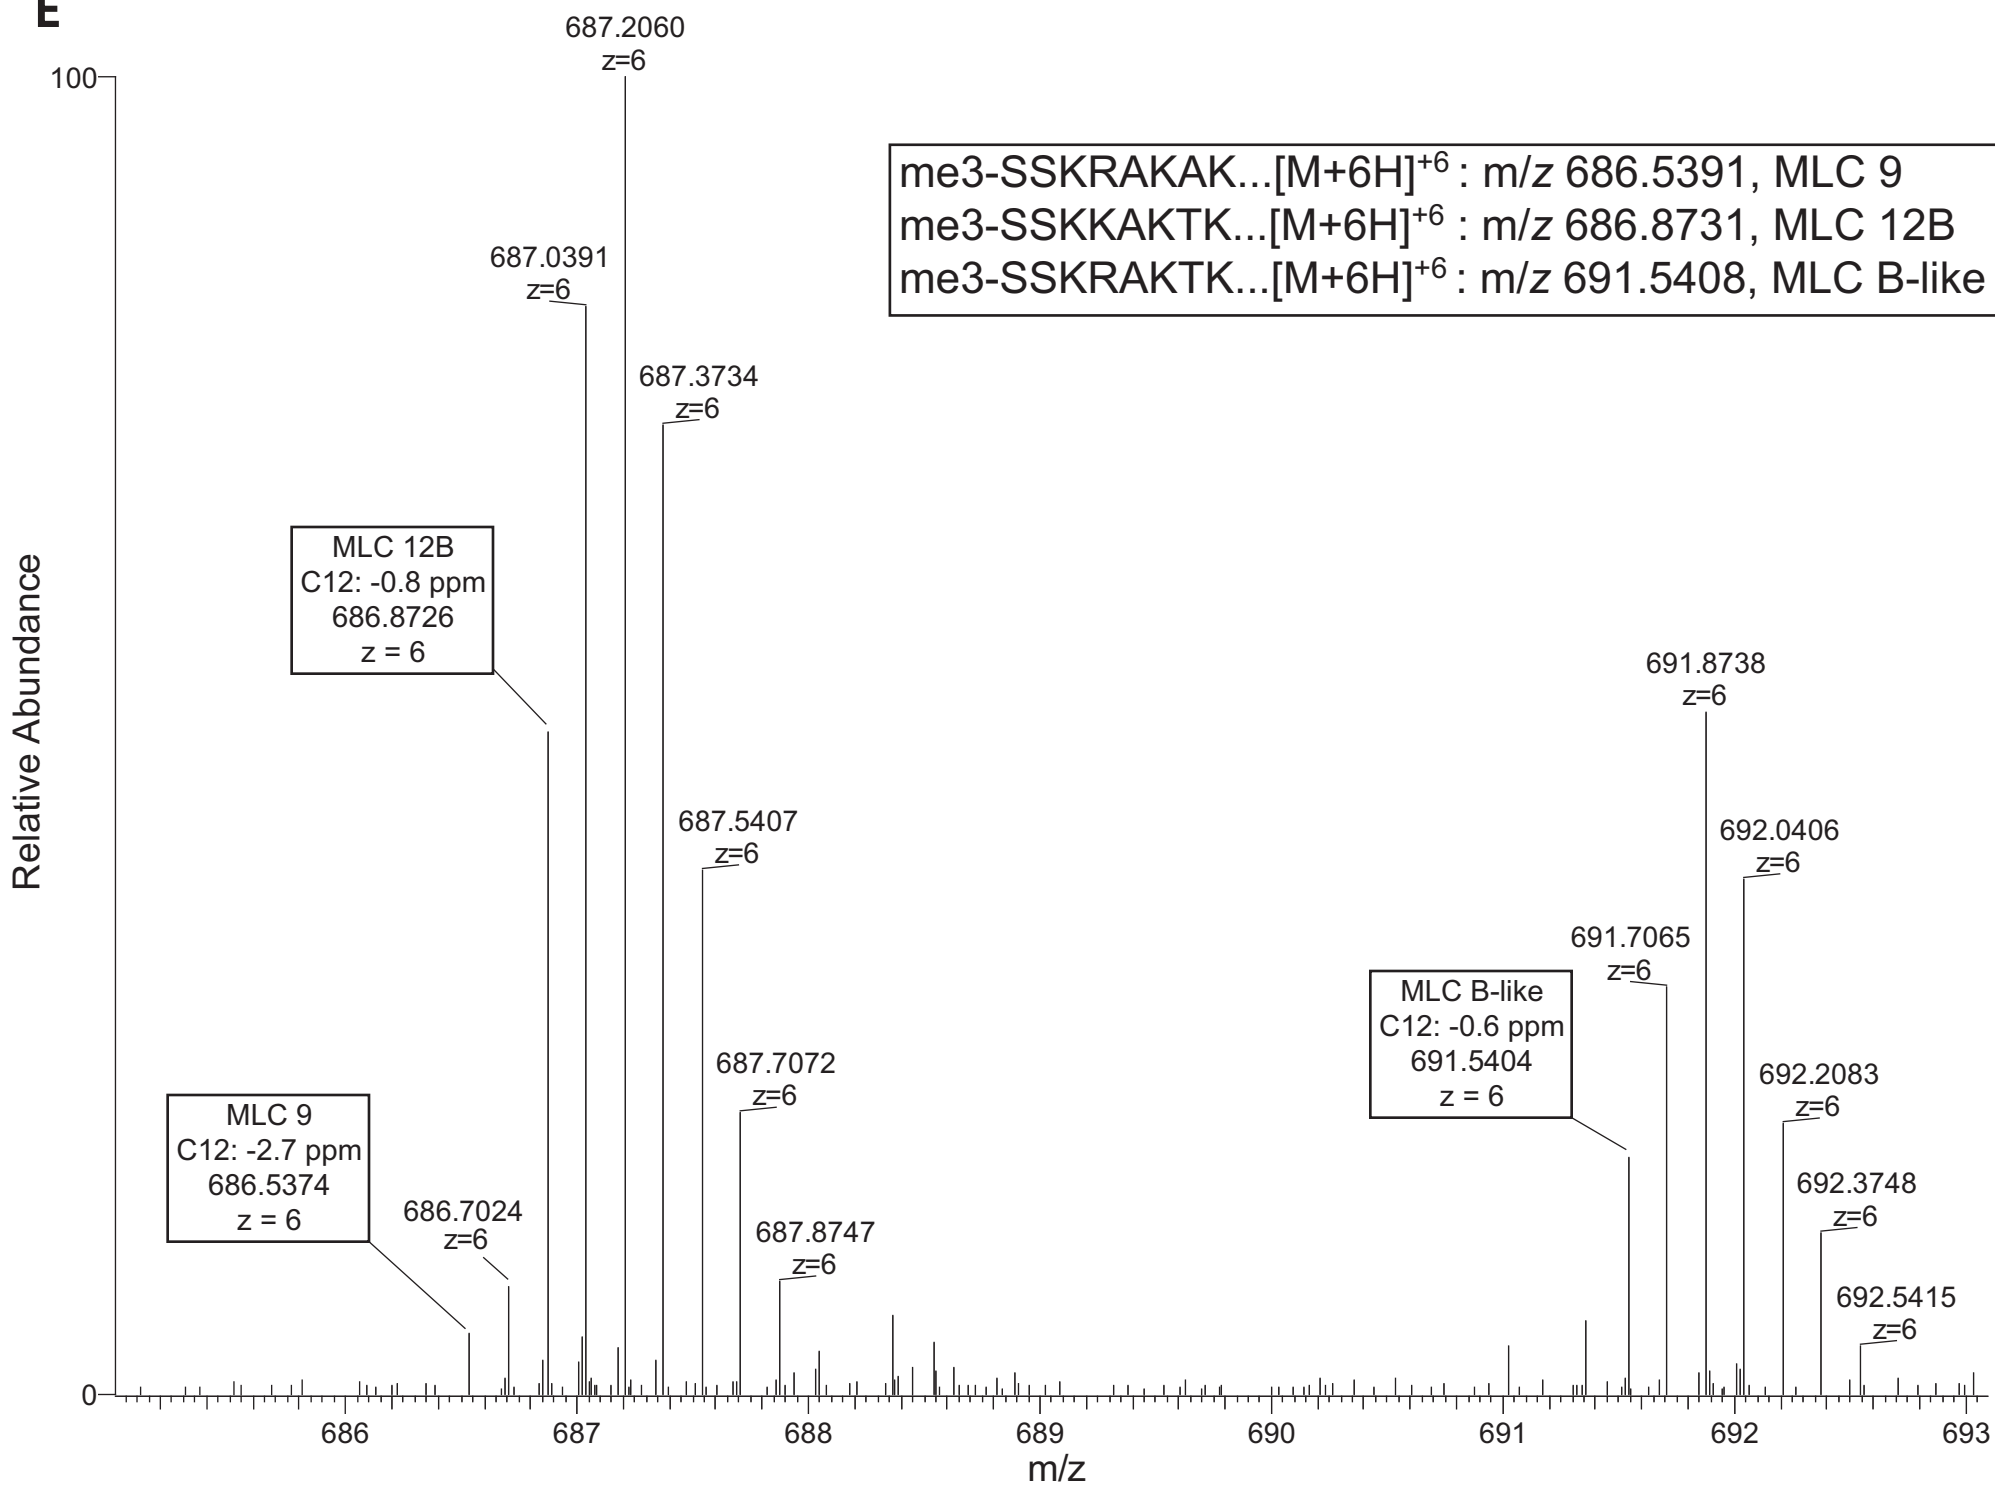

Fig. S3

**F**

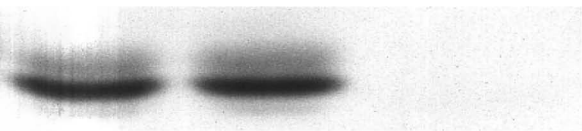

MLC9  
lysate

MLC9  
flowthrough

MLC9  
FLAG IP

NRMTI

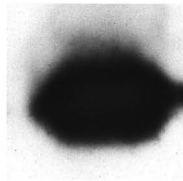

MLC9  
FLAG IP

FLAG

**Supplementary Figure S3.** Full MS and ETD MS/MS spectra of  $\alpha$ -N-terminal peptides from ZFP15 and MLCs.

A) ETD MS/MS spectrum recorded on the  $[M+7H]^{+7}$  ion ( $m/z$  383.5) corresponding to the 24-residue, endoproteinase GluC-generated N-terminally methylated peptide of ZFP15. The accurate mass measurement using an LTQ-FTMS ( $m/z$  383.3740<sup>+7</sup>) and calculated mass ( $m/z$  383.3737<sup>+7</sup>) are within 0.8 ppm. Monoisotopic masses rounded to the nearest integer for c'- and z'-type ions are shown above and below the peptide sequence and are underlined where identified in the spectrum. Ions in the spectrum are labeled accordingly. Note that in addition to dimethylation of the alpha-N-terminal of ZFP15, unmodified (9%) and monomethylation (15%) were also detected (data not shown).

B) ETD MS/MS spectrum recorded on the  $[M+6H]^{+6}$  ion ( $m/z$  442.6) corresponding to the 24-residue, endoproteinase GluC-generated N-terminal peptide of the PPQ-ZFP15. The accurate mass measurement ( $m/z$  442.4239<sup>+6</sup>) and calculated mass ( $m/z$  442.4235<sup>+6</sup>) are within 1.0 ppm. Reduced charge species are labeled; ions corresponding to neutral losses from these species are represented by brackets. Note that in addition to the unmodified  $\alpha$ -N-terminus of ZFP15 PPQ mutant, monomethylation (6%) was also detected (data not shown).

C) ETD MS/MS spectrum recorded on the  $[M+5H]^{+5}$  ion ( $m/z$  352.2) corresponding to the 15-residue, GluC-generated N-terminally acetylated peptide of MYL9 (MLC 9) immunoprecipitated from 293LT cells. The accurate mass measurement using an LTQ-FTMS ( $m/z$  352.5960) and calculated mass ( $m/z$  352.2159<sup>+5</sup>) are within 0.3 ppm. No other forms of this peptide were detected.

D) ETD MS/MS spectrum recorded on the  $[M+6H]^{+6}$  ion ( $m/z$  691.9) corresponding to the 34-residue, GluC-generated N-terminally trimethylated peptide of MLC, regulatory B-like protein

from mouse spleen tissue lysate. The accurate mass measurement using an LTQ-FTMS ( $m/z$  691.5404<sup>+6</sup>) and calculated mass ( $m/z$  691.5408) are within 0.6 ppm. The inverted triangle (▼) designates ions that fall within the precursor isolation window; corresponding reduced charge species are labeled with an asterisk (\*).

E) Full MS spectrum containing three coeluting GluC-generated peptides from mouse spleen tissue lysate of MLC isoforms that contain N-terminal SSK trimethylation. MS/MS analysis of MLC 12B and MLC B-like confirmed N-terminal methylation while MLC 9 was identified by accurate mass measurements.

F) C-terminally FLAG-tagged MLC9 overexpressed in 293LT cells does not IP endogenous NRMTI.

**List of possible NRMTI substrate proteins. Predictions made on the basis of Peptide Library Screen results**

**MAPR**

>gi|319738616|ref|NP\_001188356.1| disheveled-associated activator of morphogenesis 2 isoform 1 [Homo sapiens]

MAPRKRSHHGLGFLCCFGGSDIPEINLRDNHPLQFMFESSPIPAEELNIRFAELVDELDTLTKNREAMF  
ALPPEKKWQIYCSKKKEQEDPNKLATSWPDYYIDRINSMAAMQSLYAFDEEETEEMRNQVVEDLKTALRTQ  
PMRFVTRFIELEGLTCLLNFLRSMDHATCESRIHTSLIGCIKALMNNSQGRAHVLAQPEAISTIAQSLRT

>gi|49456999|emb|CAG46820.1| interleukin-15 receptor subunit alpha isoform 1 precursor [Homo sapiens]

MAPRRARGCRTLGLPALLLLLLRPPATRGITCPPPMSVEHADIIWVKSYSLSRERYICNSGFKRKAGTS  
SLTECVLNKATNVAHWTTPSLKCIRDPAVHQRFAPPSTVTTAGVTPQFESLSPSGKEPAASSPSSNNTA  
ATTAAIVPGSQLMPSKSPSTGTTEISSHESHGTPSQTTAKNWELTASASHQPPGVYPQGHSDTTVAIST

>gi|29650893|gb|AA086774.1| MHC class Ib antigen [Homo sapiens]

MAPRLLLLLLSGALALTDTWAGSHSLRYFSTAVSRPGRGEPRIYAVEYVDDTQFLRFDSDAAI PRMEPRE  
PWVEQEGPQYWEWTTGYAKANAQTDRVALRNLLRRYNQSEAGSHTLQGMNGCDMGPDRLLRGRYHQHAYD  
GKDYISLNEDLRSWTAADTVAQITQRFYEAEEYAEFEFTYLEGECLELLRRYLENGKETLQRADPPKAHV

>gi|2769649|emb|CAA04632.1| NIPSNAP1 protein [Homo sapiens]

MAPRLCSISVTARRLLGGPGPRAGDVASAAAARFYKDNESWFRSLFVHKVDPKDAHSTLLSKKETS  
NLYKIQFHNVKPEYLDAYNSLTEAVLPKLHLDELDYPCSLVGNWNTWYGEQDQAVHLWRFSGGYPALMDCMN  
KLKNNKYLEFRFRERTQMLLSRRNQLLELFSFWNEPQPRMGPNIEYELRKYKLPKPGTMIEWGNWARAIKY

>gi|28193156|emb|CAD62320.1| dishevelled associated activator of morphogenesis 1 [Homo sapiens]

MAPRKRGRGISIFCCFRNNDHPEITYRLRNDNSNFALQTMEPALPMPVVEELDMVFSELVDELDTDKH  
REAMFALPAEKKWQIYCSKKKQENKATSWPEFYIDQLNSMAARKSLLALEKEEEEEERSKTIESLKT  
LRTKPMRFVTRFDLIDLGLSCILNFKLMDYETSESRIHTSLIGCIKALMNNSQGRAHVLAHSESINVIAQ

>gi|123239958|emb|CAI17044.2| collagen type XV alpha 1 [Homo sapiens]

MAPRRNNGQCWCLMLLVSSTPLPAVTQTRGATETASQGHLDLTLQIGVPLPSSVSFVTGYGGFPAYSFG  
PGANVGRPARTLIPSTFFRDFAISSVVVKPSSTRGGVLAITDAFQKVIYLGRLSGVEDGHQRILLYTE  
PGSHVSQLAAAFVPMVTHRWNRFAMIVQGEVTLVNCEEHSRIPFQRSSQALAFESSAGIFMGNAGAT

>gi|38016935|ref|NP\_078905.2| centromere protein U [Homo sapiens]

MAPRGRRRPRPHRSEGARRSKNTLERTHSMKDKAGQCKPIDVDFDPDNDVSSIGRLGENEKDEETYET  
FDPPLHSTAIYADEEEFSKHCGLSLSSSTPPGKEAKRSSDTSNGEASEIESVKISAKKPKRKLRFISDDSE  
SIEESDTRRKVKSAEKISTQRHEVIRTASSELSKPAESVTSKKTGPLSAQPSVEKENLAIESQSKTQK

>gi|62896657|dbj|BAD96269.1| cell division cycle associated 8 variant [Homo sapiens]

MAPRKGSSRVAKTNSLRRLKLAFLKDFDREVEIRIKQIESDRQNLLKEVDNLYNIEILRLPKALREMNV  
LDYFALGGNKQALEEAATADLDITEINKLTAEAIQTPLKSAKTRKVIQVDEMIVEEEEEENERKNLQTA  
RVKRCPPSKKRTQSIQKGGKGRSSRANTVTPAVGRLEVSMVKPTPGLTPRFDSRVFKTPGLRTPAAGER

>gi|50513185|gb|AAT77785.1| insulin growth factor-like family member 1 [Homo sapiens]

MAPRGCIVAVFAIFCISRLLCSHGAPVAPMTPYLMLCQPHKRCGDKFYDPLQHCYDDAVVPLARTQTCG  
NCTFRVCFEQCCPWTFMVKLINQNCDSARTSDDRLCRSVS

>gi|119621049|gb|EAX00644.1| elastin microfibril interfacier 1, isoform CRA\_a [Homo sapiens]

MAPRTLWSCYLCCLLTAAGAASYPFRGFSLYTGSSGALSPPGGPQAQIAPRPASRHRNWCAAYVVTRTVSC  
VLEDGVETVYKYQPCAWGQPQCPQSIMYRRFLRPRYRVAYKTVTDMEWRCQQYGGDDCAESPAPALGPA  
SSTPRPLARPARPNLSGSSAGSPLSGLGEGEPGESEKVVQLEEQVQSLTKELQGLRGLVQLQGLSGLRAEDV

>gi|13905004|gb|AAH06784.1| Ribosomal protein S14 [Homo sapiens]

MAPRKGKKEKKEEQVISLGFQVAEGENVFGVCHIFASFNDTFVHVTDLSGKETICRVVTGGMKVKADRDESS  
PYAAMLAQDVQRCKELGITALHIKLRATGGNRTKTPGPGAQALRALARSGMKIGRIEDVTPIPSDST  
RRKGRRGRRL

>gi|66267178|gb|AAH94693.1| Zinc finger, MYND-type containing 17 [Homo sapiens]

MAPRRRRRHHKPPSSVAPIIMAPTITVTPVPLTPSKPGPSIDTLGFFSLDDNVPGLSQLILQKLNMKSY  
EYKLVVDGGTPVSGFGRCPQEMFQRMEDTFRFCAHCRALPSGLSDSKVLRHCKRCRNVYCGPECQKS  
DWAHRRVCQELRLVAVDRLMEWLLVTGDFVLPSPGPWPPEAVQDWDWSWFSMKGLHLDATLDAVLVSHA

>gi|11138667|gb|AAG31443.1|AF244355\_1 secretin [Homo sapiens]

MAPRLLLLLLLLLGGSAARPAPRRARRSDGTFTSELSRLREGARLQRLQLQGLVGRSEQDAENSMWTR  
LSAGLLCPSGSNMILQAWMPLDGTWSPWLPVPPGPMVSEPAAGAAEGTLRPR



>gi|460703|dbj|BAA04762.1| alpha 1(XV) collagen chain [Homo sapiens]  
MAPRRNNGQSWCLMLLSVSTPLPAVTQTRGATETASQGHLDLTQLIGVPLPSSVSFVTGYGGFPAYSFG  
PGANVGRPARTLIPSTFFRDFAIRAVVKPSSSTRGGVLAITDAFQKVIYLGRLSGVEDGHQRIILYYTE  
PGSHVSQEAFAAFVPMTHRWRFAMIVQGEVTLVNCHEHSRIPFQRSSQALAFESSAGIFVGNAGAT

>gi|62896567|dbj|BAD96224.1| low density lipoprotein receptor-related protein associated protein  
1 variant [Homo sapiens]  
MAPRRVRSFLRGLPALLLLLLLFLGPWPAASHGGKYSREKNQPKPSPKRESGEEFRMEKLNQLWEKAQRLH  
LPPVRLAELHADLKIQRDELAWKKLKDGLDEDEGEKEARLIRNLNVLAKYGLDGKDKARQVTSNLSG  
TQEDGLDDPRLEKLWHKAKTSGKFSGEELDKLWREFLHHKEKAHEYVLETLRSRTEEIHENVISPSDLS

gi|146094506|ref|NP\_001078868.1| RELT-like protein 1 precursor [Homo sapiens]  
MAPRALPGSAVLAFAAVFVGGAVSSPLVAPDNGSSRRTLHSRTEPTPSPNDTGNHPEYIAYALVPVFFIM  
GLFGVLICHLKKKGYRCTTEAQDIEEEKVEKIELNDSVNENS DTVGQIVHYIMKNEANADVLMKAMVAD  
NSLYDPESFVTPSTPGSPVSPGLSPGGTGGKHCVCGHLLHTVGGVVERDVCRCRHRKRWFIKPTNKS

>gi|58477551|gb|AAH89445.1| arylsulfatase J protein [Homo sapiens]  
MAPRGCAGHPPPPSPQACVCPGKMLAMGALAGFWILCLLTYGYSWQALEEEEEGALLAQAGEKLEPST  
TSTSQPHLIFILADDQGFDRDVGYHGSEIKPTLTKLAAEGVKLENYVQPICTPSRSQFITGKYQIHTGL  
QHSIIRPTQPNCLPLDNATLPQKLKEVGYSTHMVGKWLHGFYRKECMPTRRGFDTFGSLGSGDYTHY

>gi|152013060|gb|AAI50281.1| Plexin D1 [Homo sapiens]  
MAPRAAGAPLSARAAAASPPFPQTTPRCVPVLLLLLLGAARAGALEIQRRFPSPTNNFALDGAAGT  
VYLAAVNRLYQLSGANLSLEAEAAVGPVPSPLCHAPQLPQASCEHPRRLTDNKNKILQLDPGQGLVVVC  
GSIYQGFQQLRRRGNISAVAVRFPAPPAEPVTVFVPSMLNVAANHPNASTVGLVLPAAAGAGSRLLVG

>gi|2039362|gb|AAB81537.1| UDP-glucuronosyltransferase 1A10 [Homo sapiens]  
MAPRRVDQPRSFMCVSTADLWLCEAGLLVVPMDGSHWFAMQSVVEKLIILRGHEVVVVMEVSWQLERSL  
NCTVVKTYSTSYTLEDQNRFMVFAHAQWKAQAQSI FSLMSSSSGFLDLFFSHCRSLFNDRKLV EYLKES  
SFDVAVFLDPFDTCGLIVAKYFSLPSVVFTRGIFCRHLEEGAQCFAPLSYVPNDLLGFSDAMTFKERVVNH

>gi|2612918|gb|AAB86809.1| receptor activator of nuclear factor-kappa B [Homo sapiens]  
MAPRRRRRPLFALLLLCALLARLQVALQIAPPCTSEKHYEHLGRCCNKCEPGKYMSSKCTTSDSVCLP  
CGPDEYLDWNEEDKCLLHKVCDTGKALVAVVAGNSTTPRRCCTAGYHWSQDCECCRRNTECAPGLGAQ  
HPLQLNKDITVCKPCLAGYFSDAFSSDCKRCPWTNCTFLGKRVEHHGTEKSDAVCSSSLPARKPPNEPHVY

>gi|2920537|gb|AAC39659.1| type XVIII collagen [Homo sapiens]  
MAPRCPWPWPRRRRLDVLAPLVLLGVRAASAEPERISEEVGLLQLLGDPPPQVVTQDDPDVGLAYVF  
GPDANSQVARYHFPSLFRDFSLFHIRPATEGPGVLFADTSAQAMVLLGVKLSGVQDGHQDISLTYT  
EPGAGQHTAASFRLPAFVQWTHLALS VAGGFVALYVDCEEQRMPLARSSRGLLELEPGAGLFVAQAGG

>gi|34783244|gb|AAH21122.2| selenoprotein H [Homo sapiens]  
MAPRGRKRKAEAAVVAVAEKREKLANGGEGMEATVVEHCTSURVYGRNAAALSQALRLEAPELPVKVN  
PTKPRRGSFEVTLRPDGSSELWTGIKKGPPRKLKFPPEPQEVVEELKYL

>gi|149274610|ref|NP\_612387.1| ferredoxin-fold anticodon-binding domain-containing protein 1  
[Homo sapiens]  
MAPRRLLLVGEGNFSFAALSETLDQSTQLTATCLQRPAELARDPLAWENLQCLRREGIDVRFVGDCTQL  
ADVFEHLHEREFDQIYFIFPHCGRKAGVAKNRELLAKFFQSCADVLAEEGEVHVALCRGQGGTADKPKQRE  
WHNSWQVVAMAALGGLILSDVYFSCKAVAGYKCTGYRSQDKSFHVEGALNHIFTRSLPFEGSQPRIFRI

>gi|31657142|ref|NP\_852478.1| integrin alpha-1 precursor [Homo sapiens]  
MAPRPRARPGVAVACCWLLTVLVRCCVSNVDVKNSMTFSGPVEDMFGYTVQQYENEEGKWWLIGSPLVG  
QPKNRTGVDVYKCPVGRGESLPCVKLDLPVNTSIPNVTEVKENMTFGSTLVNTNPGGFLACGPLYAYRCGH  
LHYTTGICSDVSPTFQVNSIAPVQECSTQLDIVIVLDGSNSIYPWDSVTAFLNDLLERMDIGPKQTQVG

>gi|51491223|emb|CAH18677.1| Sel-1-like repeats containing protein [Homo sapiens]  
MAPRPPKQPDKNPLHGRELNVVPSLGRQTSLTTSVIPKAEQSVAYKDFIYFTVFEENVRNVSEVSEYLC  
SQPCVVNLEAVSSEFRSSIPVYKRWKNEKHLHTRTQIVHVKFPSIMVYRDDYFIRHSISVSAVIVRA  
WITHKYSGRDWNVWKEENLLHAVAKNYTLLQTIPPFERPFKDHQVCLEWNMGYIWNLRANRIPQCPLND

>gi|30315217|gb|AAP30832.1|AF502942\_1 ubiquitin-specific protease 31 [Homo sapiens]  
MAPRLQLEKAAWRWAETVRPEEVSQEHIEYAIWLEPCIRGVCRRNCKGNPNCLVIGEGHIWLG EIDEN  
SFHNIDDPNCERRKNSVFNLGNLGCATCYVNTFLQVWFLNLELRQALYLCPTCSDYMLGDDGIEQEEKDYE  
PQTICEHLQYLFALLQNSNRRYIDPSGFVKALGLDTGQQQDAQEFKSKLFMSLLEDTLKQKNPDVRNIVQ

>gi|37589537|gb|AAH59361.1| ADP-ribosylation factor-like 10 [Homo sapiens]  
MAPRPLGLVLVALGGAAVLGSVLFILWKTYFGRGRERRWDRGEAWWGAEAAARLPEWDEWDEDEDEE  
ALEELEQREVLVGLDAGKSTFLRVLSGKPPLEGHIPWGFNSVRLPTKDFEVDLLEIGGSQNLRFYWK  
EFVSEVDVLFVVDADRLRLPWARQELHKLKLDKDPDLPVVVVANKQVRAVRGQLGPGDIHSEMLEQQG

>gi|5420181|emb|CAB46612.1| HLA-G histocompatibility antigen, class I, G [Homo sapiens]  
MAPRTLFLLLSGALTLTETWAGSHSMRYFSAAVSRPGRGEPFIAMGYVDDTQFVRFDSDSACPRMEPRA  
PWVQEYQEGPEYWEETRNTKAHAQTDRMNLQTLRGYYNQSEASSHTLQWIMIGCDLGSGRLLRGYEQYAYD  
GKDYLALEDLRSWTAADTAAQISKRKCEANVAEQRRAYLEGTCVEWLHRYLENGKEMLRADPPKTHV

>gi|37782462|gb|AAP34477.1| RNA binding motif (RNP1, RRM) protein 3 [Homo sapiens]  
MAPRTWCAGIFGLFCPLTLACSSLTIALTDCQPIILVSPTLSLWMVVRVWIMQASLLGEPPEVALGPM  
GVVAATLEVVGTRAMGVAGIMTVLEGMMDMDVPETIMAETRVVMTATQEEITETIMTEMRHAHNIDT  
QGIISDPGSSFMVAFKVFGAALKHLIL

>gi|197382841|ref|NP\_660355.2| zinc finger protein 485 [Homo sapiens]  
MAPRAQIQGLPTFGDVAVAFTRIEWRHLDAARALYRDVMLENYGNLVSVGLLSSKPKLITQLEQGAEPW  
TEVREAPSGTHAVEDYWFETKMSALKQSTSEASVLGERTKSMMEKGLDWEGRSSTTEKNYKCEKCGVFK  
YNSSFISHQRNHTSEKPHKCEKCGIAFMNSSSLNHHKVVHAGKQPYRCIECGFLKKHSTFINHQRIHSR

### **MGPR**

>gi|20142333|gb|AAM12239.1| taste-specific G-protein coupled receptor T1R2 [Homo sapiens]  
MGPRAKTICSLFLLWVLAEPANSDFYLPDGLLGGFLSLHANMKGIVHNLFLQVPMCKEYEVKVGIGYN  
LMQAMRFAVEEINNDSSLLPGVLLGYEIVDVCYISNNVQPVLVFLAHEDNLLPIQEDYSNYISRVVAVIG  
PDNSESVMTVANFLSLFLLPQITYSAISDELDRDKVRFALLRTPSADHHVEAMVQLMLHFRWNWIIIVLV

>gi|2370111|emb|CAA70934.1| hereditary hemochromatosis protein isoform 1 precursor [Homo sapiens]  
MGPRARPALLMLLQTAVALQGRLLRSHSLHYLFMGASEQDLGLSLFEALGYVDDQLFVFDHESRRVPEP  
RTPWVSSRISSQMWLQLSOSLKGWDHMFVDFWTIMENHNHSHKESHTLQVILGCEMQEDNSTEGYWKYGY  
DGDQHLEFCPDTLDWRAAEPRAWPTKLEWERHKIRARQNRAYLERDCAQQLQLELGRGVLDQQVPLV

>gi|825628|emb|CAA51272.1| arylsulfatase [Homo sapiens]  
MGPRGAASLPRGPGPRRLLPVVPLPLLLLLLAPPGSAGASRPHLVFLADDLWNVDFHGSRI RTP  
HLDALAAGGVLLDNYTQPLCTPSRSQLLTGRYQIRTGLQHQI IWPCQPSCVPLDEKLLPQLLKEAGYTT  
HMVGKWHLGMRYRCELPFRRGFDYFYGLLGSSEYYSHERCTLIDALNVTRCALDFRDGEEVATGYKNMY

>gi|30583331|gb|AAP35910.1| centromere protein A, 17kDa [Homo sapiens]  
MGPRRRSRKPEAPRRRSPTPTPGPSRRGPSLGASSHQHSRRRQGWLKEIRKLQKSTHLLIRKLPFSRL  
AREICVKFTRGVDFNWQAQALLALQEAABAFVHLFEDAYLLTLHAGRVTLFPKDVQLARRIRGLEEGLG

>gi|30583397|gb|AAP35943.1| coagulation factor II (thrombin) receptor [Homo sapiens]  
MGPRRLLLVAAACFSLCGPLLSARTRARPESKATNATLDPRSFLLRNPNKYEPPWEDEEKNESGLTEYR  
LVSINKSSPLQKQLPAFISDASGYLTSSWLTFLVPSVYTGVEVVSPLNIMAI VVFI LKMKVKKPAVVY  
MLHLATADVLFVSVLPFKISYFSGSDWQFGSELFRVTAAFYCNMYASILLMTVISIDRFLAVVYPMQS

>gi|57208639|emb|CAI41263.1| chromosome 9 open reading frame 68 [Homo sapiens]  
MGPRPLEKGCFFGCFRNSKEERHESRRPLSTSHEPIFFLNTIKMKLKENNLNRLPKGMQARAPSQYSTR  
HFFQDQPAQLNGLNFKISGGSKPP

>gi|29792184|gb|AAH50424.1| FBXO38 protein [Homo sapiens]  
MGPRKKSVKTCIMNNEIPEEMTADETKDYMNQLSHEVLCHI FRYLPLQDIMCECLSRKLKEAVTLYLRV  
VRVVDLCAGRWWEYMPSGFTDASFLTLKMKMPDVEQLYGLHPRYLERRRVRGHEAFSIPGVLEALQACPN  
LVGVETSHLELVESIWTYMPHVHILGKFRNRNGAFPPIPPENKIKIPIGAKIQTLHLVGVNVPEIPICPML

>gi|119625446|gb|EAX05041.1| hCG1778643 [Homo sapiens]  
MGPRATRTGLGPAARERCEERAEGERGDPASAVRPGSRGSGARELGFPPQQTQQRHQGSPAGWAREDV  
VAGSLLRADGRRHGGGSRPAPRRKSPLPAAARAPSPARPRRPHACRDGGGGAGKPGAPRGLGRGMKG  
KFGSGLFRFTGLAARPSVWEHEWPGERGLAARVRTAGRCATLRSPLSLPG

>gi|18490150|gb|AAH22289.1| Calsequestrin 1 (fast-twitch, skeletal muscle) [Homo sapiens]  
MGPRAVPGLRLALLLLVLGTPKSGVQGEGLDFPEYDGVDRVINVNAKNYKRVFKYEVLLALYHEPPE  
DDKASQRQFEMEELILELAAQVLEDKGVGFLVDSEKDAAVAKKLGLETVDSMYVFKGDEVI EYDGEFSA  
DTIVEFLLDVLEDPVELIEGERELQAFENIEDEIKLIGYFKSKDSEHYKAFEDAAEEFHPYIPFFATFDS

>gi|26996524|gb|AAH41095.1| Solute carrier organic anion transporter family, member 2B1 [Homo sapiens]  
MGPRIGPAGEVQPVDKETKATMGENTPFGKASDPDQDVRPSVFNHNIKFLVLCSSLLQLAQIMISGYLK  
SSISTVEKRFGLSSQTSGLLASFNEVGN TALIVFVSYFGSRVHRPRMIGYAILVALAGLLMTLPHFISE  
PYRYDNTSPEDMPQDFKASLCLPTTSAPASAPNSNGNCSSYTETQHLSVVGIMFVAQTLGLVGGVPIQFPF

>gi|16198535|gb|AAH15949.1| Leucine carboxyl methyltransferase 2 [Homo sapiens]  
MGPRSRERRAGAVQNTNDSSALSKRSLAARGYVQDPFAALLVPGAARRAPLIHRGYVVRARAVRHCVRAF  
LEQIGAPQAALRAQILSLGAGFDSL YFRLKTAGRLARAAVVEVDFPDVARRKAE RIGETPELCAITGPF E  
RGEFASALCFESADYCI LGLDLRQLQRVVEALGAAGLDAASPTLLLA EAVLTYLEPE SAAALIAWAAQRF

>gi|21929113|dbj|BAC06141.1| seven transmembrane helix receptor [Homo sapiens]  
MGPRNQTA VSEFLLMKVTE DPELKLIPFSLF LSMYLV TILGNL LILLAVI SDSHLHT PMYFLLFNLSFTD  
ICLTTTTVPKILVNIQAQNSIT YTGCLTQICLV L VFAGLESC FLAVMAYDRYVAICHPLRYTVLMNVHF  
WGLLILLSMFMSTMDALVQSLMVLQLSFCKNVEIPLFFCEVVQVIKLACSDTLINNLIYFASSVFGAIP

>gi|153217501|gb|AAI51221.1| COL4A1 protein [Homo sapiens]  
MGPRLSVWLLLLPAALLLHEEHSRAAAKGGCAGSGCGKCDCHGVKQKGERGLPGLQGVIGFPGMQGPEG  
PQQPPGQK GDTGEPGLPGTKGRPPGASGYPGNPGLPGIPGQDGGPPGPGIPGCNGTKGERGFLGPPGL  
PGFAGNPGPPGLPGMKGDFGEILGHVPGMLLKGGERGFPGIPGTPGPPGLPGLQGPVGGPPGFTGPPGPPG

>gi|75516737|gb|AAI01717.1| DDB1 and CUL4 associated factor 16 [Homo sapiens]  
MGPRNPSPDHLESESEEEEEENISYLNESGGEWDSSEEEEDSMVFNLSPLESLAWQVKLLKYSTTWKPLN  
PNSWLYHAKLLDPSTPVHILREIGLRSLSHCSHCVPKLEPIPEWPPPLASCGVPPFQKPLTSPSRLSRDHAT  
LNGALQFATKQLSRTLRSRATPIPEYLKQIPNSCVSGCCGWLTKTVKETTTRTEPINTTYSYTDQKAVNK

>gi|14249488|ref|NP\_116194.1| zinc finger and SCAN domain-containing protein 10 [Homo sapiens]  
MGPRASLSRLRELCGHWRPALHTKKQILELLVLEQF LSVLP PHLGLR LQGGPLRDGEEVVLLEGIHRE  
PSHAGPLDFSCNAGKSCPRADVTLEEKGCASQVPSHSPKKELPAE EPSVLG PSEPPRPQ PRAAQPAEFG  
QWRLPSSSKQPLSPGPQKTFQALQE SPPQGPSWPEESSRDQELAAVLECLTFEDV PENKAWPAHPLGFG

>gi|51476980|emb|CAH18436.1| piwi-like 4 protein [Homo sapiens]  
MGPRSVDSL NNEASSNGFLGTSRISTNDKYGISSGDAGSTFMERGVKNKQDFMDLSICTREKLAHVRNC  
KMGSSGIFVKLVNNDLDFPQDLGQYQYHVYIPDLASRRRLRIALLYSHSEL SNKAKAFDGA IILFSLQK  
LEEKVTELSSETQRGETIKMTITL KREL PSSSPVCIQVFNIIFRKILKLSMYQIGRNFYNPSEPMEIPQ

>gi|20380192|gb|AAH27978.1| LOC541472 protein [Homo sapiens]  
MGPRSPGALKLLKPTWFRAGRILLTSL LGM SKEDLVASCRVCVYRSLSL

>gi|55962603|emb|CAI17299.1| taste receptor, type 1, member 2 [Homo sapiens]  
MGPRAKTISLFFLLWLVAEPAENSDFYLP GDYLLGGLFSLHANMKGIVHLNLFQVPMCKEYEVK VIGYN  
LMQAMRFAVEEINNDLDFPQDLGQYQYHVYIPDLASRRRLRIALLYSHSEL SNKAKAFDGA IILFSLQK  
PDNSESVMTVANFLSFLFPQITYS AISDELDRDKVRFALLRTPSADHHIEAMVQLMLHFRWNWIIIVLV

**MNKR**

>gi|13625162|gb|AAK34940.1|AF251050\_1 jerky [Homo sapiens]  
MNKRKGYTTLNLEEKMKVLSRIEAGRSLKSVMD EFGISKSTFYDIKKNKKLILDFVLKQDMPLVGA EKRK  
RTTGAKYGDVDDAVYMWYQKRSAGVVPV RGVELQAAAERFARCFGR TDFKASTGWLFRFRNRHAI GNRKG  
CGEQVLSVSENV EPPFRQKLSMI IKEEKLC LAQLYSGDETDLFWKSM PENSQASRKD IC L PGKKINTERL

>gi|15277505|gb|AAH12855.1| Leucine rich repeat containing 51 [Homo sapiens]  
MNKRDMYMTSVQEPFLDYSFRS IHVIQDLVNEE PRTGLRPLKRSKSGKSLTQSLWLNNVNLNDRDFNQV  
ASQLEHPENLAWIDLSFNLDLTSIDPVLT TFFNL SVLYLHGNSIQRLGEV NKLA VLPRLRSLTLHG NPM E  
EEKGYRQYVLC LSRITTFDFSGVT KADR TTA EVWKRMNIKPKKAWTKQNTL

>gi|76779379|gb|AAI05942.1| WNT1 inducible signaling pathway protein 3 [Homo sapiens]  
MNKRRLLYPSGWLHGPSDMQGLL FSTLLLAGLAQFC CRVQGTG PLDTTPEG RPGEVSDAPQRKQFCHWPC  
KCPQQKPRCPGVS LVRDGCCKICAKQPGE ICNEADL CDPHKGLYCDYSVDRPRYETGVCA YLVAVGC  
EFNQVHYHNGQVFPNPLF SCLCVS GAIGCTPLFIPKLAGSHCSGAKGGKSDQSNCSLEPLLQQLSTSY

>gi|3641344|gb|AAC36354.1| signal peptidase complex 18 kDa subunit [Homo sapiens]  
MNKRQLCYQVLNFGMIVSSALMIWKGLM VITGSESP I VVVLSGSM EPAFH RGDLLFL TNRVEDPIRVGEI  
VVFRIEGREIPIVHRVLK IHEKQNGHIKFLTKGD NNAVD DRGLYKQGHWLEKKD VVGRARGFVPIYIGIV  
TILMNDYPKFRYAVLFLGLFVLVHRE

>gi|80478290|gb|AAI09254.1| Chromosome 15 open reading frame 32 [Homo sapiens]  
MNKRRTSVDASKEDLHPADPQSGEGVPPNRKNTKTS PRGEGTAPF SARPCVWTLCEMLSILALVGV LHPF  
YRSNNQVYQK LKTHLRQSSRV DGLMLKPTLLT PSQLKSP EGHLLILPTFNHLVIRHILDPKQIFCVADVC  
TDCKFNCGSIERHQKRHLMRVSDQWEHLIRYRNQICLS

>gi|33874572|gb|AAH15586.2| LAMC1 protein [Homo sapiens]  
MNKRRTSHRIWKNKLP EYMRRPKGPVT KLWRSMPAWLS

>gi|119631655|gb|EAX11250.1| zinc finger protein 650, isoform CRA\_c [Homo sapiens]  
MNKRIEEEICRKVTPPVPPKKTAAEKKTLDEERRQKARERQKLLAEFASRQKSFMETAMDVDSPEND  
IPMEITTAEPQVSEAVYDCVICGQSPSEDRPTGLVLLQASSVLGQCRDNVEPKKLPISSEEQIYPWD  
TCAAVHVDVRLSLQLRYFKDSSCLLAVSIGWEGGVYVQTCGHTLHIDCHKSYMESLRNDQVLQGFVSKGE

**MSSKR**

>gi|48145803|emb|CAG33124.1| MYL9 [Homo sapiens]  
MSSKRAKAKTTTKKRPQRATSNVFMFDQSQIQEFKEAFNMIDQNRDGFIDKEDLHDMLASLGKNPTDEYL  
EGMMSEAPGPIINFMTFMTFGEKLNQTPEDVIRNAFACFDEEASGFIHEDHLRELLTMTGDRFTDEEVD  
EMYREAPIDKKGNFNHYVEFTRILKHGAKDKHD

>gi|21619210|gb|AAH32748.1| Myosin regulatory light chain MRCL3 [Homo sapiens]  
MSSKRTTKTKTKKRPQRATSNVFMFDQSQIQEFKEAFNMIDQNRDGFIDKEDLHDMLASLGKNPTDEYLD  
AMMNEAPGPIINFMTFMTFGEKLNQTPEDVIRNAFACFDEEATGTIQEDYLRRELLTMTGDRFTDEEVD  
LYREAPIDKKGNFNHYIEFTRILKHGAKDKDD

>gi|23096064|dbj|BAC16233.1| L-SOX5 transcript B [Homo sapiens]  
MSSKRPASPYGEADGEVAMVTSRQKVEEESDGLPAFHLPLHVSFPNKPHEEFQPVSLTQETCGHRT  
TSQHNTMEVDGNKVMSSFAPHNSSTSPQKAEEGGRQSGESLSTALGTPERRKGLADVVDTLKQKRMEE  
LIKNEPEETPSIEKLLSKDWKDKLLAMGSGNFGIKGTPESLAEKERQLMGMINQLTSLREQLLAAHDEQ

**MGKK**

>gi|48145649|emb|CAG33047.1| CBX1 [Homo sapiens]  
MGKKQNKKKVEEVELEEEEEYVVEKVLDRRVVKGKVEYLLKWKGFSDENDTWEPEENLDCPDLIAEFLQS  
QKTAHETDKSEGGKRRKADSDSEDKGEESKPKKKKEESEKPRGFARGLEPERIIGATDSSGELMFLMKWKN  
SDEADLVPAKEANVKCPQVVISFYEERLTWHYSPSEDDDKKDDKN

>gi|48146953|emb|CAG33699.1| CBX5 [Homo sapiens]  
MGKKTTRTADSSSEDEEEYVVEKVLDRRVVKGQVEYLLKWKGFSEEHNTWEPEKNLDCPELISEFMKKY  
KKMKEGNNKPREKSESNKRKSNFSNSADDIKSKKREQSNDIARGFERGLEPEKIIGATDSCGDLMLFM  
KWKGTDEADLVLAKEANVKCPQIVIAFYEERLTWHAYPEDAENKEKETAKS

>gi|623240|emb|CAA87632.1| flavin-containing monooxygenase 3 (FMO3) [Homo sapiens]  
MGKKVAIIGAGVSGLASIRSCLEEGLEPTCFEKSNDIGGLWKFSDHAEGRASIKSVFSNSKEMMCFP  
DFPFPDDFPNFMHNSKIQEYIIAFAKKNLLKYIQFKTFVSSVNKHPDFATTGQWDVTTTERDGKKEAVF  
DAVMVCSGHVYPNLPKESFPGLNHFKGKCFHSRDYKEPGVFNKRVLVVGLGNSGCDIATELRSRTAEQV

>gi|7717310|emb|CAB90432.1| human ubiquitin processing protease, EC 3.1.2.15 [Homo sapiens]  
MGKKRTKGTVPIDDSSETLEPVCRHIRKGLQGNLKKALVNVEWNICQDCKTNDNKVKDKAEETEETKPS  
VWLCCLKCGHGCGGRNSQEQHALKHYLTPRSEPHCLVLSLDNWSVWCYVCDNEVQYCSSNQLGQVVDYVRK  
QASITTPKPAEKDNGNIELENKLEKESKNEQEREKKNMAKENPPMNSPCQITVKGSLNLTGTCFFNAV

>gi|28071060|emb|CAD61911.1| SETD3 [Homo sapiens]  
MGKKSrvTKQSGTGATATVSPKEILNLTSELLQKCSSPAPGPKWEVEYVQIRTLEVKIRKQKGLSVT  
FDGKREDYFPDLMKWASENGASVEGFEMVNFKEEGFGLRATRDIKAEELFLWVPRKLLMTVESAKNSVLG  
PLYSQDRILQAMGNIALAFHLLCERASPNFQPYIQITLPSEYDTPLYFEEDVRYLQSTQAIHDFVFSQY

>gi|57997061|emb|CAB66480.2| transient receptor potential cation channel, subfamily  
M, member 3 [Homo sapiens]  
MGKKWRDAAEMERGCSREDNAESRRRSASRGRFAESWKRLLSSKQGSTKRGLPSQQTTPAQKSWIERA  
FYKRECVHIIPSTKDPHRCCGRLIGQHVGLTPSISVLQNEKNESRLSRNDIQSEKWSISKHTQLSPTDA  
FGTIEFQGGGHSNKAMYVRVDFTKPDLHLMTKEWQLELPKLLISVHGGLQNFELQPKLKQVFGKGLI

>gi|55661741|emb|CAH72188.1| Armadillo containing protein 3 [Homo sapiens]  
MGKKIKKEVEPPPDKDVFPLMIESKKAATVVLMLNSPEEEILAKACEAIYKFALKGEENKTTLLELGAVE  
PLTKLLTHEDKIVRRNATMIFGILASNDVKKLLRELDVMNSVIAQLAPEEEVVIHEFASLCLANMSAEY  
PVQLLALKTGLVIANDRESRTMLRDNQGLDHLIKILETKELNDLHIEALAVIANCLEDMDTMVQIQQTG

>gi|12654437|gb|AAH01044.1| Kelch domain containing protein protein 4 [Homo sapiens]  
MGKKGKKEKKGRGAEKTAAMEKVKSKRSRKEETFLYNELYVYNTKRDWTWTKVDIPSPPPRCAHQAVVV  
PQGGGQLWVFGGFEASPNGEQFYHYKDLWVHLATKTWEQVKSSTGGPSGRSGHRMVAWKRQLILFGGFHE  
STRDYIYNDVYAFNLDTFTWSKLSPSGTGTPRSGCQMSVTPQGGIVVYGGYSKQVRVKKDVDKGTRHSD

>gi|62702334|gb|AAH93258.1| eukaryotic translation initiation factor 5B [Homo sapiens]  
MGKKQKNSKEDSTKDDIDLALAAIEGAGAAKEQEPQKSKGKKEKQDFDEDDILKELEELSLEAQ  
GIKADRETVAVKPTENNEEFTSKDKKKKGQKQKQSFDDNDSELEDKSKSKKTAKPKVEMYSGSDDD  
DDFNKLPKAKGKAQKSNKKWDGSEEDNSKIKERSRINSSESGESGDESDEFQSRKGQKKNQKPKGP

>gi|14336712|gb|AAK61244.1| WD repeat domain 24 [Homo sapiens]  
MGKRRRTTSGEGREERQRLPARRFRRTTSPAALRADSVDDGSSLLAPLLGLTDRAFDSDPDLADGAMKMSRVT  
TALGGSVLTGRMTMHCHLDAPANAI SVCRDAAQVVVAGRSIFKIIYAIEEEQFVEKLNLRVGRKPSLNLS  
CA DVVWHQMDENLLATAATNGVVVWNLGRFPRSRKQDQLFTEHKRTVNVKVCFHPTAEHVLLSGSQDGFMKCF

>gi|10433552|dbj|BAB13984.1| Melanophilin [Homo sapiens]  
MGKKLDLTKLTDDEEAQHVLVQVDFDLRRKEERLEALKGKIKKESKRELLSDTAHLNETHCARCLQP  
YQLLVNSKRQCLECGLFCTCKSCGRVHPPEEQGWICDPCHPARVVKIGSLEWYEHVKARFKRFGSAKVI  
RSLHGRQLGGAGPELISEERSGSDSDQTDDEDEPGSEAAQAQAPFGSKKKRLLSVHDFDFEGSDSDSTQPQGH

>gi|10434004|dbj|BAB14093.1| zinc finger protein 93 [Homo sapiens]  
MGKKHYKCEECGKAFIWSVLTTRHKRVHTGEKPYKCEECGKAFKYSSTLSSHRSHTGEKPYKCEECGKA  
FVASSTLSKHEIIHTGKKPYKCEECGKAFNQSSSLTKHKKIHTGEKPYKCEECGKAFNQSSSLTKHKKI  
HSGEKPYECDKCGKAFISPSLSRHEIIHTGEK

>gi|8452874|gb|AAF75126.1| bromodomain-containing protein [Homo sapiens]  
MGKHHKHHKSDKHLIEEYVEKPLKLVKVGNEVTELTGSSGHDSSLFEDKNDHDKHDKRKRKRKRRKGE  
KQIPGEEKGRKRRRVKEDKKKRDRDRVENEAEKDLQCHAPVRLDLPEKPLTSSLAKQEEVEQTPLQEAL  
NQLMRQLQRKDPASFFSFVTFDIAPGYSMIKHPMDFSTMKEKIKNNDYQSI EELKDNFKLMCTNAMII

>gi|23331072|gb|AAH36710.1| FtsJ homolog 3 (E. coli) [Homo sapiens]  
MGKKGKVGKSRDRKDFYHLAKETGYRSRFAFKLIQLNRRFQFLQKARALLDLCAAPGGWLQVAAKFMVSS  
LIVGVDLVFIKPLPNVVTLQEDITTECRQALRKEKLTWKVDVVLNDGAPNVGASVWHDAYSQAHLTLMA  
LRLACDFLARGGSFITKVFRRSRDYQPLLWIFQQFLFRVQATKPKQASRHESAEIFVVCQGF LAPDKVDSKF

>gi|22726243|gb|AAH37404.1| Formin binding protein 4 [Homo sapiens]  
MGKKSRAVPGRRPILQLSPPGPRGSTPGRDPEPEPDTEPDSTAAVPSQFAPSAAATTTAVTAAAASDDSPS  
EDEQEAQVEVPRVQNPFPKVMTRPTAVKATGGCLLGGAYADSDDDNDVSEKLAQSKETNGNQSTDDID  
STLANFLAEIDAITAPQPAAPV GASAPPPTPPRPEPKEAATSTLSSSTSNGTDSTQTSWQYDQCSLAG

>gi|5732187|dbj|BAA83340.1| Heterochromatin protein 1 gamma [Homo sapiens]  
MGKKQNGKSKKVEEAPEEFVVEKVLDRRVVNGKVEYFLKWKGF TDADNTWEPEENLDCPELIEAFLNSQ  
KAGKEKDGTRKRSLSDESDDSKSKKKRDAADKPRGFARGLDPERIIGAIDSSGELMFLMKWKSDEADL  
VLAKEANMKCPQIVIAFYERLTFWHSCPEDEAQ

>gi|11995019|dbj|BAB20038.1| calmodulin-dependent phosphodiesterase [Homo sapiens]  
MGKKINKLFCFNFLVQCFRGKSKPSKCQIRKKVKNHIERLLDTEDELSDIQTDSVPSEVRDWLASTFTRK  
MGMTKKKPEEKPKFRSIVHAV

>gi|2072950|gb|AAC51262.1| p40 [Homo sapiens]  
MGKKQNRKTGNSKTQSASPPPKERSSSPATEQSWMENDFDELREEGFRRSNYSELREDIQTGKEVENFE  
KNLEECITRISNTEKCLKELMELKTKARELREECRSLRSRCDQLEERVSAEMDEMNMKREGKFRKRIK  
RNEQSLQEIWDYVKRPNLRLIGVPESDVENGTKLENTLQDIIQENFPNLARQANVQIQEIQRTPQRYSSR

>gi|16877622|gb|AAH17059.1| Interferon, gamma-inducible protein 16 [Homo sapiens]  
MGKKNIVLLKGLEVIN DYHFRMVKSLLSNDLKLNLKMR EYDKIQIADLMEEKFRGDAGLGKLIKIFE  
DIPTLEDLAETLKEKLVKGPALSRKRKKEVDATSPAPSTSTVTKTEGAEATPGAQRKSKSTKEKAGPK  
GSKVSEEQTPPSFAGAGMSTAMGRSPSPKTSLSAPPNTSSTENPKTVAKCQVTPRRNVLQKRPVIVKVL

>gi|14189956|gb|AAK55519.1|AF305816\_1 PRO0633 [Homo sapiens]  
MGKKIASVNIKEARDIMLYLQRAINTAMYHIMMFQVLKDHIRGWSEQQAI PYS LGV

**MNK**

>gi|30268228|emb|CAD89903.1| ATP-binding cassette, sub-family A (ABC1), member 10 [Homo sapiens]  
MNKMALASFMKGRVIGTFDEETMDIELPKKYHEMVGVI FSDTFSYRLKFNWGYRIPVIKEHSEYTEHCW  
AMHGEIFCYLAKYWLKGFVAFQAANAAIEVTTNHSVMEELTSVIGINMKIPPFISKGEIMNEWFHFTY  
LVSFSSFIYFASLNVAAREGGKFKKLMVTMGLRESAFWLSWGLTYICSI FIMSIFMALVITSISIVFHTGF

>gi|47496573|emb|CAG29309.1| APCS [Homo sapiens]  
MNKPLLWISVLTSLLEAFAHTDLSGKVFVFPRESVTDHVNLITPLEKPLQNF TLCFRAYS DLSRAYS LFS  
YNTQGRDNELLVYKERVGEYSLYIGRHKVT SKVIEKFPAPVHICVSWESSGIAEFWINGTPLVKKGLRQ  
GYFVEAQPKIVLQEQDSYGGKFD RSQSFVGEIGDLYMWDVLPENILSAYQGTPLPANILDWQALNIE

>gi|36454|emb|CAA48251.1| SHC transforming protein [Homo sapiens]  
MNKLSGGGRTRVREGGQLGGEWTRHGSFVNKPTRGWLHPNDKVMGPGVSYLVRYMGCVEVLQSMRALD  
FNTRTQVTREAI SLVCEAVPGAKGATRRRKP CSRPLSSILGRSNLKFAGMPITLTVSTSSLNMAADCKQ  
IIANHHMQSISFASGGDPDAEYVAVYAKDPVNQRACHILECEGLAQDVISTIGQAFELRFKQYLRNFP

>gi|1419564|emb|CAA67203.1| cytokeratin [Homo sapiens]  
MNKVELESRLLEGLTDEINFLRQLYEEELRELQSQISDTSVVLSDMNSRSLDMSIIAEVKAQYEDIANRS  
RAEAESMYQIKYEEELQSLAGKHGDDLRRTKTEISEMNRNISRQAIEGLKGRASLEAAIADAEQRGEL  
AIKDANAKLSELEAALQRAKQDMARQLREYQELMNVKLMADIEIATYRKLLEGEESRLESQMNMSTHTK

>gi|2980861|emb|CAA04923.1| NKG2E [Homo sapiens]  
MNKQRGTFSEVSLAQDPKPKQRKPKGNKSSISGTEQEIFQVELNLQNASLNHQGIDKIYDCQGLLPPPEK  
LTAEVLGIIICIVLMATVLKTIIVLIPFLEQNNSSPNTRTQKARPCGHCPEEWITYSNSCYIIGKERRTWE  
SLQACASKNSSLISIDNEEMKFLASILPSSWIGVFRNSSHHPWVTINGLAFKHEIKDSDHAERNCAML  
HVRGLISDQCGSSRIIRRGFIMLTRLVLNS

>gi|2980863|emb|CAA04924.1| NKG2F [Homo sapiens]  
MNKQRGTYSEVSLAQDPKPKQRKPKGNKSSISGTEQEIFQVELNLQNASSDHQNDKTYHCKGLLPPPEK  
LTAEVLGIIICIVLMATVLKTIIVLIPFLEQNNSSPNTRTQKARPCGHCPEEWITYSNSCYIIGKERRT  
WEERVCWPVLRRTLICFL

>gi|32968195|emb|CAE12157.1| bubblegum related protein [Homo sapiens]  
MNKTEVTPRLWTTCDRGEVLLRLSKHGGPHETPMTIPEFFRESVNRFGTYPALASKNGKKWEILNFNQYY  
EACRKAASLIKGLERFHGVGILGFNSAEWFITAVGAILAGGLCVGIYATNSAEACQYVITHAKVNILL  
VENDQQQLQKILSIPQSSLEPLKAI IQYRLPMKNNNLYSWDDFMELGRSIPDTQLEQVIESQKANQCAVL

>gi|30583437|gb|AAP35963.1| PCTAIRE-motif protein kinase 3 [Homo sapiens]  
MNKMKNFKRRFSLVPRTEETIEESLAEFTEQFNQLHNRNENLQLGLGRDPPQECSTFSPTDSGEEPGQ  
LSPGVQFQRRQNRFSMEDVSKRLSLPMDIRLPQEFQKQLQMESPDLPKPLSRMSRRASLSDIGFGKLE  
TYVKLDKLGEGTYATVFKGRSKLMENLVALKEIRLEHEEGAPCTAIREVSLKLNKLANIVTLHDLIHTD

>gi|28071042|emb|CAD61902.1| FERM domain containing 6 [Homo sapiens]  
MNKLNFNHNRVMQDRRSVCIFLPNDESNIINVKILCHQLLVQVCDLLRLKDCFLGSLVIQNEHVYM  
ELSQKLYKYCPKEWKEASKGIDQFGPPMIHFRVQYYVENGRLISDRAARYYYWHLRKQVLHSQCCLR  
EEAYFLLAAAFALQADLGNFKRNKHYGKYFEPEAYFPSPWVSKRGKDYILKHI PNMHKQDFALTASEAHLK

>gi|28071114|emb|CAD61938.1| DDB1 and CUL4 associated factor 4 [Homo sapiens]  
MNKSRWQSRRRHGRSHQONPWFRLRDSEDRSDSRAAQAHDSDGHGDDSPSTSSGTAGTSSVPELPGFY  
FDEPKRYFRLLPGHNNCNPLTKESIRQKEMESKRLRLQEEEDRRKKADTNSDRLFTVNDVKVGGSKYGI  
INLQSLKTPTLKVFHMENLYFTNRKAPLLFNGCRSGEIFAIDLRCGNQKGGWKATRLFHDSAVTSVRILQ

>gi|28193240|emb|CAD62362.1| NUMB protein [Homo sapiens]  
MNKLRQSFRRKKDVYVPEASRPHQWQTDDEEGVRTGKCSFPVKYLGHVEVDES RGMHICEDAVKRLKAERK  
FFKGFFGKTGKAVKAVLWVSADGLRVVDEKTKDLIVDQTIKVSFCAPDRNFDRAFSYICRDGTTRRWI  
CHCFMAVKDTGERLSHAVGCAFAACLERKQKREKECGVTATFDASRTTFTREGSFRVTTATEQAEREEM

>gi|57997536|emb|CAI46013.1| eukaryotic translation initiation factor 4 gamma 1 isoform 5 [Homo sapiens]  
MNKAPQSTGPPAPSPGLPQPAFPFGQTAPVVVFSTPQATQMNTSPQPRQHFYPSRAQPSSAASRVQSAA  
PARPGPAAHVYPAGSQVMMIPSQISYPASQGAYYIPGQGRSTYVVPTQQYPVQFGAPGFYPGASPTEFGT  
YAGAYYPAQGVQFPTGVAPAPVLMNQPPQIAPKRERKTIRIRDPNQGGKDI TEEIMSGARTASTPTPPQ

>gi|55957377|emb|CAI12322.1| zinc finger protein 248 [Homo sapiens]  
MNKSQEQVSFKDVCVDFTEQEEWYLLDPAQKILYRDVILENYSNLVSVGYCITKPEVIFKIEQGEEPWILE  
KGFPSQCHPERKWVDDVLESSQENEDDHFWEELFHNNKTVSVENGDRGSKTFNLGTDVPSLRNYPYKIC  
DCEMNLKNISGLIISKNCNRKPKDEFNVCEKLLDIRHEKIPIGEKSYYDQKRNAINYHQDLSQPSF

>gi|56417830|emb|CAI20323.1| TTK protein kinase [Homo sapiens]  
MNKVRDIKKNFKNEDLTDELSLNKISADTTDNGSTVNQIMMANNPEDWLSLLKLEKNSVPLSDALLNK  
LIGRYSQAIEALPPDKYQNESFARIQVRFELKAIQEPDDARDYFQMARANCKKFAFVHISFAQFELSQ  
GNVKKSKQLLQKAVERGAVPLEMLEIALRNLNLQKQLLSEEEKKNLSASTVLTQESFSGSLGHLQNRN  
NSCDSRGQTTKARFLYG

>gi|56202720|emb|CAI23623.1| zinc finger protein 33B [Homo sapiens]  
MNKVDQKFGQSVSFKDVTGFTQBEWQHLDPSQRALYRDVMLENYSNLVSVGYCAHKPEVIFRLEQGE  
WRLEEEFSPQSFPFVWTAHDLKERSQENQSKHLWEVVFINNEMLTKEQGNVIGIPFNMDVSSFP SRKMFC  
QYDSRGMSTNTVSELVISKINYLGKKSDEFNACGKLLLNKIHDETHTREKNEVLKRNRTLSHRENTLQHE

>gi|123242365|emb|CAM16212.1| inversin [Homo sapiens]  
MNKSENLLFAGSSLASQVHAAAVNGDKGALQRLIVGNSALKDKEDQFGRTPLMYCVLADRLDCADALLKA  
GADVNTDHSQRTALHLAAQKGNRYFMKLLLRRANWQKDL EEMTPHLTLTRHRSPKCLALLLKFMAPG  
EVDTDKNKQATALHWSAYYNNPEHVKLLIKHDSNIGIPDVEGKIPLHWAANHKDPSAVHTVRCILDAAPT

>gi|55661407|emb|CAH72821.1| biogenesis of lysosomal organelles complex-1, subunit 2 [Homo sapiens]  
MNKLTSLKYLEMKDIAINISRNLDLNQKYAGLQPYLDQINVIEEQVAALEQAAYKLDAYSKKLEAKYKK  
LEKR

>gi|55957576|emb|CAI16451.1| cancer antigen 1 [Homo sapiens]  
MNKDYQKFWSSPDPVHFVDTSEHEKVESMSESDTMNVSNLSQGVMLSHSPICMETTGTTCDLFPQNEIKN  
FERENEYESTLCEADYGTLDNLDNNDNIENYSTNALIQPVDTISISSLRQFETVCKFHWEAFDDEMTEK  
PEFQSQVYNYAKDNNIKQDSFKENPMETSVSANTDQLGNEYFRQPPRSPPLIHCSGEMLKFTKSLAK

>gi|55662764|emb|CAH69953.1| zinc finger protein 33A [Homo sapiens]  
MNKVEQKQESVSKDVTGFTQEEWQHLDPSQRALYRDVMLENYSNLVSVGYCVHKPEVIFRLQGGEEP  
WKQEEEFPSQSPFVWTADHLKERSQENQSKHLWEVVFINNEMLTKEQGDVIGIPFNVDVSSPFRKMFQ  
CDSCGMSFNTVSELVISKINYLKGSKDEFNACGKLLLNKHDHTHTQEKNEVLKNNRNTLSHHEETLQHEK

>gi|55660902|emb|CAH73314.1| zinc finger protein 25 [Homo sapiens]  
MNKFGQPVTLKDVIVVEFTKEEWKLLTPAQRTLYKDVMLENYSHLVSVGYHVNKPNVAVFKLKQKPEWILE  
VEFPHRGFPEDLWSIHDLLEARYQESQAGNSRNGELTKHQKTHTEKACECKEKGKFFCQKKSALIVHQHTH  
SKGKSYDCDKCGKSFKNEDLIRHQKIHTRDKTYECKECKKIFYHLSLSRHLRTHAGEKPYECNQCEKS

>gi|56203967|emb|CAI21906.1| PRP6 pre-mRNA processing factor 6 homolog (S. cerevisiae) [Homo sapiens]  
MNKKKKPFGLMPAPLGYVPLGRGATGFTTRSDIGPARDANDPVDDRHPGKRTVGDQMKKNQAADDDD  
EDLNDTNYDEFNGYAGSLFSSGPEYKDDDEEADAIYAALDKRMDERRKERREQREKEEIEKYRMRPKIQ  
QFSDLKRKLAEVTEEEWLSIPEVGDARNKRQRNPRYEKLTVPVDSFFAKHLQGTGENHTSVDPRTQFGGL

>gi|21262188|gb|AAM44457.1|AF273054\_1 CTCL tumor antigen HD-CL-01 [Homo sapiens]  
MNKGEHALVLFKFCVQDKYLQOEHI IKKLIKENKKHQELFVDICSEKDNLREELKKRTEKQHMNTIKQ  
LESRIEELNKEVKASRDKLIADQVTAKNVAVQLLHKEMAQRMEQANKKCEARQEKEAMVMKYVRGEKESL  
DLRKEKETLEKLRDANKLEKNTNKKQLSQEKGRHLQLYETKEGETRRLIREIDKLKEDINSHVIVKVK

>gi|34979789|gb|AAQ83883.1| urotensin IIB precursor [Homo sapiens]  
MNKILSSTVCFGLLTLLSVLIFLQSVHGRPYLTQGNEIFPDKKYTNREELLLALLNKNFDFQRPFNTDLA  
LPNKLEELNQLKLEQLVEEKDSETSAYVDGLFSSHPKRACFWKYCV

>gi|37727959|gb|AAR02358.1| interleukin-1 receptor-associated kinase 4 [Homo sapiens]  
MNKPIPTSTYVRCNLVGLIRKLSDFIDPQEGWKKLAVAIKKPSGDDRYNQFHIRRFEALLQTGKSPTSEL  
LFDWGTNCTVGLDVLDDLIQNEFFAPASLLLPDAVPKTANTLPSKEAITVQQKQMPFCDKDRTLMTVPQN  
LEQSYMPPDSSSPENKSLEVSDFRHSFSFYELKKNVTNNFDERPISVGGNKMGEFGVYKGYVNNNTV

>gi|32186842|gb|AAP73047.1| pyridoxal kinase [Homo sapiens]  
MNKYDYVLTGYTRDKSFLAMVVDIVQELKQNPRLVYVCDPVLGDKWDGEGSMYVPEDDLVPVYKEKVPL  
ADIITPNQFEAELLSGRKIHQSQEALRVMMLHSMGPDVTVITSSDLSPQGSNYLIVLGSQRRRNPA  
GSMERIRMDIRKVDVAVFVGTGDLFAAMLLAWTHKHPNNLKVACEKTVSTLHHVLQRTIQCAKAQAGEGVR

>gi|14042807|dbj|BAB55401.1| basic leucine zipper and W2 domains 2 [Homo sapiens]  
MNKHQKPVLTGQRFKTRKRDEKEKFEPTVFRDRTLQVQGLNEAGDDLEAVAKFLDSTGSRDLRYRYADTLFD  
ILVAGSMILAPGGTRIDDDGKTKMTHNCVFSANEDHETIRNYAQVFNKLIIRRYKYLEKAFEDKMKLLFL  
KAFSETEQTKLMLSGILLGNGTLPATILTSLSLFTDSLVEKNEAPVFSVVRQKKNKVTDS

>gi|10439180|dbj|BAB15455.1| GTPase, IMAP family member 6 [Homo sapiens]  
MNKFPRRIPQKSCPRILWCSCQEVSPVADAIQCAIVLSAPGPHAVLLVTQLGRFTDEDQVVRRLQEVF  
GVLGHTILVFRKEDLAGSSLEDYVRETNNQALAWLDVTLARRHCGFNNRAQGEQEAQLRELMEKVE  
AIMWENEGDYYSNKAYQYVQNFRLKELQERQVSQGGSEDVPEESWLEGLSQIQKESSEEAHRCLLGA

>gi|71297488|gb|AAH47475.1| C5orf44 protein [Homo sapiens]  
MNKIYSYSDSSSERTMDLVLEMCNTNSIHWCGISGRQLGKLPSSSLCLALTLSSVQGLQGISGLRL  
TDTFLKRTYDYDDIAQVCVVSSAIKVES

>gi|12804391|gb|AAH01596.1| BRCA1 associated protein-1 (ubiquitin carboxy-terminal hydrolase) [Homo sapiens]  
MNKGWLELESDPGLFTLLVEDFGVKGQVEEIIDLQSKCQGPVYGFIFLFWKIEERRSRKRVSTLVDDTS  
VIDDDIVNNMFFAHLQIPNSCATHALLSVLLNCSSVDLGPPLSRMKDFTKGFSPEKGYAIGNAPELAKA  
HNSHARPEPRHLPEKQNGLSAVRTMEAFHFVSYPITGRLFELDGLKVYPIDHGPWGEDEEWTDKARRVI

>gi|49901612|gb|AAH74910.1| Zinc finger protein 645 [Homo sapiens]  
MNKMPAGQECEYNEKGLYYSKGVKLVKRRKKKIPGYRWGDIKINIIGEKDDLPIHFCDKCDLPIKIYGR  
IPCKHAFICYHCANLYDKVGYKVCPRCRYVPLRIEAKHRGVSVMCSIVQCKRRTYLSQKSLQAHIKRRHKR  
ARRQVTSASLEKVRPHIAPPQTEISEIPKRLQDRDHLYSIIPPEQHTMVSLSVQHMLQEQHNPBKDIQA

>gi|12751083|gb|AAK07536.1|AF277176\_1 PNAS-118 [Homo sapiens]  
MNKHGICVVDLFGKETQQIGDEVRLHDTGKFTDGSWSARVTRPRTSEAIRSPGSRARSAPAAKPLGCS

>gi|6467204|dbj|BAA86989.1| gonadotropin inducible transcription repressor-3 [Homo sapiens]  
MNKSLGPPVSKFDVAVDFTEQEWQQLDPEQKITYRDVMLENYSNLVSVGYHIIKPDVSKLEQGEPEWIVE  
GEFLLQSYDPDEVWQTDLLIERIQEENKPSRQTVFIEITLIEERGNVPGKTFDVTETNPVPSRKIAYKNSLC  
DSCEKCLTSVSEYISSDGSYARMKADECSGCGKSLHLKLEKTHPGDQAYEFNQNGEPEYTLNEESLYQKI

>gi|76828045|gb|AAI07132.1| DKFZp7790175 protein [Homo sapiens]  
MNKEYGKSFSGSLVTRHQRIHTGKKPYECKEKGAFSCSSYFSQHQRHTGKPYECKEKGAFKYCSN  
LNDHQRIHTGKPYECKVCGKAFTKSSQLFHLRIHTGKPYECKEKGKAFQHSRLIQHQRMHTGKPY  
ECKQCGKAFNSASTLTNHHRIHAGEKLYECECRKAFIQSSELIHQHRIHTDEKPYECNECGKAFNKGSN

>gi|4580924|gb|AAD24541.1|AF114165\_1 endothelin receptor B delta 3 [Homo sapiens]  
MNKSTCLMAAETPSKRWRHLCLAFSQRFVRAGPACSSREACSSPRAGWNPAGFRLPGRWSPFVALHLVCQ  
IREALKLRPPDASGAGSSMQPPPSLCGRALVALVLACGLSRIWGEERGFPDRATPLLQTAEIMTPPTK  
TLWPKGSNASLARSLAPAEVPGKDRTAGSPPTISPPPCQGPPIEIKETFKYINTVVSCLVFLVGLIIGNST

>gi|7141072|gb|AAF37203.1|AF198254\_1 mRNA-binding protein CRDBP [Homo sapiens]  
MNKLYIGNLNSVTPADLEKVF AEHKISYSQGFLVKSQYAFVDCPDEHWAMKAIETFSQKVELQGRLEI  
EHSVPKQSRKIQIRNIPPQLRWEVLDLSLLAQYGTVENCEQVNTSEAVVNVTYSNREQTRQAIMKLN  
GHQLENHALKVSYPDEQIAQGPENRRGGFGSRGQPRQGSVAAGAPAKQQQVDIPLRLLVPTQYVGAI

>gi|9896486|gb|AAG00606.2|AF292100\_1 RP42 protein [Homo sapiens]  
MNKLNKSSQKDKVRQFMIFQSSSEKTAVSCLSQNDWKLVDATDNFFQNPELYIRESVKGSLDRKKLEQLYN  
RYKDPQDENKIGIDGIQQFCDDLALDPASISVLIIAWKFRATQCEFSKQEFMDGMTELGCDSEIQLKAQ  
IPKMEQELKEPGRFKDFYQFTFNFAKNPGQKGLDLEMAIAYWNLVNLNFRKFLDLWNKFLLEHHKRSIPK

>gi|115527975|gb|AAI25117.1| STXB4 protein [Homo sapiens]  
MNKNTSTVSPSLEKDPAFQMITIAKETGLGLKVLGGINRNEGPLYIQEIIPGGDCYKDGRLKPGDQL  
VSNKESMIGVSEEEAKSIITRAKLRLESWEIAFIRQKSDNIQPENLSTSLIEASGEYGPQASTLSLF  
SSPPEILIPKTSSTPKTNDILSSCEIKTGYNKTVQIPITSENSTVGLSNTDVASAWTENYGLQEKISLN

>gi|80478856|gb|AAI09033.1| MAP3K6 protein [Homo sapiens]  
MNKVLPAKLEVRGTDVSTVLSLLEPETQDIPSSWTFPVASICGVSASKRDERCCFLYALPPAQDVQL  
CFPSVGHQCQWFCGLIQAVVTNPDPSTAPAEAEAGAGEMLEFDYEYTTETGERLVLGKGTYGVVYAGRDRHTR  
VRIAIKEIPERDSRFSQPLHEEIALHRRLRHKNIVRYLGSASQGGYLKIFMEEVPGGSLSSLLRSVWGFL

>gi|116283774|gb|AAH29887.1| MIST protein [Homo sapiens]  
MNKPLLDWERNFAAVLDGAKGHSDDDDYDPELRMEETWQSIKILPARPIKESYADTHYFKVAMDTPLPL  
DTRTSISIGQPTWNTQTRLERVDKPIKSDVRSQNIKGDASVRKNKIPLPPRPLITLPPKYQPLPPEPES  
SRPPLSQRHTFPEVQRMPSQISLRDLSEP

>gi|118341527|gb|AAI27709.1| Low density lipoprotein receptor class A domain containing 1 [Homo sapiens]  
MNKVFPQGENGYTAAESKAHPGGEAGGGHLCCSRRGACLSASLLLLLATVAALIALVTLGLPSTPGAQ  
ACITLNTRTGFLCHDQRSCIPASGVCDGVRTCTHGEDEDESLCRDVPQSLPHFLVAHCGDPASWIYSDQK  
CDGTNCCGDCSDELSPVTVCPCCGPGWWRCPSTFFKYCDCIPRHLCDRHVQHCSDWSEYACPGP

>gi|15011984|gb|AAC16603.2| bystin [Homo sapiens]  
MNKNPPARRTLADIIMEKLEKQTEVETVMSEVSGFPMQLDPRVLEVYRQVREVLSKYRSGKLPKAFKI  
IPALSNWEQILYVTEPEAWTAAAMYQATRIIFASNLKERMAQRFYNLVLPRVDDVGEYKRLNFHLYMAL  
KKALFKPGAWFKGILIPLCESGTCTLREAIIVGSIITKCSIPVLHSSAAMLKIAEMEYSGANSIFLRLLL

>gi|11493552|gb|AAG35549.1|AF132207\_7 PRO1933 [Homo sapiens]  
MNKHNLRLVQLASELILIEIIPKLFSLQVTTISHIKREKIPPNHRKGI LCMFPWQCVVYVFSNFVWLVIH  
RFSNGFIQFLGEPYRLMTASGTHGRIFMVDIPIIKNTQVLRIPVLKDPKMLSKKH

>gi|71296834|gb|AAH40543.1| PTPRM protein [Homo sapiens]  
MNKLDPQTNSSQIKKEEFTLNMVTPTLRVEDCSIALPRNHEKNR CMDILPPDRCLPFLITIDGESSNYI  
NAALMDSYKQPSAFIVTQHPLNPTVKDFWRLVLDYHCTSVVMLNDVDPALCQYWPENGVHRHGPIQVE  
FVSADLEEDIISRIFRIYNAARQDGYRMVQQFQFLGWPMYRDTPVSKRSFLKLRQVQDKWQEEYNGGEG

>gi|32879957|gb|AAP88809.1| numb homolog (Drosophila)-like [Homo sapiens]  
MNKLRQSLRRRKPAYVPEASRPHQWADEDAVRKGTCSFPVRYLGHVEVEESRGMHVCEDAVKKLLKAMGR  
KSVKSVLWVSADGLRVVDKTKDLLVDQTIKVSFCAPDRNLDAFYSICRDGTTRRWICHCFALKDSG  
ERLSHAVGCAFAACLERKQREKECGVTAADFASRTSFAREGSFRLSGGGPAEREAPDKKAEAAAAFT



>gi|31418053|gb|AAH12584.1| CCT8 protein [Homo sapiens]  
MNKMVINHLEKLFVTNDAATILRELEVQHAAKMIVMASHMQEQEVGDGTNFVVLVVFAGALLELAEELLRI  
GLSVSEVIEGYEIACRKAHEILPNLVCCSAKNLRDIDEVSSLRRTSISMSKQYGENEVFLAKLIAQACVSIF  
PDSGHFNVDNIRVCKILGSGISSSSVLHGMVFKKETEEDVTSVKDAKIAVYSCPFDDGMITETKGTVLIKT

>gi|57336877|emb|CAH61082.1| CLLU10S protein [Homo sapiens]  
MNKLGHNELKECLKTATDSLQTVQPSSIQTCTSYGPALGAPLGRNEVALLTSLPPNVEISEGKPRATSA  
YVRAGKGNVTRRRKTHLGNDDGKKEAQEKM

>gi|7019824|dbj|BAA90885.1| RNA-binding region (RNP1, RRM) containing 3 [Homo sapiens]  
MNKLMELANLQPKRPKTIKQRHVRKKRIKMDLNTPLCPSHSSLHPVLLPSDVFDQPPVGNKRIEFHIS  
TDMFAAFKKDLKEQNCCEKNHDLPADEVNASNIGFGKIFPKPNLDITEIKEDSDEMPSECISRKEKKK

>gi|34526680|dbj|BAC85263.1| CCR4-NOT transcription complex, subunit 2 [Homo sapiens]  
MNKNTFNLFIYLLSAYCVIGNFNFALYHISIFPIHLPYMGTLPPCCTPPSKCAHAHAHTFVYESQL  
QVEVLRASASLVPQLYLSGHLQEALSLSPFVCNRSEFKHSRYNLHLSIMKRQVIS

**MNR**

>gi|34365487|emb|CAE46067.1| C9orf61 protein [Homo sapiens]  
MNRMMVGGPDVPIPLPHIYGARIKVEVFCLDPPEPYEAVVSQMDQEQSSSFQMSSEGSEAAVPLDLGCTQ  
VTQGDGIPNIPAEENASTSTPSSLVLRPISRRLPLLRTRSKSDPVLHPSEERGDVLPQALRRAVCLFA

>gi|49456571|emb|CAG46606.1| PDGFB [Homo sapiens]  
MNRWCALFLSLCCYLRLVSAEGDPIPEELYEMLSDHISRSFDDLQRLHLGDPGEEDGAELDLNMTRSHSG  
GELES LARGRRSLGLSLTAEAPAMIAECKTRTEVFEISRRLIDRTNANFLVWPPCDEVQRCSCGCCNRRNVQ  
CRPTQVQLRPVQVRKIEIVRKKPIFKKATVTLLEDHLACKCETVAAARPVTRSPGGSQEQRAKTPQTRVTI

>gi|47496633|emb|CAG29339.1| GLRA2 [Homo sapiens]  
MNRQLVNIILTALFAFFLETNHFRFAFKDHDSDRSGKQPSQTLSPSDFLDKLMGRTSGYDARIRPNFKGPP  
VNVTCNIFINSFGSIAETMDYRVNIFLRQQWNSRLAYSEYPDDSLDLDPSMLDSIWKPDLLFFANEGA  
NFHDVTTDNKLLRISKNGKVLYSIRLTLTLSCPMDLKNFPMQVDTCTMQLSEFGYTMNDLIFEWLSDGFPV

>gi|48145653|emb|CAG33049.1| Peci [Homo sapiens]  
MNR TAMRASQKDFENSINQVKLLKDPGNEVKKLYALYKQATEGPCNMPKPGVFDLINKAKWDAWNALG  
SLPKAARQNYVDLVSSLSPLSESSQVEPGTDRKSTGFETLVVTSEDGITKIMFNRPKKKNAINTEMYH  
EIMRALKAASKDSDIITVLTGNVDYSSGNDLITNFTDIPPGVVEEKAKNNAVLLREFVGCIFIDFKPLIA

>gi|48146705|emb|CAG33575.1| C14orf133 [Homo sapiens]  
MNR TKGDEEYWNSSKFAFTFDEDELSQLKESKRAVNSLDRFVDDDDDDLERVSWSGEPVSGSISWS  
IRETAGNSGSTEHEGREQLKSRNSFSSYAQLPKPTSTYLSLSSFFRGRTRPGSFQSLSDALS DTPAKSYAPE  
LGRPKGEYRDYSDNWSPSDTVRRLRKGKVC SLERFRSLQDKLQLEEA VSMHDGNVITAVLIFLKR TLSK

>gi|49065430|emb|CAG38533.1| DKFZp761B1514 [Homo sapiens]  
MNRFGTRLVGATATSSPPKARSNENLDKIDMSLDDI IKNRKEGKKQNFPRLNRRLLQQSGAQQFRMRV  
RWGIQQNSGFGKTSLNHRGRVMPGKRRPNGVITGLAARKTTGIRKGISPMNRPPLSDKNIEQYFPVLRK  
ANLLRQNEGQRKPVAVLRKPSQLSRKNNIPANFTRSGNKLNHQKDRQATFLFRRLGLKVQAQLNTEQLLD

>gi|30172452|gb|AA017041.1| E2F-associated phosphoprotein [Homo sapiens]  
MNR LPDDYDPYAVEEPSDEEPALSSSEDEVDVLLHGTDPQKRKLIRECLTGESESSSEDEFEKEMEAE LN  
STMKTMDKLSLGTGSSGNGKVATAAPTRYDDIYFDSSEDEEDRAVQVTKKKKKKQHKIPTNDEL LYD  
PEKDNRDQAWVDAQRRGYHGLGPQRSRQQQPVNSDAGLELSCLHDHTLALIAKGMNHTKTQYRAMFVMN

>gi|8249458|emb|CAB93146.1| NF-KB Essential Modulator [Homo sapiens]  
MNRHLWKSQLECMVQPSGGPAADQDVLGEE SPLGK PAMLHLPSEQ GAPETLQRCLEENQE LRDAIRQSNQ  
ILRERCELLHFQASQREEKFLMCKFQEARKLVERLGLKLDLKRQKEQALREVEHLKRCQQQMAEDKA  
SVKAQVTSLLGELQESQSRLEAATKECQALEGRARAASEQARQLESEREALQQQHSVQVDQLRMQGQSVE

>gi|3947700|emb|CAA60883.1| CD4 [Homo sapiens]  
MNRGVPPFRHLLVLQLALLPAATQGGKVVGLKKGDTVELTCTASQKKSIFHWKNSNQIKILNGQGSFLT  
K

>gi|31074629|emb|CAD91891.1| keratin 2p [Homo sapiens]  
MNRQVCKSFSGSRSGGFSRVS AVVSGSRMCSVARSGAGGGACGFRSGAGSFGSRSLYNLGSNKSSISIS  
VAAGSSRAGGFGGGRSSCGFAGGYGGGFGGSYGGGFGGGRGVGSGFGGAGGFGGAGGFGGPGVFGGPGSF  
GGPGGFGGPGGPGGIQEVIVNQSLQLNVEIDPQIGVKAQEREQIKTLNKKFASFIDKVRVLEQQNKV

>gi|12052963|emb|CAB66656.1| Kv channel interacting protein 2 [Homo sapiens]  
MNRCPRRRCRSPGLQAARSLYQLVGTGSLSPDSDVDFEFESSTVCHRPEGLEQLQEQTQKTRKELQVLYRGFK  
NECPFGIVNEENEFKYISQFFPQGDSSYATFLFNADFTNHDGVSFEDFVAGLSVILRGTVDDRLNWF  
NLYDLNKGDCITKEEMLDIMKSIYDMMGKYTYPALREEAPREHVESFFQKMDRNDKGVVTTNEEFIESCQK

>gi|57997498|emb|CAI46079.1| hypothetical protein [Homo sapiens]  
MNRKWEAKLKQIEERASHYERKPLSSVYRPRLSKPEEPPSIWRLFHRQAQAFNFVKCKEDVHVFALECK  
VGDGQRIYLVTTYAEFWFYKSRKNLLHCYEVI PENAVCKLYFDLEFNK PANPGADGKMMVALLIEYVCK  
ALQELYGVNCSAEDVNLNDSSTDEKFSRHLIFQLHDVAFKDNHVGNFRLRKILQPALDLDLGSSEDDSAFE  
>gi|55957435|emb|CAI12404.1| chromosome 9 open reading frame 29 [Homo sapiens]  
MNRNILEEMLQYLLIDWIVGDQFEIQLNQQLWSLIPNNDVRRVLSHVIRTLLKTDCTETHLQLACAKLISR  
TGLLMKLLSEQQELRTVSMTAWKPRMNRKRSRMSIPSGPDMEEETDVS

>gi|56202659|emb|CAI20261.1| RP1-132F22.1 [Homo sapiens]  
MNRYYTTRQLGDTYGSVLLGRSIESGELIAIKMKRKFYSWEECMNLREVKSLKLNHANVVKLEKIVR  
ENDHLYFIFEYMKENLYQLIKERNLFPESAIRNIMYQILQGLAFIHKHGFHRDLKPENLLCMGPPELVK  
IADFLGLAREIRSKPPYTDYVSTRWYRAPEVLLRSTNYSSPIDVWAVGCIMAEVYTLRPLFPGASEIDTIF

>gi|14787753|emb|CAB44747.3| par-6 partitioning defective 6 homolog beta (C. elegans) [Homo sapiens]  
MNRSHRHGAGSGCLGTMEVSKKFGAEFRFSLERSKPKGFEEFYGLLQHVHKIPNVVDVLVGYADIHGDL  
PINNDNHYKAVSTANPLLRIFIQKKEADYSAFGTDTLIKKNVLTNVLRPNDRKPHIVISMPQDFR  
PVSSIIDVDILPETHRRVRLKYGTEKPLGFYIRDGSSVRVTPHGLEKVPGFISRLVPGGLAQSTGLLA

>gi|55663294|emb|CAH70841.1| regulator of G-protein signalling 3 [Homo sapiens]  
MNRFNGLCKVCSEERRYRQITIPRKGKDFGFTICCDSPVRVQAVDSGGPAERAGLQQLDVTVLQNLNERPVEH  
WKCVELAHEIRSCPSEIILLVWRMVPQVKPGDGGVLRASCKSTHDLQSPPNKREKNCTHGVQARPEQR  
HSCHLVCDSSDGLLLGWERYTEVAKRGGQHTLPALSRATAPDTPNYIILAPLNPQSLLRPVYQEDTIP

>gi|14714723|gb|AAH10504.1| DDHD2 protein [Homo sapiens]  
MNRITYTLFQRNPDFKGGVSIAGHSLGLSILFDILTNOKDSLGDIDSEKDSLNIIVMDQDPTLEEDLKK  
LQLSEFFDI FEKELVKDEALALCTDRDLQEIIGIPLGPRKILNLYFSTRKNSMGIKRPAQPASGANIPE  
SEFCSSNTRNGDYLDVIGQVSVKYPRLIYKPEIFFAFGSPIGMFLTVRGLKRIDPNYRFPTCKGFFNI

>gi|31565773|gb|AAH53664.1| ZFYVE28 protein [Homo sapiens]  
MNRFRKWLKPKKSDPQLLARFYADEELNQVAAELDSLDRKDPQRCTLLVVSQFRSCQDNVNIINQIM  
DECIPQDRAPRDFCVKFPPEIRHDNLAGQLWFGAECLAAGSIIMNRELESAMRPLAKELTRSLEDVIRGA  
LRDQALRDLNTYTEKMRALRHFDVLFAEFELSIVSAMVPVKS PREYVQVEVIVLFCETVERALDFGYL

>gi|15213263|gb|AAK85701.1| RAS guanyl releasing protein 4 [Homo sapiens]  
MNRKDSKRKSHQECTGKTGGRGRPRQVRRHKTCPSPREISKVMASMNGLLSEGGCSEDELLEKCIQSFD  
SAGSLCHEDHMLNMVLAHMSVWLPASADLAARLLTSYQKATGDTQELRLLIHLVRYWLMRHPVVMHQDP  
QLEEVIGRFWATVAREGNSAQRRLGDSDDLSPGGPGPPLPMSSPGLGKRRKVSLLFDHLETGELAQLHT

>gi|23268497|gb|AAN16405.1| male germ cell-associated kinase [Homo sapiens]  
MNRYYTTRQLGDTYGSVLMGKSNESGELVAIKRMKRFYSWDECMNLREVKSLKLNHANVVKLEKIVR  
ENDHLYFIFEYMKENLYQLMKDRNKLFPESVIRNIMYQILQGLAFIHKHGFHRDMKPENLLCMGPPELVK  
IADFLGLARELRSPYTDYVSTRWYRAPEVLLRSSVYSSPIDVWAVGSI MAELYMLRPLFPGTSEVDEIF

>gi|14042483|dbj|BAB55265.1| unnamed protein product [Homo sapiens]  
MNRKCFEEDFRIHVTDKKWTELDTNQHRTHAMRLLDGLEVTAREKRLKVARAILYVAQGTFGECSSAEV  
QSWMRYNIFLLLEVGTFNALVELLNMEIDNSAACSSAVRKPALSLADSTDLRVLLNIMYLIVETVHQECE  
GDKAEWRTMRQTFRAELGSPLYNNEPFAIMLFMVTKFCSGHAPHFPMKVVLLLLWKTIVLCTLGGFEELQ

>gi|14042655|dbj|BAB55339.1| GDP-fucose transporter 1 isoform a [Homo sapiens]  
MNRAPLKRSRILHMALTGASDPSAEAEANGKPFLLRALQIALVVS LYWVTSISMVFLNKYLLDPSPLRL  
DTPIFVTFYQCLVTTLLCKGLSALAACCPGAVDFPSLRDLDRVARSVLPLSVVFIGMITFNNLCLKYVGV  
AFYNVGRSLTTVFNVLVLLKQTTSFYALLTCGIIIGGFVWLVGDQGAEGTLSWLGTVFGVLA SLCVS

>gi|10438267|dbj|BAB15211.1| unnamed protein product [Homo sapiens]  
MNRFRVSKFRHTEARPPRESWISDIRAGTAPSCRNHKSSCSLIAFNDRPGVLTGIVPLQGGQEDKRRV  
AHLGCHSDLVTDLDFSPDDFLLATGSADRTVKLWRLPGPGQALPSAPGVVLPEDLPVEVLQFHPTSDG  
ILVSAAGTTVKVWDAKQPLTELAHGDVQSAVWSRDGALVGTACKDKQLRIFDPRTKPRASQSTQAH

>gi|109658572|gb|AAI17345.1| Hypothetical protein FLJ25444 [Homo sapiens]  
MNRSSNVPRKGILKSGTRSLQKVCRVHFANARNARSLLSMLKDISAQIQRRAWLSHTNKMIFRLLKHAIC  
AAEFYVTHEILKLVAPLEAKLIKDPMTQCKIRFRFRGETFPFPFIVFKIFLHTDGHGYKYFSGKNVLMPS  
KAVDDACKLMGERKFHRIIMEDERIFPKSKVTDIMDVVMTQDYVQYRSFFDEAPAFSGGRNNSWRKLNLE

>gi|71482952|gb|AAZ32415.1| receptor for advanced glycation end-products [Homo sapiens]  
MNRNGKETKSNYRVRVVQIPGKPEIVDSASELITAGVPNKVGTGCVSEGSYPAGTLSWHLDGKPLVPNEKGV  
SVKEQTRRHPELGFLTLQSELMVPTFARGDPRPTFSCSFSPGLPRHRALRTAPIQPRVWEVPVLEEVEQLV  
VEPEGGAAPGGTTLTCEVFVLPQSPQIHWMDGVPVPLPPSPVLILPEIGPQDQGTYSVATHSSHGFQ

>gi|13937759|gb|AAH06974.1| Chromatin modifying protein 5 [Homo sapiens]  
MNRFLGKAKPKAPPSTLDCIGTVDSRAESIDKKISRLDAELVVKYKDIKKMREGPAKMNVMKQKALRVLK  
QKRMYEQQRDNLAAQSFNMEQANYTIQSLKDTKTVDAMKLGVKEMKKAYKQVKIDQIEDLQDQLEDMM  
DANEIQEALSRSYGTPELDEDDLEAELDALGDELLADESSYLDEAASAPAIPEGVPTDTKNKDGVLVDE

>gi|12804487|gb|AAH01652.1| FWP1 homolog (S. cerevisiae) [Homo sapiens]  
MNRSRQVTCVAVWRVCVKAKETPKDVELSKEEVKRLIAEAKKLEQEGGSDEEETGSPSEDGMSARTQA  
RPREPLEDGDPEDDRTLDDELEAEYDLKDYDEEGDPAETLGESELLGLTVYGSNDQDYPVTLKDTQYER  
EDFLIKPNDNLIVCGRAEQDQCNLDVHVYVQEEDESFYVHHDILLSAYPLSVEWLNFDPSDDSTGNYIAV

>gi|16041765|gb|AAH15763.1| EPS8-like 1 [Homo sapiens]  
MNRTPRRIWGSSQDEALIREDIQGGALHNYRSGRGERRAALRATQEELQDRSPAETPPLQRRPSVR  
AVISTVERGAGRGRQAKPIPEAEAEARPEPVGTSNADSASPDGPRGPDLAVLQAEREVDILNHVFDD  
VESFVSRLQKSAAEARVLEHRERGRSRRAAGEGLTLRAKPPEAEYTDVLQKIKYAFSLARLRGNI

>gi|54611161|gb|AAH27965.1| G protein-coupled receptor 109A [Homo sapiens]  
MNRHLLQDHFLEIDKNCCVFRDDFIVKVLPPVGLLEFIFGLLGNGLALWIFCFHLKSWKSSRIFFNLA  
VADFLLIICLPFLMDNYVRRWDWKFWDIPLRLMLFMLAMNRRQGSIIFLTUVAVDRYFRVPHHALNKIS  
NRTAAIISCLLWGITIGLTVHLKMPIQGGANLCSFSICHTFQWHEAMFLEFFLPLGIILFCSAR

>gi|16877754|gb|AAH17114.1| Oligonucleotide/oligosaccharide-binding fold containing 2A [Homo sapiens]  
MNRVNDPLIFIRDIKPGLKLNLVVVFIVLEIGRVTKTGDEHVRCKVADKTSITISVWDEIGGLIQPGD  
IIRLTRGYASMWKGLTLYTGRGGELQKIGFECMVYSEVPNFSEPNPDYRQGNKGAQSEQKNNSMNSNM  
GTGTFGPVGNGVHTGPEGREHQSFSHAGRSNGRLINPQLQGTASNQVTMTTISNGRDPRAFRK

>gi|19343919|gb|AAH25676.1| EF-hand calcium binding domain 1 [Homo sapiens]  
MNRKKLQKLTDLTKNCKHFNKFVEVNCILKLYDLVGVVERQGLVVGLDNRNFRNIIHLVTFGMDDMIMD  
RVFRGFDKNDGCVNVLEWIHGLSLFLRGSLEEKMYCFEVDLNGDGFISKEEMFHMLKNSLLKQPSSE  
DPDEGIKDLVEITLKKMDHDHDKGLSFADYELAVRETTLLLEAFGPCLPDPSQMEFEAQVFKDPNEFND

>gi|27503783|gb|AAH42196.1| Mitochondrial translational release factor 1 [Homo sapiens]  
MNRHLCVWLFHRPSLNGYLQCHIQLHSHQFRQIHLDTLRQVFRQNRNRCILHLKSNWSRRYCHQDTKMLW  
KHKALQKYMENLSKEYQTLQCLQHIPVNEENRRSLNRRHAELAPLAAIYQEIQETEQAIEELESMCKSL  
NKQDEKQLQELALEERQTIQKINMPLYNELFQSLVPKEKYDKNDVILEVTAGRTTGGDICCQFTREIFDM

>gi|14250690|gb|AAH08811.1| Wingless-type MMTV integration site family, member 7A [Homo sapiens]  
MNRKARRCLGHFLSLGMVYLRIGGFSSVVALGASIIICNKIPGLAPRQRAICQSRPDIAIVIGEGSQMGL  
DECQFQFRNGRWNCALGERTVFGKELKVGSRFAAFYAI I AAGVAHAITA ACTQGNLSDCGDKEKQGGQ  
YHRDEGWKGGCSADIRYGIGFAKVFVDAREIKQNARTLMNHLNNEAGRKILEENMKLECKCHGVSGSCT

>gi|15779024|gb|AAH14588.1| Acrosomal vesicle protein 1 [Homo sapiens]  
MNRFLLLMSLYLLGSARGTSSQPNELSGSIDHQTTSVQQLPGEFFSLENPSDAEALYETSSGLNLTSEHGS  
SEHSSKHTVAEHTSGEHAESEHASGEPAATEHAEGEHTVGEQPSGEQPSGHEHLSGEPLESELESGEQPS  
DEQPSGHEHSGEPQPSGEQASGEQPSGHEHASGEQASGAPISSTGTILNCYTCAYMNDQGGKCLRGEGETCI

>gi|1888354|dbj|BAA09436.1| placental leucine aminopeptidase [Homo sapiens]  
MNRSSGLRNSATGYRQSPDGACSVSPARTMVVCAFVIVVAVSVIMVIYLLPRFTFTKEGCHKKNQSIGLI  
QPFATNGKLFPAQIRLPTAVVPLRYELSLHPNLTSMTFRGVSVTISVQALQVTWNIIHLSTGHNISRVTF  
MSAVSSQEKAELIYAYHGAIVAPEALLAGHNYTLKIEYSANISSYYGFYGFSTDESNEKKYFAA

>gi|219400|dbj|BAA39694.1| 2',3'-cyclic-nucleotide 3'-phosphodiesterase (CNPII) [Homo sapiens]  
MNRGFSRKSHFTFLPKIFFRKMSSGAKDKPELQFPFLQDEDTVATLLECKTLFILRGLPGSGKSTLARVI  
VDKYRDGTMKVSADAYKITPGARGAFSEYKRLDEDLAAYCRRRDIRILVLDNTHHERERLEQLFEMADQ  
YQYQVVVLEPKTAWRLCDALKEKNQWQLSADDLKLKPGLEKDFLPLYPGFYFGWFLTKKSSETLRKAGQVFL

>gi|5509901|dbj|BAA82509.1| WNT7a [Homo sapiens]  
MNRKARRCLGHFLFSLGMVYLRIGGFSSVVALGASIIICNKIPGLAPRQRAICQSRPDIAIVIGEGSQMGL  
DECQFQFRNGRWNCALGERTVFGKELKVGSRFAAFYAI I AAGVAHAITA ACTQGNLSDCGDKEKQGGQ  
YHRDEGWKGGCSADIRYGIGFAKVFVDAREIKQNARTLMNHLNNEAGRKILEENMKLECKCHGVSGSCT

>gi|9581841|dbj|BAB03458.1| beta-catenin-interacting protein ICAT [Homo sapiens]  
MNRGAPGKSPPEMYIQQKVRVLLMLRKMGSNLTASEEFLRTYAGVNSQLSQLPPHSIDQGAEDVMA  
FSRSETEDRRQ

>gi|13537119|dbj|BAB40757.1| PAR-6 gamma [Homo sapiens]  
MNRSFHKSQTLRFYDCSAVEVKSFKGAEFRFRSLDRHKPGKFEDFYKLVVHTHHISNSDVTIGYADVHGD  
LLPINDDNFCKAVSSANPLLRVFIQKREEAERGS LGAGSLCRRRRALGALRDEGPRRRAHLDIGLPRDF  
RPVSSIIDVDLVPETHRRVRLHRHGCEKPLGFYIRDGASVRVTPHGLEKVPGIFISRMVPGGLAESTGLL

>gi|30984140|dbj|BAC76765.1| MIST [Homo sapiens]  
MNRQGNRKTTEGSNDLKFQNFSLPKNRSWPRINSATGQYQRMNKPLLDWERNFAAVLDGAKGHSDDDDYD  
DPELRMEETWQS IKILPARPIKESYADTHYFKVAMDTPLPLDTRTISISIGQPTWNTQTRLERVDKPISR  
DVRSQNIKGDASVRKNKIFLPPRPLITLPPKYQPLPEPESSRPPLSRHTFPEVQGMPSQISLRDLSE

>gi|148744384|gb|AAI42704.1| GALNT5 protein [Homo sapiens]  
MNRIRKFFRSGRVLAFIFVASVIWLLFDMAALRLSFSEINTRVIKEDIVRRERIGFRVQPDQKIFYSS  
IKEMKPLLRLGHGKAWGKENVNRKTEESVLKVEVDLDQTRERKMQNALGRGKVVPLWHPAHLQTLPTVFN  
KQKTDGRGTPKEASSHQGTGPKQTAAQGAPKTSFIAAKGTQVVKISVHMGRVSLKQEPKSHSPSSDTSKL

>gi|24660208|gb|AAH39268.1| Chromosome 11 open reading frame 82 [Homo sapiens]  
MNRRRKFLASVLAALQNSFSFIYPSCQKCFSRILVSKRSNCPKCGSTGESGNANYRYKLSLKVAESNKL  
VITVFGSLDFTFFGLTATGLHRYIQDPNKIPETLDNDTTQNLTKAVETCFVGGQSFIFGVTNFENQPGQG  
SDASNFLQQCS DHKRAKALVACQIVLPDPGIAGFTVIDYFHQLLQTFNFRKLQCDQAPNNHLLALDHS

>gi|2105100|gb|AAC51319.1| Wnt7a protein [Homo sapiens]  
MNRKALRCLGHLFSLGMLVCLRIGGFSSVVALGATIICNKIPGLAPRQRAICQSRPDAIIVIGEGSQMGL  
DEKQFQFRNGRWNCALNGERTVFGKELKVGSRDGAFTYAI IAAGVAHAITAACHTGNLSDCGCDKEKQGG  
YHRDEGWKGGCSADIRYIGIFAKVFDAREIKQNARTLMNLHNEAGRKILEENMKLECKCHGVSGSCT

>gi|2827282|gb|AAC68502.1| TATA binding protein associated factor [Homo sapiens]  
MNRKKGDKGFESPRPYKLT HQVVCINNINFRKSVVGFVELTIFPTVANLNRIKLNKQCRIRYVRINDL  
EAAFIYNDPTLEVCHSESKQRNLNYFSNAYAAVSAVDPDAGNGELCIKVPSELWKHVDELKVLKIHINF  
SLDQPKGGLHFVVPVSEVGSMAERGAHVFCGYNSTRFWFPCVDSYSELCTWKLEFTVDAAMVAVSNGLD

>gi|4588015|gb|AAD25953.1|AF087651\_1 patched 2 [Homo sapiens]  
MNRSPPLRELPPSYTPPARTAAPQILAGSLKAPLWLRAYFQGLLFSLGGIQRHCGKVLFLGLLAFGALA  
LGLRMAI IETNLQLWVEVGSRSVQELHYTKEKLGEEAAYTSQMLIQTALQEGENILTPALGLHLQAAL  
TASKVQVSLYKGSWDLNKICYKSGVPLIENGMIERMIEKLFPCVILTPLDCEWEGAKLQGGSAYLPGRPD

>gi|1777757|gb|AAB40598.1| protein tyrosine phosphatase PTPCAAX2 [Homo sapiens]  
MNRPAVVEISYENMRFLITHNPTNATLNKFTTELKKYGVTTLVRVCDATYDKAPVEKEGIIHVLDWPFDDG  
APPPNQIVDDWLNLLKTKFREEPGCCVAVHCVAGLGRAPVLVALALIECGMKYEDAVQFIRQKRRGAFNS  
KQLLYLEKYRPMRLRFRDINGHCVCQ

>gi|6409468|gb|AAF08006.1|AF200715\_1 PTB domain adaptor protein CED-6 [Homo sapiens]  
MNRAFSRKKDKTWMHTPEALSKHFIPYNAKFLGSTEVEQPKGTEVVVDVAVRKLKFAHRIKSEGGQKIPKV  
ELQISIIYGVKILEBPKTKVQHNCQLHRISFCADDKTDKRIFTFICKDSESNKHLCYVFDSEKCAEEITLT  
IGQAFDLAYRKFLESGGKDVETRQKIAGLQKRIQDLETENMELKNKVQDLENQLRITQVSAPPAGSMTPK

>gi|6601438|gb|AAF18981.1|AF197927\_1 AF5q31 protein [Homo sapiens]  
MNRDRNVLRMKERERRNQEIQQGEDAFPPSSPLFAEPYKVTSKEDKLSRIQSMLGNYDEMDFIGDRS  
IPKLVAI PKPTVPPSADEKSNPNFFEQRHGGSHQSSKWTVPVGPAPSTSQSQRSSGLQSGHSSQRTSAGS  
SSGTNSSGQRHRESYNSGSSSRKKGQHGSEHSKSRSSSPGKQAVSSLNSSHRSRSHGNDHHSKEHQRS

>gi|112180563|gb|AAH36760.1| Chromosome 17 open reading frame 58 [Homo sapiens]  
MNRLLYLPDGFVFRVHMLALDSSSNCKPCPEFKPGSRYIVMGHIYHKRRQLPTALLQVLRGLRPGDGLL  
RSSSSYVKKRFNRKREGQIQGAVHTQCI

>gi|115292649|gb|ABI93268.1| WDR13 [Homo sapiens]  
MNRVAVYEDRPPGSSVPTSAEASRAMAGDTSLSENYAFAGMYHVFDQHVDEAVPRVRFANDDRHRLACCS  
LDGSI SLCQLVPAPPTVLRVLRGHTRGVSDFAWSLNDILVSTSLDATMRIWASEDGRICIREIPDPDSAE  
LLCCTFQPVNNLTVVGNAKHNHVMMNISTXKXKGGSSKLTGXVLALSFBAPGRXLWAGBDRGVSFSL

>gi|71297000|gb|AAH37925.1| DHX32 protein [Homo sapiens]  
MNRPAPELSMQALEDLDYLAALDNDGNLSEFGIIMSEFPLDPQLSKSILASCGFDCVDEVLTIAAMVTAP  
NCFSHVPHGAEAAALTCWKTFLHPEGDHFTLISIIYKAYQDITLNSSEYCVKWCRCYFLNCSALRMADV  
IRAGLLEI IKRIELPYAEPAFGSKENTLNIKKALLSGYFMQIARDVDGSGNYLMLTHKQVAQLHPLSGYS

>gi|71052177|gb|AAH92497.1| LOC283951 protein [Homo sapiens]  
MNRVLCAPAAGAVRALRLIGWASRSLHPLGSRDRAHPAAEEEDDPPDRPIEFSSSKANPHRWSVGHMTGK  
GHQRPWWKVLPLSCFLVALI IWCYLREESEADQWLRQVWGEVPEPSDRSEEPETPAAYRART

>gi|55959802|emb|CAI15869.1| family with sequence similarity 21, member A [Homo sapiens]  
MNRTPDQELAPASEPVWERPWSVEEIRRSSQSWSLAADAGLLQFLQEFSSQQTISRTHEIKKQVDGLIRE  
TKATDCRLHNVFNDFLMSNTQFIENRVYDEEGSVGSDRGSIVDTEEEKEEESEDEFAHHSNEQNRHT  
TQMSDEEEDDDGCDLFDADSEKEEEDIEDIEENTRPKRSRPTSFADELAARIKGDVAVGRVDEEPTLPSGE

>gi|55665694|emb|CAH70724.1| PHD finger protein 8 [Homo sapiens]  
MNRRAIVQRGRVLPPLPPAPLDTTNLAGRRTLQGRAKMASVPVYCLCRLPYDVTRFMIECDMCQDWFHGSC  
VGVVEEKAADIDLHPCNCEVLHGPSIMKKRRGSSKGGHDTKKGKPVKTGSPPTFVRELRSRTFDSSDEVIL  
KPTGNQLTVEFLEENSFSVPILVLKDLGMLTLPSPSFTVRDVEHYVGS DKEIDVIDVTRQADCKMKLGD

>gi|21595401|gb|AAH32370.1| NNT protein [Homo sapiens]  
MNRSLANVILGGYGTSTAGGKPMIEISGTHTEINLDAIDMIREANSIIITPGYGLCAAKAQYPIADLVK  
MLTEQGGKVRFGIHPVAGRMPGQLNVLLAEAGVPYDIVLEMDEINHDFPDTDLVVLVIGANDTVNSAAQED  
PNSIAGMPVLEVWKSQVIVMKRSLGVYAAVDNPIFYKPNAMLLGDAKKTCDALQAKVRESYQK

>gi|16878182|gb|AAH17296.1| SESN3 protein [Homo sapiens]  
MNRGGGSPSAAANYLLCTNCRKVLKDKRIRVSQLTRGPSAFIPEKEVVQANTVDERTNFLVEEYSTSG  
RLDNITQVMSLHTQYLESFLRSQFYMLRMDGPLPLPYRHYIAIMAAARHQCSYLINMHVDEFKLTGGIAE  
WNLNGLEYVPQRLKNLNEINKLLAHRPWLITKEHIQKLVKTGENNWSLPELVHAVVLLAHYHALASFVFGS

**MRRR**

>gi|49457454|emb|CAG47026.1| H2AFB [Homo sapiens]  
MRRRRRRRSGSAGGRGRTCSRTRVRAELSFVSQVVERSLREGHYAQRSLRTAPVYLAAVIEYLTAKVPEL  
AGNEAQNSGERNITPLLLDMVHNDRLSLTLFNNTTISQVAPGED

>gi|30349719|gb|AAP22172.1| BCL-3 binding protein [Homo sapiens]  
MRRRRKNLGGNPFKRTANPKKEVVVSSVASREEPTTTLPSMGETKVDQEELFTSISEIFSDLDPDVVYMLL  
SECDFKVENAMDCLLELSATDTKIEESSQS FVASENQVGAESKIMEKRPEEESSEDSKMSDFLDMQLTE  
DLDSLIIQNAFEKLNSSPDDQVYFSLPSQDVNSFNDSSSEFINPDSNMTPIFSTQNMNLNGENLENSGTL

>gi|30582151|gb|AAP35302.1| carbonic anhydrase XII [Homo sapiens]  
MRRRSLHAAAVLLLVILKEQPSSPAPVNGSKWTFYFGPDGENSWSKKYPSCGLLQSPIDLHSDILQYDAS  
LTPLEFQGYNLSANKQFLLTNNGHVSVKLNLPSDMHIQGLQSRYSATQLHLHWGNPNDPHGSEHTVSGQHF  
AAELHIVHYNSDLYPDASTASNKSEGLAVLAVLIEMGSFNPSYDKIFSHLQHVKYKQEAFFVPGFNIEEL

>gi|31873254|emb|CAD97618.1| ubiquitin interaction motif containing 1 [Homo sapiens]  
MRRRKKVKEVSESRNLEKKDVETTSSVSVKRRRLEDAFIVISDSGEEPKENGLQKTKTKQSNRAKC  
LAKRRIAQMTEEEQFALALKMSEQEAREVNSQEEEEELLRKAIAESLNSCRPSDASATRSRPLATGPSS  
QSHQEKTDSGLTEGIWQLVPPSLFKGSHISQNEAEEREPEWDHTEKTEEEPVS GSSGSDWQSSQPVFE

>gi|34364882|emb|CAE45871.1| teashirt family zinc-finger [Homo sapiens]  
MRRRQQAPKRAAGYAQEELKKEEIEKEEEDSGSVAQLQGGNDTGTDELELTGPEQKGCFSYQNSP  
GSHLSNQDAENESLLSDASDQVSDIKSVCGRDASDKKAHTHVSPLPNEAHNCMDKMTAVYANILSDSYWSG  
LGLGFKLSNSERRNCDTRNGSNKSDFDWHQDALS KSLQQLNPSRSVSKPSLFSVQLCRQSSKMC GTVFT

>gi|52546031|emb|CAH56184.1| teashirt zinc finger homeobox 3 [Homo sapiens]  
MRRRQQAPRRAAAYVSEELKAAALVDEGLDPEEHTADGEP SAKYMCPEKELARACPSYQNSPAAEF SCH  
EMDSESHISETSDRMADFESGSIKNEETKEVTVPLEDTTVSDSLEQMKAVYNNFLSNSYWSNLNLHLHQ  
PSSEKNGSSSSSSSSSSSCGSGSFDWHQSAMAKTLQQVVSQSRMLPEPSLFTVQLYRQSSKLYGSI FTG

>gi|24429592|ref|NP\_061060.3| chondroitin sulfate N-acetylgalactosaminyltransferase 2 [Homo sapiens]  
MRRRGLILHTRTHWLLLGLALLCSLVLFMYLLECAPQTDGNASLPGVGENYKKEYYQALLQE QEEHYQT  
RATSLKRQIAQLKQELQEMSEKMRSLQERRNVGANGIGYQSNKEQAPSDLLEFLHSQIDKAEVSI GAKLP  
SEYGVIPFESFTLMKVQLEMGLTRHPEEKVPRKDKRDELVEVIEAGLEV INNPDEDDEQEDEEGPLGK

>gi|52545656|emb|CAB99097.2| calcineurin binding protein 1 [Homo sapiens]  
MRRRRRGIWRI PVDEIDRPGSFAWHMNRIVLLLKVLALQLRDHSTLLKVSSMLQRTPDQGGKYLRDADR  
QVLAQRAFILTVKLEDLSELAEGSERPGPKVCGLPGARMTTDVSHKASPEDGQEGLPQPKPPLADGS  
GPGPEPGKVGLLNHRPVAMDAGDSADQSGERKD KESPRAGPTPEMDTSEATVCHSDLERTPPLLPGRFA

>gi|21617878|gb|AAL85487.2| zinc finger 298 [Homo sapiens]  
MRRRRPPASGAAGFPERIATRS DPDIPLCTFQRQPRAPVQPPCRLFFVT FAGCGHRWRSESKPGWISRS  
RSGIALRAARPPGSSPPRPAAPRPPPGGVVAEAPGDVVI PRPRVQPMRVARGGPWTPNPAFREAESWSQ  
IGNQRVSEQLLETS LGNEVSDTEPLSPASAGLRRNPALPPGPFQNF SWGNQENLPPALGKIANGGGTGA

>gi|21619719|gb|AAH32640.1| MYST histone acetyltransferase 2 [Homo sapiens]  
MPRRKRNAGSSSDGTEGDFSTLEHTDSSSEDTGTSRRSARVTRSSARLSQSSQDSSPVRNLQSFQTEEP  
AYSTRRVTRSQQPTPVTFKKYPLRQTRSSGSETEQVVDFSDRETAKNTADHDESPPTPTGNAPSSSESDI  
DISSPNVSHDESIAKMSLKDSDLSHRPKRRRFHESYNFMKCPPTPGCNSLGHILTGHKHERHFSISGCP

>gi|30354480|gb|AAH52282.1| Zinc finger protein 513 [Homo sapiens]  
MPRRKQSHFPVKCEGVKVDTEDSLDEGPGALVLES DLLLGQDLEFEHEEEEEEGDGNSDQLMGFERDSE  
GDSLGLARPGLPYGLSDDES GGGALSAESEVEEPARGPGEARGERPGPACQLCGGPTGEGPCCGAGGPGG  
GPLLPPRLLYSCLRCTFVSHYSSHLKRHMQTHSGEKPFRCGRCPYASACLVLNLTRHTRHTTGEKPYRCFH

>gi|37573995|gb|AAH58831.1| Von Hippel-Lindau tumor suppressor [Homo sapiens]  
MPRAENWDEAEVGAEEAGVEEYGPEDDGGEEESGAEESGPEESGPEELGAEEMEAGRPRVLRVSVNSRE  
PSQVIFCNRSPRVVLPVWLNFDGEPQPYPTLPGTGRRRISYRVYTLKERCLQVVRSLVKPENYRRLDIV  
RSLYEDLEHDPNVQKDLERLTQERIAHQRMGD

>gi|109658602|gb|AAI17408.1| ZNF827 protein [Homo sapiens]  
MPRRKQEQPKRPLSHVSRQEEAEGLSEGEHWHYGNSSETPSEASYGEVQENYKLSLEDRIQEQTSPDTS  
LGSTTPSSHTLLELVALDSEVLRLDSLQCQDHLSPGVSSLCDDDPGSNKPLSSNLRLLEAGSLKLDAAATA  
NGRVESPVNVGNSLFSFPPSHHAQQLSVLARKLAEKQEQNDQYTPSNRFIWNQGWLPNSTTTCSLSPDS

>gi|21320090|gb|AAM44451.1| p53-activated protein-2 [Homo sapiens]  
MPRRSPVPPRAPSRSRGRKRDSCQRRRSARNASQRMARQRRMAHLQPPAGASPPAWAGRRRGTRQLRSLQ  
RQTGRQPVRVQLAPPAPLFPNPQNCRRKTRSRPRMELPGPPRNLAQKSSIRRLFPRKGSWANHHC  
PRWHGKRQGLWSSGVACFRVGP RRKH

>gi|38174502|gb|AAH60779.1| Cytochrome b5 domain containing 1 [Homo sapiens]  
MPRRGLVAGPDLEYFQRRYFTPAEVAQHNRPEDLWVSYLGRVYDLTSLAQEYKGNLLKPIVEVAGQDIS  
HWRDPKTRDIRKHIDPLTGCLRYCTPRGRFVHVPPQLPCSDWANDFGKFWWQGSYYEVGRLSAKTRSI  
INTLTSQEHTLEVGVLES IWEILHRYLPHYNASHAASYTWKYEGKNLNMDFTLLENGIRDEEEEFDYLSMDG

>gi|112818466|gb|AAI22528.1| Progesterone and adipoQ receptor family member IX [Homo sapiens]  
MPRRLQPRGAGTKGPPAPAPAASGAARNSSAASRDPPASAKPLLRWDEVDPDFVECFILSGYRRLPCTA  
QECLASVLKPTNETLNFWTFHIFPLLLFLSKFCRLFFLSGGDVPFHHPWLLPLWCYASGVLLTFAMSC  
TAHVFSCLSLRLRAAFYLDYASISYVGGSTVAYYYYYLLPGLSLLDARVMTPYLQQLRWLVHVDCTRLIAAYR

>gi|12652549|gb|AAH00014.1| PCYOX1L protein [Homo sapiens]  
MPRRAKSVREGRAVVGAGIGGSAVAHFLQOHFGPRVQIDVYEKGTVGGRLATISVNKQHYESGAASFHSL  
SLHMQDFVKLLGLRHRREVVGSAIFGGEHFMLEETDWYLLNLFRLLWWHYGISFLRLQMWVEEVMK  
FMSYQSAAMPFAFAGAMSLAQAQGLSWSVEGGNKLVCSGLLKLTKANVIHATVTSVTLHSTEGKALYQVAYEN

>gi|55859678|emb|CAI10875.1| NIMA (never in mitosis gene a)-related kinase 6 [Homo sapiens]  
MPRREVCWEAAHFRQEEQSLPRPRVRLVRLACRMAGQPGHMPHGSSNNLCHTLGVPVHPPDPQRHPNTL  
SFRCSLADFQIEKKIGRQGFSEVYKATCLLDRKTVALKKVQIFEMMDAKARQDCVKEIGLLKQLNHPNII  
KYLDSFIEDNELNIVLELADAGDLSQMIKYFKKQKRLIPERTVWKYFVQLCSAV

**MSAKR**

>gi|56205624|emb|CAI23537.1| chromosome 1 open reading frame 49 [Homo sapiens]  
MSAKRAELKKTLSKKNYKAVCLELKPPTKTFDYKAVKQEGRTKAGVTQDLKNELELVREELKEKMEEI  
KQIKDLMDKDFDLHEFVEIMKEMQKDMDEKMDILINTQKNYKPLRRAPKEQQLRLMGKTHREPQLRP  
KKMDGASGVNAPCALHKKTMAPQKTKQGS LDP LHHCGTCCEKCLLCAKNNYNRGNI PSEASGLYKGG  
EPVTTQPSVGHAVPAPKSQTEGR

**MSPRR**

>gi|37181574|gb|AAQ88596.1| SPRR1965 [Homo sapiens]  
MSPRRTLPRPLSLCLSLCLCLAAALGSAQSGSCRDKKCKVVFSSQQLRKRLTPLQYHVTVQEKGTESA  
FEGEYTHHKDPGIYKCVCGTPLFKSETKFDGSGGWPSFHDVINSEAITFTDDFSYGMHRVETSCSQCGA  
HLGHI FDDGPRPTGKRYCINSAALSFTPADSSGTAEGGSGVASPAQADKAEL

**MSQKR**

>gi|49168640|emb|CAG38815.1| ENSA [Homo sapiens]  
MSQKREENPAEETGEEKQDTQEKEGILPERAEAKLKAKYPSLGQKPGGSDFLMKRLQKQKYFDSGDY  
NMAKAKMKNQQLPSAGPDKNLVTDHIIPTPQDLQQRKSSLVTSKLAGGQVE

>gi|23468338|gb|AAH38415.1| Testis specific, 13 [Homo sapiens]  
MSQKRQTKFQNGSKTSENSAKREKGMVNSKEISDAVGQSKFVLENLRHYTVHPNLAQYKPLKATAL  
QKFLAQNRKNTSFMKVYDQDKTLLIMTNPPPCSITQQDKESASKYFSKELLLKVMESHQHKPTEN  
LWLPRMPQKKLRSKLPKIFPLILSDDPTSKREQWFRFSTDNDFKSEKYSKYVALRTQKKMYPQLTFAP

**MGNK**

>gi|54696786|gb|AAV38765.1| DNA-dependent protein kinase catalytic subunit-interacting protein 2 [Homo sapiens]  
MGNKQTIPTFEEQLDNYQDCTFFNKKDILKLHSRIFYELAPNLVPM DYRKSPIVHVPM SLIIQMPELRENPF  
KERIVAAAFSEEDGEGLNFNFDFVDMFVSLCESAPRELKANYAFKIYDFNTDNFICKEDLELTLARLTKSEL  
DEEKVVLCNKVIEEADLDGDGKLGFADEFEDMIAKAPDFLSTFHIRI

>gi|109731327|gb|AAI13592.1| Calcium and integrin binding family member 3 [Homo sapiens]  
MGNKQTVTFTEQLLEAYQDCTFFTRKEIMRLFYRYQDLAPQLVPLDYTTCPDVKVVPYELIGSMPELKDNP  
RQRIAQVFSSEDDGHMTLDNFDMFVSMSEMAPRDLKAYYAFKIYDFNNDYICAWDLEQTVTKLTRGEL  
SAEEVSLVCEKVLDEADGDHGRSLSEDFQNMILRAPDFLSTFHIRI

**MSNKR**

>gi|71681732|gb|AAI00979.1| RHBDL3 protein [Homo sapiens]  
MSNKRNSNSFRQAILQGNRRLSSKALLEEKGLSLSQLRIRHVAYETLPREIDRKWYYSYTCPPFPWFMIT  
VTLLLEVAFFLYNGVSLGGFVQLQVTHPRYLKNSLVYHPQLRAQVWRYLYTFMHAGIEHLGLNVVLQLLVG  
VPLEMVHAGTRIGLVYVAGVAVAGSLAVSVADMTAPVVGSSGGVYALVSAHLANIVMNWSGMKQCFKLLRM

**MPK**

>gi|49457240|emb|CAG46919.1| HMG2 [Homo sapiens]  
MPKRKAEGDAKGDKAKVDEPQRRSARLSAKPAPPKPEPKKAPAKKGEKVPGKKGKADAGKEGNNPA  
ENGDAKTDQAQKAEGAGDAK

>gi|48145919|emb|CAG33182.1| ATOX1 [Homo sapiens]  
MPKHEFSVDMTCGGCAEAVSRVLNKLGGVGYDIDLPNKKVCIESEHSMDTLLATLKKTKGTVSYLGLD

>gi|48145921|emb|CAG33183.1| PC4 [Homo sapiens]  
MPKSKELVSSSSSGSDSDSEVDKKLKRKKQVAPEKPVKKQKTGETSRALSSSKQSSSSRDNDNFQIGKMR  
YVSVRDFKGVKVLIDIREYWMDEPEGEMKPRKGI SLNPEQWSQLKEQISDIDDAVRKL

>gi|48146019|emb|CAG33232.1| G10 [Homo sapiens]  
MPKVKRSRKAAPPDGWELIEPTLDELQKMR EAETEPHEGKRKVESLWPIFRHHQKTRYIFDLFYKRKAI  
SRELYEYCIKEGYADKNL IAKWKKQGYENLCLLRICIQTRD TNFGTNCICRVPKSKLEVGRIIECTHCGR  
GCSG

>gi|48146313|emb|CAG33379.1| B3GAT1 [Homo sapiens]  
MPKRRDILAIVLIVLPWTLITVWHQSTLAPLLAVHKDEGSDPRRETPPGADPREYCTSDRDIVEVVRTE  
YVYTRPPPWSDTLPTIHVVTPYSRPVQKAELTRMANTLLHVPNLHVLVVEDAPRRTPLTARLLRDTGLN  
YTHLHVETPRNYKLRGDARDPRI PRGTMQRNLALRWLRETFPRNSSQPGVVYFADDDNTYSLELFEEMRS

>gi|48146455|emb|CAG33450.1| HSPC111 [Homo sapiens]  
MPKAKGKTRRQKFGYSVNRKRLNRNARRKAAPRIECSHIRHAWDHAKSVRQNLAEMLAVDPNRAVPLRK  
RKVKAMEVDIEERPKELVKRPYVLDLEAEASLPEKKGNTLSRDLIDYVRYMVENHGEDYKAMARDEKNY  
YQDTPKQIRSKINVYKRFYPAEWQDFDLSLQKRKMEVD

>gi|6094650|gb|AAF03506.1|AC004922\_3 unknown [Homo sapiens]  
MPKGGRGHGHKGRARQYTSPEEIDAQLQAEKQKAREEEEEQKEGGDGAAGDPKKEKKS LDSDESEDEEDDY  
QQRRKGV EGLID IENPNRVAQTTKKV TQLDLGPKELSRREEEIEKQKAKERYMKMHLAGKTEQAKADL  
ARLAIIRKQREEAARKKEERKAKDDATLSGKRMQSLSLNK

>gi|7717365|emb|CAB90453.1| human non histon chromosomal protein HMG14 [Homo sapiens]  
MPKRKVS SAEGA AKEEPKRRSARLSAKPPAKVEAKPKAAAKDKSSDKKVQTKGKRGAKGKQAEVANQET  
KEDLPAENGETKTEESPASDEAGEKEAKSD

>gi|11693450|emb|CAC18679.1| NOA36 protein [Homo sapiens]  
MPKKTGARKKAENRREREKQLRASRSTIDLAKHPCNASMECDKQRRQKNRAFCYFCNSVQKLPICACQC  
GKTKCMMKSSDCVIKHAGVYSTGLAMVGAICDFCEAWVCHGRKCLSTHACACPLTDAECVCECERGVWDHG  
GRIFSCSFCHNFLCEDDQFEHQASCQVLEAETFKCVSNCNRLGQHSCLRCKACFCDDHTRSKVFKQEKQKQ

>gi|36647|emb|CAA43925.1| ribosomal protein L7a [Homo sapiens]  
MPKGGKAKGKVVAPAPAVVKKQEAKKVVNPLFEKRPKNFGIGQDIQPKRDLTRFVKWPRYIIRLQRQRAIL  
YKRLKVPAINQFTQALDRQTATQLLKLAKHYRPETKQEKQRL LARAEKKAAGKGDVPTKRPVLRAGV  
NTVTTLVENKKAQLLVIAHDVDP IELVVFLPALCRKMGPVYCI IKGKARLGRLVHRKTCTTVAFTQVNSE

>gi|32022|emb|CAA46925.1| AP endonuclease 1 [Homo sapiens]  
MPKRGKGA VAEDGDEL RTEPEAKSKTAAKNDKEAAGEGPALYEDPPDQKTSPSGK PATLKICSWNVD  
GLRAWIKKGLDWVKEEAPDILCLQETKCSENKLP AELQELPGLSHQYWSAPSDEKGYSGVGLLSRQCPL  
KVSYGIGDEEHDQEGRVI AEFDSFVLTAYV PNA GRGLVRLEYRQRWDEAFRKF LKGLASRKLPLVLCGD

>gi|57161864|emb|CAE12159.1| very long-chain acyl-CoA synthetase homologue 3 [Homo sapiens]  
MPKPPKPRNNLEDRHNPGIQGRREHRPFGFRVRAASSPGGSAPRAERRLWEGEWESGAAPHPHSSRVSAL  
RPCGVVGAWVGMGVCQRTRAPWKEKSQLERAALGFRKGGSGMFASGWNQTVPIEEAGSMAALLLPLLLL  
LPLLLLMLHLWPLRWRPADLAFVRAALCCKRALRARALAAAAADPEGFEGGCSLAWRLAELAQQRAAHT

>gi|30582579|gb|AAP35516.1| proprotein convertase subtilisin/kexin type 7 [Homo sapiens]  
MPKGRQKVPHLDAFLGLPTCLWLELAGLFLVWPVMGLAGTGGPDGQGTGGPSWAVHLESLEGDGEETL  
EQQADALAAQAAGLVNAGRIGELQGHYLFVQVAGHRPALEVEAIRQQVEAVLAGHEAVRWSEQRLLRRAK  
RSVHFNDPKYPQQWHLNRRSPGRDINVTGVWERNVTGRGVTVVVDDGVEHTIQDIAPNYSPEGSYDLN

>gi|30582967|gb|AAP35727.1| eukaryotic translation initiation factor 1A [Homo sapiens]  
MPKNKKGKGNRRRGKNESEKRELVFKEDGQYEAQVIKMLGNRLEAMCFDGVKRLCHIRGKLRKKVW  
INTSDIILVGLRDYQDNKADVILKYNADARSLLKAYGELPEHAKINETDTFGPGDDDEIQFDDIGDDDED  
IDDI

>gi|30583083|gb|AAP35786.1| FK506 binding protein 7 [Homo sapiens]  
MPKTMHFLFRFVFFYLVGLFTAQRQKKEESTEEVKIEVLHRPENCSKTSKKGDLLNAHYDGYLAKDGSK  
FYCSRTQNEGHPKWFLVGVQVIKGLDIAMTDMCPGKEKRKVVIPPSFAYGKEGYAEGKIPPDATLIFEIE  
LYAVTKGPRSIEFTFKQIDMDNDRQLSKAEINLYLQREFEKDEKPRDKSYQDAVLEDFKKNHDHGDGDFIS

>gi|30583201|gb|AAP35845.1| cysteine-rich protein 1 (intestinal) [Homo sapiens]  
MPKCPKCNKEVYFAERVTSLGKDWHRPCLKCEKCGKTLTSGGHAHEGKPYCNHPCYAAAMFGPKGFGRRG  
AESHTFK

>gi|30583429|gb|AAP35959.1| zinc finger protein 339 [Homo sapiens]  
MPKVFLVKRRSLGVSVRSWDELPEKCRADTYIPVGLGRLLHDPEDCRSDGGSSSGSGSSSAGEPGGAES  
SSSPHAPESETPEPDAEGPDGHLATKQRPVARSKIKFTTGTCSDSVHSCDLCGKGFRLQRMLNRHLKC  
HNQVQRHLCTFCGKGFNDTDFLKRHVTRHTGIRPYKCNVCNKAFQTQCSLESHLKKIHGVQQQYAYKQRR

>gi|56204187|emb|CAI18832.1| solute carrier family 6, member 17 [Homo sapiens]  
MPKNSKVTQREHSEHVTVESVADLLALEEPVDYKQSVLNVAGEAGGKQKAVEEELDAEDRPAWNSKLQYI  
LAQIGFSVGLGNIWRFPYLCQKNGGAYLVPLYVLLIIIGIPLFFLELAVGQRIIRGSGVWHYICPRLG  
GIGFSSCIVCLFVGLYINVIIGWSIFYFFKSFQYPLWSECPVVRNGSVAVVEAECEKSSATYFYWYREA

>gi|56204352|emb|CAI20350.1| small nuclear ribonucleoprotein polypeptide C [Homo sapiens]  
MPKFYCDYCDTYLTHDSPSVRKTHCSGRKHKENVKDYQKWMEEQAQSLIDKTTAAQQGKIPPTPFSAP  
PPAGAMIPPPSLPGPPRPGMMPAPHMGGPPMMPMMPGGPPMMPVGPAPGMRPPMGGHMPMMPGPPMMP  
PPARPMMPVTRPGRMTRPDR

>gi|56417845|emb|CAI22233.1| mRNA turnover 4 homolog (S. cerevisiae) [Homo sapiens]  
MPKSKRDKKVSLSLTKTAKGLELQNLIEELRKCVDTYKYLFIFSVANMRNSKLDIRNAWKHSRMFFGKN  
KVMVALGRSPSEYKDNLHVQSKRLRGEVGLFTNRTKEEVNEWFTKYTEMFYARAGNKAFTVSLDFG  
PLEQFPHSMEPQLRQLGLPTALKRGVVTLSDYEVCKEGDVLTPEQARVLKLFGEYMAEFKVTIKYMWDS

>gi|56203523|emb|CAI18951.1| breast cancer anti-estrogen resistance 3 [Homo sapiens]  
MPKECSAFHALSAAALCCFYHRKFSFIGVFKSKERHIMDRTPPEKLKKELEEEELLSSSEDLRSHAWYHGRIPR  
QVSENLVQRDGDFLVRDSLSPGNFVLTQWKNLAQHFKINRTVLRLESEAYSRVQYQFEMESFDSIPGLV  
RCYVGNRRPISQSGAIFQPINRTVPLRCLLEHYGTSFGQAREGSLTKGRPDVAKRSLTMGGVQAREQ

>gi|38708276|gb|AAR27293.1| NO52 protein; hsNO52 [Homo sapiens]  
MPKAKPTGSGKEEGPAPCKQMKLEAAGGPSALNFDSPSSLFESLISPIKTEFFKEFWEQKPLLIQRDD  
PALATYYGSLFKLTDKLSLCSRGMYYGRDVNVCRCVNGKKVNLKDGKAHFLQLRKFDFQKRATIQFHQP  
QRFKDELWRIQEKLECYFGLSVGSNVYITPAGSQGLPPHYDDVEVFILQLEGEKHWRLYHPTVFLAREYS

>gi|46362467|gb|AAH69013.1| ANKRD11 protein [Homo sapiens]  
MPKGGCPKAPQQEELPLSSDMVEKQTKGKDKDVSLTKTPKLERGDGKKEVREERASKRKLPTTAGANGEQ  
KDSDEKQGPERRKRIKKEPVTRKAGLLFGMGLSGIRAGYPLSERQQVALLMQMTAEEANSVPDTPPKHP  
SQSTVQCQKGTPNASAKTKDKVNRNERGETRLHRAAIRGDARRIKELISEGADVNVKDFAGWTALHEACN

>gi|47123440|gb|AAH70234.1| ANKRD12 protein [Homo sapiens]  
MPKSGFTKPIQSENSDSDSNMVEKPYGRKSKDKIASYSKTPKTIERSDVSKEKESMSMKRKLPTTISPSR  
NEERDSDTEKEGPEKKTKEAGNKKSTPVSILFGYPLSERQKQALLMQMTARDNSPDSTPNHPSQTPPA  
QKKTSSSSSRQDKVKNRNERGETPLHMAAIRGDVVKQVKELISLGNANVVKDFAGWTPLEACNVGYDV

>gi|54696640|gb|AAV38692.1| interferon-related developmental regulator 1 [Homo sapiens]  
MPKNKKRNTPHRGSAGGGGSGAAAATAATAGGQHRNVQPFSDAS IETMSHCSGYSDDPSSFAEDGPEV  
LDEEGTQEDLEYKLGKLDLTLDKSAKTRQAALEGIKNALASKMLYEFILERRMTLTDSEIRCLKKGKSD  
EQRAAAAALASVLCIQLGPIESEIEILKTLGPIKIIICDGSASMQRQTTCATCFGVCCFIATDDITELYS



>gi|40795897|gb|AAR91619.1| hornerin precursor [Homo sapiens]  
MPKLLQGVTVIDVVFYQYATQHGEYDTLNKAELKELLENEFHQILKNPNPDPDVTDIILQSLDRDHNNKVD  
LHPSLYFDAGEIQAMRQSRASHLHLFRAIRSAVTVMLSNPTYLPPPKHADFAAKWNEIYGNLPLPLAL  
SRNVRGSLKPGTESISRRLSFRQDFSGQHNSYSGQSSSYGEQNSDSHQSSGRGQCGSGSGQSPNYGQHGS

>gi|62702307|gb|AA93231.1| cytochrome c oxidase assembly factor 5 [Homo sapiens]  
MPKYEDKPGGACAGLKDGLACLLQSDCVVQEGKSPRQCLKEGYCNLSKYAFFECKRSVLDNRARFRG  
RKGY

>gi|23451958|gb|AAN32895.1| NCAG1 [Homo sapiens]  
MPKGGAPPWIMALMFTGHLFLALLMFAFSTFEESVSNYSEWAVFTDDIDQFKTQKVQDFRPNQKLLKSM  
LHPSLYFDAGEIQAMRQSRASHLHLFRAIRSAVTVMLSNPTYLPPPKHADFAAKWNEIYGNLPLPLAL  
YCLLCPEDKVAFEFVLEYMDRMVGYKDWLVENAPGDEVFIGHSLTGFATAFDFLYNLLDNHRRQKYLEKI

>gi|7023440|dbj|BAA91964.1| proline rich 11 [Homo sapiens]  
MPKFKQRRRKLKAKAERLFKKEASHFQSKLITPPPPPPSPERVGISSIDISQSRSWLTSSWNFNFPNIR  
DAIKLWTRVWSIYSWCQNCITQSLVLDKTIFFPSRICHRELYSVKQQFCILESKLCKLQEAALKTISESS  
SCPSCGQTCHMSGKLTNPVACVLITPGDSKAVLPPTLQPASHFPPPPPPPLPPPPPLAPVLLRKPSL

>gi|10434488|dbj|BAB14274.1| sodium-dependent neutral amino acid transporter B(0)AT2 isoform 2  
[Homo sapiens]  
MPKNSKVVKRELDVDESVDKLLSNEDAADDAFKTSELIVDQGEKDTDVEEGSEVEDERPAWNSKLQY  
ILAQVGFVGLGNVWRFPYLCQKNGGGAYLLPYLILLMVGIPLFFLELSVQRIIRRSIGVWNYISPVL  
GGIGFASCVVCFVALYVNIIVIGWSLFYFSQSFQQPLPWCPLVKNASHTFVEPECEQSSATYYWYRE

>gi|34783430|gb|AAH32424.1| NOP16 protein [Homo sapiens]  
MPKAKGTRRQKFGYSVNRKRLNRNARRKAAPRIECSHIRHAWDHAKSVRQNLAEMLAVDPNRAVPLRK  
RKVKAMEVDIEERPKELVRKPYVLDLAEASLPEKKGNTLSRDLIDYVRYMVENHGEDYKQSGKTSIL  
CRRGRWRWSDFWTSQLPQAEASPGPVKLEPGCKARRCCVAPEELARSHGIRRLHHTVHTPRSGEGTVLRG

>gi|16877478|gb|AAH16987.1| biorientation of chromosomes in cell division 1-like [Homo sapiens]  
MPKRRKQHYLSSEDEPDNDVLDLSDRIETAQRQCPETEPHDTEENSRDLEELPKTSSETNSTTSRVME  
EKDEYSSSETTGKPEQNDDDTIKSQEEDQPIIKRKRGRPRKYPVETTLKMKDSDKTDGTIVTVEQSPS  
SSKLVKMTDESNETANLQERSISNDGEEKIVTSVRRRGRKPKRSLTVSDDAESSEPERKQKSVSDP

>gi|74353578|gb|AAI01941.1| OGFOD2 protein [Homo sapiens]  
MPKGRPNMTMNYGVLLHLEGLDEPLMTPLRERFLQPLMALLYPDCGGGRDLSHRAVVKYAPGQDLELGC  
HYDNAELTLNVALGKVFYGGALYFGGLFQAPTALTEPLEVEHVVGQVLRHGGQLHGARPLGTGERWNLV  
VWLRASVTRNSLCPMCCREPDLDVDEGFGDGFREEPATVDVCALT

>gi|20380886|gb|AAH28127.1| Chromosome 10 open reading frame 53 [Homo sapiens]  
MPKNAVILRYGPYSAAGLPEVHHTFRLQGLQAVLAIDGHEVILEKIEDWNVVELMVNEEVIFHCNIKDL  
EFGKLTSSDKRRTSSSRLTFHQQLSSPCGMKVSPLQQFPQKTQDLTICIVLAQIGSCIHFQTNLCDLWFG  
LDHMLISGLEKRGTPY

>gi|15530243|gb|AAH13903.1| Ezrin [Homo sapiens]  
MPKPINVRVTMDAELEFAIQNTTGKQLFDQVVKTIGLREVWYFGLHYVDNKGFPPTWLKLDKKSVAQEV  
RKENLQFKFRAKFPYEDVAEELIQDITQKLFQVKEGILSDEIYCPPEAVLLGSYAVQAKFGDYNKE  
VHKSGLYSERLIPQRVMDQHKLRDQWEDRIQVWHAHEHRGMLKDNAMLEYLKIAQDLEMYGINYFEIKN

>gi|23270689|gb|AAH23506.1| Chromosome X open reading frame 56 [Homo sapiens]  
MPKVVSRSVVCSDTRDREYDDEGKPLHVYCYLQCGQMLVLDQLEKLPMPRPRDRSRVIDAAKHAKFCN  
TEDEETMYLRRPEGIERQYRKKCAKCGLPLFYQSQPKNAPVTFIVDGAVVKFGQGFQGTNIYTKQEPK  
KVMMTKRTKDMGKFSVTVSTIDEEEEIEAREVADSYAQNAAKVIKQLERKGMKRRRLQELAELEAKKA

>gi|15080135|gb|AAH11842.1| Chromosome 4 open reading frame 43 [Homo sapiens]  
MPKAPKGSAGREKKVIHPYSRKAQAITREAHKQEKKEKLNKALRLNLVGEKQLQWFQNHLDPPKKRYS  
KKDACELIBERYLNRFSSELEQIELHNSIRDRQRRHCSRETVIKQTMERERQQFEGYGLEIPDILNASNL  
KTFREWDFDLKLPNIKMRKICANDAI PKTCRKTITVTDQDLGELELNDESSSDSDEEMTAVA

>gi|12654877|gb|AAH01282.1| High mobility group nucleosomal binding domain 4 [Homo sapiens]  
MPKRRKAGDAKGDKAVKDEPQRRSARLSAKPAPPKPEPRPKASAKKGEKLPKGRKADAGKDGNNFA  
KNRDASTLQSQKAEGTGDAK

>gi|12804987|gb|AAH01947.1| CD2 (cytoplasmic tail) binding protein 2 [Homo sapiens]  
MPKRVTFQGVGDEDEDEIIVPKKKLVDPVAGSGGPGSRFKGKHSLSDEEEDDDGGSSKYDILASED  
VEGQEAATLPSGEGVRI TPFNLQEEEMEGHFADAGNYFLNRDAQIRDSWLDNIDWVKIRERPPGQRQASD  
SEEDSLGQTSMSAQAALLEGLLELLLPRETAVAGALRRLGARGGGKGRKGGPQSPSPQRLDRLSGLADQMV

**MAPK**

>gi|49456869|emb|CAG46755.1| MYL2 [Homo sapiens]  
MAPKKAKKRAGGANSNVFSMFEQTQIQEFKEAFTIMDQNRDGFIDKNDLRDTFAALGRVNVKNEEIDEMI  
KEAPGPINFVFLTMFGEKLGADPEETILNAFKVFDPEGKGVLKADYVREMLTTQAERFSKEEVDQMFA  
AFPPDVTGNLDYKNLVHIIITHGEEKD

>gi|48145647|emb|CAG33046.1| TOMM34 [Homo sapiens]  
MAPKFPDSVEELRAAGNESFRNGQYAEASALYGRALRVLQAQSSDPEEESVLYSNRAACHLKDGNCRDC  
IKDCTALALVPFSIKPLLRASAYEALEKYPAYVDYKTVLQIDDNVTSAVEGINRMTRALMDSLGPPEW  
RLKLPSPILPVPVSAQKRWNLSLPSENHKEMAKSKSKETTATKNRVPSAGDVEKARVLKEEGNELVKKGNHK  
>gi|48145855|emb|CAG33150.1| MYL1 [Homo sapiens]  
MAPKKDVKKPVAAAAAPAPAPAPAPAPAPAKPKEEKIDLSAIKIEFSKEQQDEFKEAFLFDRTGDSKI  
TLSQVGDVLRALGTNPTNAEVRKVLGNPSNEELNAKKIEFEQFLPMMQAI SNKDDQATYEDFVEGLRVFD  
KEGNGTVMGAELRHVLA TLGKMKEEVEALMAGQEDSNGCINYEAFVKHIMS I

>gi|48146043|emb|CAG33244.1| HUMMLC2B [Homo sapiens]  
MAPKRAKRRRTVEGGSSVFSMFDQTQIQEFKEAFTVIDQNRDGIIDKEDLRDTFAAMGRNLNVKNEELDAM  
MKEASGPINFVFLTMFGEKLGADPEDVITGAFKVLDPGKGTIKKKFLEELLTTQCDRFSQEEIKNMW  
AAFPPDVGGNVYKNICYVITHGDAKDQD

>gi|34678|emb|CAA36256.1| myosin light chain 1 [Homo sapiens]  
MAPKKPEPKKEAAKPMNVKMLDFETFLPILAPAPAPAPAPAPAQHISRNKEQGTYEDFPEAPKEPAFD  
PKSVKVEGLRVFVFKNSVTVIDFTADQIEEFKEAFMGAE LRHVLA TLGKESLFDRTPTGEMKITIYMT EAE  
VEQLLAGQEDGQCGDVLRALGQNPTANGCINYEAFVKHIMNAEVLRLVGLKPKPEESG

>gi|31442110|emb|CAA40761.1| myosin light chain 2 [Homo sapiens]  
MAPKKAKKRAGGANSNVFSMFEQTQIQEFKEAFTIMDQNRDGFIDKNDLRDTFAALRVNVKNEEIDEMIK  
EAPGPINFVFLTMFGEKLGADPEETILNAFKVFDPEGKGVLKADYVREMLTTQAERFSKEEVDQMFAA  
FPDVTGNLDYKNLVHIIITHGEEKD

>gi|28170654|emb|CAD62165.1| NADH-ubiquinone oxidoreductase subunit B14.7 [Homo sapiens]  
MAPKVFRQYWDIPDGTDCRKAYSTTISAVAGLTAAYRVTLNPPGTFLEGVAKVGQYFTTAAAVGAVF  
GLTTCISAHVREKPDPLNYFLGGCAGGLTLGARTHNYGIGAAACVYFGIAASLVKMRLEGWEVFAKPK  
V

>gi|30582177|gb|AAP35315.1| signal sequence receptor, gamma (translocon-associated protein gamma) [Homo sapiens]  
MAPKGSQKQSEEDLLQDFSRNLSAKSSALFFGNAFIVSAIPIWLYWRIWHMDLIQSAVLYSVMTLVST  
YLVAFAFKNVKVFV LKHKVAQKREDAVSKEVTRKLS EADNRKMSRKEKDERILWKKNEVADYEATTF SIFY  
NNTLFLVVIVASFFILKNFNPTVNYILSISASSGLIALLSTGSK

>gi|30583117|gb|AAP35803.1| damage-specific DNA binding protein 2, 48kDa [Homo sapiens]  
MAPKKRPETQKTSEIVLPRNKRSRSPLELEPEAKKLCAGSGPSRRCDSDCLWVGLAGPQILPPCRSIV  
RTLHQHKLGRASWPSVQQLQSSFLHTLDSYRILQKAAFFDRRATSLAWHPHPSTVAVGSKGGDIMLWN  
FGIKDKPTFIKIGAGGSITGLKFNPLTNQFYASSMEGTTRLQDFKGNILRVFASSDTINIWFCSLDVS

>gi|45479702|gb|AAS66753.1| sperm-associated antigen 17 [Homo sapiens]  
MAPKKEKGGTVNTSSKIWEPSLIAAQFNQNDWQASIAFVVGNIQIEDLLIQALTVAVQVPQRKLFMSVSW  
QDILQQINEINTLVGSASSKAKKPVGNAPLYEVLTAAKAIMDSGEKLTLP LIGKLLKFQLLQIKFKD  
QQRRENEKKVIEDKPKLEKDKGAKSPKEKKAPSAPKPAKGGKQPEANAPVKKTTLQKRRGEDDHTNRY

>gi|57546150|gb|AAW51946.1| chemokine-like factor super family 2 transcript variant 2 [Homo sapiens]  
MAPKAAKGAKEPAPAPPPGAKPEEDKDKGKPEPSDKPQKAVQDHKEPSDKPQKAVQPKHEVGTTRGCR  
YRWELKDSNKEFWLLGHAEIKIRSLDLFNDLIACAFLVGAVVFAVRSRRSMNLHYLLAVILIGAAGVFAF  
IDVCLQRNHFGRGKAKKHMVLPVPGKEKGPQQKGPPEAKPPEPGKPPGPAKGGK

>gi|22653407|gb|AAN04045.1| isoform TCP11d [Homo sapiens]  
MAPKGI LGSFPTAMNLSLEGKVKETVHNAFWHDLKEQLSATPPDFSCALELLKEIKEILLSLLPRQNRL  
RIEIEEALDMDLLKQEAHEGALKVLYLSKYV LNMALLCAPVRDEAVQKLENI TDPVWLLRGI FQVLGRM  
KMDMVNYTIQSLQPHLQEHSIQYERAKQELLNKQPSLLNHTTKWLTQAAGDLTMSPTCPDTS DSSSVA

>gi|15680215|gb|AAH14459.1| Ribosomal protein L23a [Homo sapiens]  
MAPKAKKEAPAPPKAEAKAKALKAKKAVLKGVHSHKKKIRTSPTFRPKTLRLRRQPKYPRKSAPRRNK  
LDHYAIIKFLPTTESAMKKIEDNNTLVFIVDVKANKHQIKQAVKKLYDIDVAKVNTLIRPDGEKKAYVRL  
APDYDALDVANKIGII

>gi|18605583|gb|AAH22845.1| Mortality factor 4 like 1 [Homo sapiens]  
MAPKQDPKPKFQEGERVLCFHGPLLYEAKCVKVAIKDKQVKYFIHYSGWNKNWDEWVPESRVLKYVDTNL  
QKQRELQKANQEYAEAGKMRGAAPGKKTSGLQKQKNEVKTCKNKQKTPGNGDGGSTSETPQPFRKKRARV  
DPTVENEETFMRNVEVKVIPEELKPLWVDDWDLITRQKQLFYLPAAKKNVDSILEDYANYKKSRRGNTDNK

>gi|6116899|dbj|BAA85771.1| peptidylarginine deiminase type I [Homo sapiens]  
MAPKRVVQLSLKMPHAKVAVCVVGEAHVDIHSVDPKGANFRVSGSSGVVEFMVYNRTRVKEPIGKARWPL  
DTPDADMVVSVTASKELKDFKVRVSYFGEQEDQALGRSVLYLTGVDSILEVDTGRTGKVKRSQGDKKTWR  
WGPEGYGAILLVNCDRDNHRSAPFDLTHSWLMSLADLQDMSPLLSCNGPDKLFDSSHKLVLNVFFSDSKR

>gi|3818467|gb|AAC69518.1| growth arrest-specific protein 8 [Homo sapiens]  
MAPKKKGGKKGAKGTPIVDGLAPEDMSKEQVEEHVSRIREELDREREERNYFQLERDKIHTFWEITRRQL  
EEKKAELRNKDREMEEAERHQVEIKVKYKQVKHLLYEHQNNLTEMKAEGTVVMKLAQKEHRIQESVLRK  
DMRALKVELKEQELASEVAVVKNLRLKHTTEITRMRNDFERQVREIEAKYDKMKMLRDELDRRKTTELHE

>gi|4808552|gb|AAD29855.1|AF083068\_1 NAD+ ADP-ribosyltransferase 3 [Homo sapiens]  
]  
MAPKPKPWVQTEGPEKKKGRQAGREEDPFRSTAEALKAIPAEKRIIRVDPTCPLSSNPQTQVYEDYNCTL  
NQTNIENNNKFFYIIQLLQDSNRFFTCWNRWGRVGEVQSKINHFTRLEDAKDFEKKFREKTKNNWAER  
DHFVSHPGKYTLLEVQAEDAQAQAVVVDRAVVRTVTKRVQPCSLDPATQKLIITNIFSKEMFKNTMALMD

>gi|9802370|gb|AAF99698.1| GABAA receptor gamma 3 subunit [Homo sapiens]  
MAPKLLLLLCLFSGHLHARSRKVEEYEDSSSNQKWLAPKSDTDVTLILNKLLEVDKLRPDIGIKP  
TVIDVDIYVNSIGPVSSINMEYQIDIFFAQWTDSRLRFNSTMKILTLNSNMVGLIWIPTDIIFRNSKTAE  
AHWITTPNQLLRINWDGKILYTLRLTINAECQLQLHNFPMDEHSCPLIFSSYGYPKKEMIYRWKNSVEA

>gi|15787612|gb|AAL06239.1| testis development protein NYD-SP29 [Homo sapiens]  
MAPKQKKKTSRGGKRLKPVLAASEDMEPVNMESMGHPPIYPLVLTTKTQEIFNCRIDEDVTDEQPYKLIN  
KEDIFEDLRNRAAVSDFHPVKKIQEYPGNELLLVYDEDFKYGLNFYLIATEEGKENYLNPPVPEEQEE  
YKEHIPEDVYIYKPPVSKPWSVLSGSEKIEEESVTESTKQITYMSRKRSEFGAPIKFSQDNASSVKDAY

>gi|68532502|gb|AAH96706.1| RPL23AP13 protein [Homo sapiens]  
MAPKVKKEAPGPKAEAKAKALKAKKVVLVKGVHGKHKKIRMSPTFQRPKTLRLWRPPRYPRKTTPRNK  
LDHYAIKIFPLTTEFAMKIKDNTLVFTVDVKANKHQIKQAVKKLCDIDGAKVNTLMER

>gi|55663124|emb|CAH71408.1| SET translocation (myeloid leukemia-associated) [Homo sapiens]  
MAPKRQSPPLPPQKKKPRPPPALGPEETSASAGLPKKEKEQQAIEHIDEVQNEIDRLNEQASEEILKVE  
QKYNKLRQFFQKRSELIKIPNFVVTFFVNHQVQSALLGEEDEEALHYLTRVEVTEFEDIKSGYRIDFY  
FDENPYFENKVLKSEFHNLNESGDPSSKSTEIKWKSGLDLTKRSSQTQNKASRRKQHEEPESFTWFTDHS

>gi|37182400|gb|AAQ89002.1| APKK229 [Homo sapiens]  
MAPKKKSLRSLLLPLSLTLLLPQADTRSFVDRGHDRFLLDGAPFRYVSGSLHYFRVPRVLWADRLLKM  
RWSGLNAIQFYVFNWYHEPQPGVYFNFGSRDLIAFLNEAALANLLVILRPGPYICAEMWEMGGLPSWLLRK  
PEIHLRTPDPLAADVSWFKVLLPKIYFWLYHNGGNIISIQVENEYGSYRACDFSYMRHLAFLFRALLG

### MGPK

>gi|5830357|emb|CAA73027.1| interferon-related IFRD2 (PC4-B) protein [Homo sapiens]  
MGPKKSWRSHFFPLPEVWLLLLLSQALSFSHPQTQAGVGLVWSVPLPSALRSQSCLGAPLRDASELTTV  
HLFPTRGWGARRALWVHSSASASSAASRRRLRAQASGISSFSLVDGGAPREDGGARGVWLPSSGQVSAQR  
TGRRLVLGLEPTTGS�TPRPPRPVPGMPRARKNLTKRGGQRGGGARSSAQADSGSSDDEAASEARSTA

>gi|29861|emb|CAA38879.1| centromere autoantigen B (CENP-B) [Homo sapiens]  
MGPKRRQLTFREKSRIIQEVEENPDLRKGIEIARRFNIPSTLSTILKNKRAILASERKYGVASTCRKTNK  
LSPYDKLEGLLIAWFQQIRAAAGLPVKGIILKEKALRIAEELGDDFTASNGWLDLFRFRRHGVVSCSGVAR  
ARARNAAPRTPAAPASPAAVPSSEGGSTTGWRAREEQPPSVAEGYASQDVFSATETSLSWYDFLPDQAAG

>gi|5456984|gb|AAD43733.1| protocadherin gamma C5 [Homo sapiens]  
MGPKTLPLQAGKQVLCMLSLCCGWVSGQLRYSVVEESEPGTLVGNVAQDLGLKMTDLSRRLQLGSEE  
NGRYFSLSLMSGALAVNQKIDRESLCGASTSCLLPVQVVTEHPLELIRVEVEILDNDNSPSFATPEREM  
RISESAASGARFPLDSAQDPDVGNTVSVFYTLSPNSHFSLNKTLKDGKPFPELVLEQQLDREAQARHQL

>gi|13676362|gb|AAH06515.1| C6orf168 protein [Homo sapiens]  
MGPKLSTLDATVFGHLAQMWTLPGTRPERLIKELINLAMYCERIRKRFWPEWHDDNTIYEESESE  
GSKTHTPLLDLDFSYRTEFTEDEGAENSFSRTPDPTDFGHSLFSDSDVMDDDYTDHEQCK

>gi|37182788|gb|AAQ89194.1| livin inhibitor-of-apoptosis [Homo sapiens]  
MGPKDSAKCLHRGFPQSHWAAGDGTQERCGRSLGSPVLGLDTCRAWDHVDGQILGQLRPLTEEEEEEG  
AGATLSRGPAPFGMGSEELRLASFYDWPLTAEVPELLAAAGFFHTGHQDKVRCFFCYGGLQSWKRGDDP  
WTEHAKWFPSCQFLLRSKGRDFVHSVQETHSQQLLGSWDFWEEPEDAAPVAPSVFASGYPELTPPREVQS

**MPPK**

>gi|2584787|emb|CAA65068.1| Aminopeptidase P-like X-prolyl aminopeptidase (aminopeptidase P) [Homo sapiens]

MPPKVTSELLRQLRQAMRNSEYVTEPIQAYIIPSGDAHQSEYIAPCDRRAFVSGFDGSAGTAITEEHA  
AMWTDGRYFLQAAKQMDSNWTLMKMGLKDTPTQEDWLVSVLPEGSRVGVDPDIIPDYWKKMAKVLRSG  
HHLIPVKENLVDKIWTDRPERPCKPLLTGLDYGISWKKVADLRRLKMAERNVMWFVVTALDEIAWLFN

>gi|48146139|emb|CAG33292.1| VAMP4 [Homo sapiens]

MPPKFKRHLNDDVDVTSVKSERNLLEDDSDDEEDFFLRGSPGPRFGPRNDKIKHVQNVQVEIDVMQEN  
ITKVIERGERLDELQDKSESLDNATAFNSRSKQLRRQMWWRGCKIKAIMALVAAILLVVIILIVMKYR

>gi|24940374|emb|CAD54446.2| vaccinia-related kinase 2 [Homo sapiens]

MPPKRNEKYKLPFPFPEGKVLDDMEGNQWVLGKKIGSGGFGLIYLAFTNKPEKDARHVVKVEYQENGPL  
FSELKFYQRVAKKDCIKKWIERNQLDYLGIPLFYGSGLTEFKGRSYRFMVMERLIGIDLQKISGQNGTFFKK  
STVLQLGIRMLDVLEYIHENEYVHGDKAANLLLYGKNPDQVYLADYGLSYRYCPNGNHKQYQENPRKGH

>gi|55661102|emb|CAH70901.1| retinoblastoma 1 (including osteosarcoma) [Homo sapiens]

MPPKTPRKTAAATAAAAAEPPAPPPPPPEEDPEQDSGPEDLPLVRLEFEETEPEPDTALCQKLPDHFV  
RERAWLTWEKVSSVDGLGGYIQKKKELWIGICIFIAAVDLDEMSFTTELQKNIEISVHKFFNLLKEIDT  
STKVDNAMSRLKKYDVLFAFSLKERTCELIYLTQPSSSISTEINSALVLLKVSWITFLAKGEVLQMED

>gi|56204731|emb|CAI22352.1| thioredoxin interacting protein [Homo sapiens]

MPPKHSLSHRCLISVTASLMATRFSPFSGENEMVIMRPGNKYKFKGFELPQGGLGTSFKGKYGCVDYVW  
KAFLLDRPSQPTQETKKNFEVVDLVDPDLMAFVSAKKEKVVSCMFI PDGRVSVSARIDRKGFCGEDEI  
SIHADFENTCSRIVVPKAAIVARHTYLANGQTKVLTQKLSVVRGNHIIISGTCASWRGKSLRVQKIRPSIL

>gi|33337755|gb|AAQ13514.1| zinc finger CCCH-type containing 15 [Homo sapiens]

MPPKKQAQAGGSKKAEQKKKEKIIEDKTFGLNKKGAKQKFKI KAVTHQVFKGQONPRQVAQSEAEKLLK  
KDDKKKELQELNELFKPVVAAQKISKGADPKSVVCAFFKQGGCTKGDKCKFSDTLERKCEKRSVYIDA  
RDEELEKDTMDNWEKLEEVNKKHGEAEKKPKTKQIVCKHFLEAIENNKYGFVWVCPGGGIDICMYRHA

>gi|13436422|gb|AAH04986.1| Ribosomal protein S25 [Homo sapiens]

MPPKDDKKKKDAGKSAKKDKDPVNSGGKAKKKKWSKGVKRDKLNVLVDFDKATYDKLCKEVPNYKLITP  
AVVSERLKIRGSLARAALQELLSKGLIKLVSKHRAQVIYTRNTKGGDAPAAGEDA

>gi|29791753|gb|AAH50644.1| Ribosomal protein L12 [Homo sapiens]

MPPKFDNEIKVYVLRCTGGEVGATSALAPKIGPLGLSPKKVGDIIAKATGDWKGRLITVKLTIQNRQAQ  
IEVVPASALIIKALKEPPDRRKKQKNIKHSGNITFDEIVNIARQMRHRSLARELSGTIKEILGTAQSVG  
CNVDGRPHDIIIDDINSGAVECPAS

>gi|5420453|dbj|BAA82320.1| parvulin [Homo sapiens]

MPPKKGSGSGKAGKGAASGSDSADKKAQGPKGGGNAVKVRHILCEKHGKIMEAMEKLSGMRFNVEAAQ  
YSEDKARQGGDLGWMTRGSMVGPFEAAAFALPVS GMDKPVFTDPPVTKFGYHIIMVGRK

>gi|117558527|gb|AAI27120.1| XIRP1 protein [Homo sapiens]

MPPKKKQPLPPKPAHLTQSHPPQLPKPLPLSPFSSEVQREHQRGERTAIQPAPVPTTVDQGHIP  
ARCPSGHSQPSLQHLSTAPRPTKNQATGSNAQSSEPPKLNALNHDP TSPQWGPSPGSEQPMEGSHQGA  
PESPSDSLQRNQELQGLLNQVQALEKEAASSVDVQALRRLFEAVPQLGGAAPQAPAAHQKPEASVEQAFG

>gi|20810193|gb|AAH29376.1| Obg-like ATPase 1 [Homo sapiens]

MPPKGGDGIKPPPIIGRFGTSLKIGIVGLPNVGKSTFFNVL TNSQASAENFPFCTIDPNESRVPVDER  
FDFLCQYHKPASKIPAFNLVVDIAGLVKGAHNGQGLGNAFLSHISACDGI FHLTRAFEDDDITHVEGSVD  
PIRDIEIIEELQLKDEEMIGPIIDKLEKVAVRGGDKLKP EYDIMCKVKSVIDQKKPVRFYHDWNDKE

>gi|15214600|gb|AAH12425.1| Myosin, light chain 6B, alkali, smooth muscle and no n-muscle [Homo sapiens]

MPPKDKVPVKKPAGPSISKPAAPAAAGAPPAKTKAEPVAPQAPQKTQEPVVDLSKVVIEFNKDQLEEFK  
EAFELFDRVGDGKILYSQCGDVMRALGQNP TNAEVLKVLGNPKSDELKSRVDFETFLPMLQAVAKNRGQ  
GTYEDYLEGFRVDFKEGNKVMGAELRHVLTTLG EKMT EEEVETVLAGHEDSNGCINYEAF LKHILSV

**MSPK**

>gi|963060|emb|CAA46340.1| zinc-finger protein (ZNFp17) [Homo sapiens]

MSPKRDGLGTGDLGHSQVLQEQVSTGDNLHECDSQGP SKDTLVREGKTYKCKECSVFNKNSLLVRHQQI  
HTGVKPYECQECGKAFPEKVDFVRHMRHTG EKPCCKVCEGKVFNRSHLLCYRQIHTG EKPYECSECGK  
TFSYHSVFIQHRVTHTEKLF GCKE CGKTFY YNSL TRHMKIHTG EKPCCKSECGKTFYRSVFFRHSMT

>gi|5912556|emb|CAB56197.1| VCX-A protein [Homo sapiens]  
MSPKPRASGPPAKATEAGKRKSSSQPSPSDPKPKTKTKVAKKGAARRRRGKGAATKMAAVTAPAEESG  
PAAFGPSDQPSQELPPEEPVSEGTQHDPLSQESELEEPLSQESEVEEPLSQESEVVEEPLSQESEV  
EEPLSQESEVEEPLSQESEVEEPLSQESEVEEPLSQESEMEELPSV

>gi|303620|dbj|BAA00469.1| RCC1 [Homo sapiens]  
MSPKRIAKRRSPPADAIPKSKKVKVSHRSHSTEFGLVLTGLQGQDVQGLGLGENVMERKPPALVSIPEDVV  
QAEAGMHTVCLSKSGQVYSGFCNDEGALGRDTSVEGSEMVPQKVELQEKVVQVSAGDSHTAALTDDGRV  
FLWGSFRDNNNGVIGLLEPMKKSMVVPVQQLDVPVVKVASGNDDLMLTADGDLYTLGCGEQQLGRVPEL

>gi|15128484|dbj|BAB62714.1| phosphodiesterase 11A1 [Homo sapiens]  
MSPKCSADAENSFKESMEKSSYSDWLINNSIAELVASTGLVNPISDAYQDPRFDEADQISGFHIRSVLC  
VPIWNSNHQIGVAQVLNRLDQGFDDADQRLFEAFVIFCGLGINNTIMYDQVKKSWAKQSVALDVLVSYH  
ATCSKAEVDFKKAANIPLVSELAIDDIHFDDFSLDAMDITAAALRMFMELGMVQKFKIDYETLCRWLLTV

>gi|19223979|gb|AAL86399.1|AF417578\_1 transmembrane channel-like protein 1 [Homo sapiens]  
MSPKVKVQIKVEEKEDETEESSSEEEEEVEDKLPRESLRPKRKRTRDVINEDDPEPEPEDEETRKAREKE  
RRRLKRGAEEKEIDEELERLKAELDEKROI IATVCKPKWMEKKIEVLKEAKKFSVENEGALGKGGK  
RWFAFKMMMAKKWAKFLRDFENFKAACVPWENKIKAIESQFGSSVASYFLFLRWMYGVMVLFILFSLI

### MGSK

>gi|49168604|emb|CAG38797.1| RAD51L1 [Homo sapiens]  
MGSKKLKRVLGSLQELCDRLSRHQILTQDFLCLSPLELMKVTGLSYRGVHELLCMVSRACAPKMOTAYGI  
KAQRSADFPALFSTTSLDEALHGGVACGSLTEITGPPGCGKTQFCIMMSILATLPTNMGLEGAVVY  
IDTESAFSAERLVEIAESRFPRFYNTTEKLLTSSKVHLYRELTCDLVLRQIESLEEEIISKGIKLVLD

>gi|47678501|emb|CAG30371.1| chromosome 22 open reading frame 42 [Homo sapiens]  
MGSKLTCLGPGSGLNDCRPDVGPCHECEIPETVAATAPASTTAKPAKLDLKAKKAQLMQVLSLQKTP  
KMLKMSKGLDARSKRWLKIWRRHGIWPLENIGPTEDVQASAHGGVENMTSDIEIPEAKHHRPTEDVQ  
VSAHGGVEENITSDIEISEAKHHDHVEDLSESLSVLCLEDFMSTDLSESLSVSLEDFMSTGLSESLSVL

>gi|6690091|emb|CAB65555.1| enteropeptidase [Homo sapiens]  
MGSKRGISRHHSLSSYEIMFAALFAILVVLCAGLIAVSLTIKESQRGAALQGSHEARATFKITSGVTY  
NPNLQDKLSVDFKVLAFDQOMIDEIFLSSNLKNEYKNSRVLQFENGSIIVVFDLFFAQWVSDQNVKEEL  
IQGLEANKSSQLVTFHIDLNSVDILDKLTTTSHLATPGNVSIECLPGSSPCTDALTCIKADLFCDEGEVNC

>gi|17391044|gb|AAH18441.1| C19orf25 protein [Homo sapiens]  
MGSKAKKRVLTRPAPTVEQILEDVGRPAEDPVFTILAPEDPPVFRMMEDAEAPGEQLYQOQSRAYV  
AANQRLQQAGNVLRQRCHELLQRAGEDLEREVAQMKQAALPAEAASSG

>gi|30721853|gb|AAP34197.1| polybromo-1D [Homo sapiens]  
MGSKRRTATSPSSSVSGDFDDGHHSVSTPGPSRKRRRLSNLPTVDPIAVCHELYNTIRDYKDEQGRLLCE  
LFIAPKRRNQPDYEVVVSQPIDLMIQQLKMEYDVLNLLTADFQLFNNAKSYYKPDSPPEYKAACKL  
WDLYLRTRNEFVQKGEADDEDDEDGQDNQGTVEGSSPAYLKEILEQLEAIVVATNPSGRLLISELFQK

>gi|20380850|gb|AAH28071.1| Myosin IF [Homo sapiens]  
MGSKERFHWQSHNVKQSGVDMDVLLPQITEDATAANLKRFRMDYIFTYIGSVLISVNPFFKQMPYFTDRE  
IDLQGAQYENPPHIYALTDNMYRNMLIDCENQCVIISGESGAGKTVAAKYMYSKVSQGGGEKVVQHV  
KDIILQSNPLLEAFNGAKTVRNNSSRFGKYFETQFSRGGEPDGGKISNLFLEKSRVVMQNENERNFHIY

>gi|16877372|gb|AAH16936.1| Odd-skipped related 2 (Drosophila) [Homo sapiens]  
MGSKALPAPIPLHPSLQLTNYSFLQAVNTFFPATVDHLQGLYGLSAVQTMHMNHWTLYGPNVHEITRSTIT  
EMAAQGLVDARFFPALFPTTLFHPKQGAIAHVLPALHKDRFRDFANLAVAATQEDPPKMGDLKLS  
PGLGSPISGLSKLTPDRKPSRGLPSKTKEFICKFCGRHFTKSYNLLIHERHTDERPYTCDICHKAFR

>gi|21411351|gb|AAH31046.1| Meiosis-specific nuclear structural 1 [Homo sapiens]  
MGSKRRLSCSERHQKLVDENYCKLHVQALKNVNSQIRNQMVQENENDNRVQRKQFLRLLQNEQFELDME  
EAIQKAEENKRLKELQKQEELKAMELAKLKHESLKDDEKMRQQVRENSIELRELEKLLKAAVMNKERAQAQ  
IAEKDAIKYEQMKRDAEIAKTMMEHKKRIIKEENAEDKRNKAKAQYLDLEKQLEEQEKKKQBEAYEQLL

>gi|20799125|dbj|BAB92079.1| zinc finger transcription factor [Homo sapiens]  
MGSKTLPAFVPIHPSLQLTNYSFLQAVNGLPTVPSDHLNLYGFSALHAVHHLHQWTLYGYPAMHLPRSSFS  
KVPGTVSSLVDAARFQLPAFWFPHVQPKPEITAGGSVPALKTKPRDFANLALAAATQEDPAKLGRGEGP  
GSPAGGLGALLDVTKLSPEKKPTRGRLPKTKKEFVCKFCGRHFTKSYNLLIHERHTDERPYTCDICHK

>gi|14326451|gb|AAK60271.1|AF384555\_1 farnesol receptor [Homo sapiens]  
MGSKMNLIHSHLPTTDEFSSFSENLFVLTQVAGPLGQNLEVEPYSQYSNVQFPQVQFQISSSSYSNL  
GFYPQQPEEWYSPIYELRRMPAETLYQGETEVAEMPVTKKPRMGASAGRIKGEDELGVVCGRASGYHYN  
ALTCEGCKGFFRRSITKNAVYKCKNNGNCVMDMYMRKQCQECRLKCKEMGMLAECMYTGLLTEIQCKSK

>gi|124376338|gb|AAI32759.1| H6 family homeobox 2 [Homo sapiens]  
MGSKEDAGKGC PAAGVSSFTTIQSILGGGPSEAPREPVGWPARKRSLSVSSEEEPPDDGWKAPACFCPDQ  
HGPKKEQGPKHHPIPFPCLTGPKSGSGGPGGLERTPFLSPSHSDFKEEKERLLPAGSPSPGSEPRDGG  
AERQAGA AKKTRTVFSRSQVYQLESTFDMKRYLSSSERACLASSLQLTETQVKTWFQNRNRKWKRLSA

>gi|3435090|gb|AAC32544.1| RTN2-C [Homo sapiens]  
MGSKVADLLYWKDTRTSGVFTGLMVSLCLLHFSIVSVAHLALLLLCGTISLRVYRKVLQAVHRGDGA  
NPFQAYLDVLDLTLTREQTERLSHQITSRVVSAAATQLRHFFLVEDLVDSLKLALLFYILTFVGAIFNGLTL  
LILGVIGLFTIPLLYRQHQAIQDYVGLVTNQLSHIKAKIRAKIPGTGALASAAA VSGSKAKAE

>gi|2745974|gb|AAC23441.1| bridging integrator protein-1 [Homo sapiens]  
MGSKGVTAGKIASNVQKKLTRAQEKVLQKLGKADETKDEQFEQCVQNFNKQLTEGTRLQKDLRTYLASVK  
AMHEASKKLNELQEVYEPDWGRDEANKIAENNDLLWMDYHQKLVQALLTMDTYLGQFPDIKSRIAKR  
GRKLVVDYSARHHYESLQTAKKKDEAKIAKAEELIKAKQKVFEE MNVDLQEELPSLWNSRVG FVNTFQS

>gi|68533509|gb|AAH98392.1| Myosin IE [Homo sapiens]  
MGSKGVYQYHWQSHNVKHSVDDMVLSSKITENSIVENLKKRYMDDYIFTYIGSVLISVNPFFKQMPYFGE  
KEIEMYQGAAQYENPPIYALADNMYRNMIIDRENQCVIISGESGAGKTVAAKYIMSYISRVSGGGTKVQ  
HVKDIILQSNPLLEAFNGAKTVRNNSRFRGKYFEIQFSPGGEPDGGKISNFLEKSRVVMRNP GERSFH

>gi|146261997|ref|NP\_001078948.1| IQ domain-containing protein F3 [Homo sapiens]  
MGSKCCKGGPDEDAVERQRRQKLLLAQLHHRKRVKAAGQIQAWWRGVLVRRRTLLVAALRAWMIQCWWRTL  
VQRRIRQRRQALLRVYVIEQEQATVKLQSCIRMWQCRQCYRQMCNACLQFQVPESSLAFQTDGFLQVQYAI  
PSKQPEFHIEILSI

>gi|7106822|gb|AAF36136.1| zinc finger, C3HC-type containing 1 [Homo sapiens]  
MGSKPFELSPVCAKYGWVTVCEMLKCSSCQAFCLCASLQPAFDFDRYKQRCALKKALCTAHEKFCFWP  
DSPSPDRFGMLPLDEPAIIVSEFLDRFSKPLSLGPPASFPKAGGLENYVLDRRQDQSSPTLLEDELDRHT  
DERKTTIKLGSIDQVHVTVACILSVCGWACSSSLESMLSLIACSQCMRRVGLWGFQQIESSMTDLASFG

>gi|57999423|emb|CAI45925.1| probable ATP-dependent RNA helicase DDX60-like [Homo sapiens]  
MGSKDHAVFFREMTQLILNEMPKAGYSSILNDFVESNFFVIDGDSLLVTCLGVKSFKWQNLHFFLYVEC  
YLVDLLSNGGQFTIVFFKDAEYAYFDFPELLSLRTALILHLQHNTNIDVQTEFSGCLSQDWKLLLEQHYP  
YFLIVSEGLSDLQTYLNFLLIHSWGMKVNVLSSGHESDTRLRFYAYTMESTDRNQTF SKENETVIQSA

>gi|17511697|gb|AAH18706.1| TNS4 protein [Homo sapiens]  
MGSKASSPHGLGSPVSPRLEKRLGGLAPQRGSRISVLSASPVSDVSYMFGSSQSLHSSNSSHQSSSR  
SLESPANSSSSLSLGSVSLCTRPSDFQAPRNPTLTMGQPRTPHSPPLAKEHASSCPPSITNSMVDIPIV  
LINGCPEPGSSPPQRTPHQNSVQPGAASPSNPCPATRSNSQTLSDAPFTTCPEGPARDMQPTMKFVMDT

>gi|55958192|emb|CAI12845.1| REX4, RNA exonuclease 4 homolog (S. cerevisiae) [Homo sapiens]  
MGSKKKPKIIQQNKKETSPOVKGEEMPAGKDQEASRGVSPSGSKMDRRAPVPRTKASGTEHNKKGTKERT  
NGDIVPERGDIHKKRKAKEAAPAPTEEDIWFDVDPADIEAATGPEAAKIARKQLGQSEGSVSLSLVK  
EQAFGGLTRALALDCEMVGVPKGEESMAARVSVNQQYKCVYDKYVKP
